# Supplementary material for: Investigating the Impact of Spatial Distribution of Sustainable Drainage System (SuDS) Components on Their Flood Mitigation Performance in Communities with High Groundwater Levels
Source: MDPI journal article supplement (doi:10.3390/w14091367), 2022-04-22
Supplement: s1 [file s1]

## ***Supplementary Material***

# **Investigating the Impact of Spatial Distribution of Sustainable Drainage System (SuDS) Components on Their Flood Mitigation Performance in Communities with High Groundwater Levels**

Yao Ma <sup>1,2</sup>, \*Xilin Xia <sup>2</sup>, Qiuhua Liang <sup>2</sup>, \*Hongyou Wan <sup>1,3</sup>

<sup>1</sup> School of Ecology and Environment, Zhengzhou University, 100 Kexue Avenue, Zhengzhou, Henan, 450001, P. R. China

<sup>2</sup> School of Architecture, Building and Civil Engineering, Loughborough University, Epinal Way, Loughborough, LE11 3TU, UK

<sup>3</sup> Research Centre of Engineering and Technology for Synergetic Control of Environmental Pollution and Carbon Emissions of Henan Province, Zhengzhou 450001, China

\*Correspondence: X.X., X.Xia2@lboro.ac.uk; H.W., hywan@zzu.edu.cn

Number of pages: 98, Number of tables: 8, Number of figures: 84

## **Supplementary captions:**

**S1.** Definition of the subcatchments in SWMM

**S2.** Process of DSM and DTM data

**Table S1.** Parameter settings of subcatchment components in the SWMM model

**Table S2.** Infiltration parameter settings in the SWMM model

**Table S3.** Parameter settings of junctions and conduits in the SWMM model

**Table S4.** Parameter settings of the SuDS components in the SWMM model

**Table S5.** Summary of soil characteristics in the SWMM user's manual

**Table S6.** Summary of Manning's n in the SWMM user's manual

**Table S7.** Summary of types and number of SuDS components applied in the 27 scenarios

**Table S8.** Summary of the spatial characteristics in the considered scenarios

**Figure S1.** Schematic diagram of the rain garden and green roof

**Figure S2.** The sketch map of Scenario 1

**Figure S3.** The sketch map of Scenario 2

**Figure S4.** The sketch map of Scenario 3

**Figure S5.** The sketch map of Scenario 4

**Figure S6.** The sketch map of Scenario 5

**Figure S7.** The sketch map of Scenario 6

**Figure S8.** The sketch map of Scenario 7

**Figure S9.** The sketch map of Scenario 8

**Figure S10.** The sketch map of Scenario 9

**Figure S11.** The sketch map of Scenario 10

**Figure S12.** The sketch map of Scenario 11

**Figure S13.** The sketch map of Scenario 12

**Figure S14.** The sketch map of Scenario 13

**Figure S15.** The sketch map of Scenario 14

**Figure S16.** The sketch map of Scenario 15

**Figure S17.** The sketch map of Scenario 16

**Figure S18.** The sketch map of Scenario 17

**Figure S19.** The sketch map of Scenario 18

**Figure S20.** The sketch map of Scenario 19

**Figure S21.** The sketch map of Scenario 20

**Figure S22.** The sketch map of Scenario 21

**Figure S23.** The sketch map of Scenario 22

**Figure S24.** The sketch map of Scenario 23

**Figure S25.** The sketch map of Scenario 24

**Figure S26.** The sketch map of Scenario 25

**Figure S27.** The sketch map of Scenario 26

**Figure S28.** The sketch map of Scenario 27

**Figure S29.** Flood map of scenario 0 at the time of 2h (1-hour rainfall event)

**Figure S30.** Flood map of scenario 1 at the time of 2h (1-hour rainfall event)

**Figure S31.** Flood map of scenario 2 at the time of 2h (1-hour rainfall event)

**Figure S32.** Flood map of scenario 3 at the time of 2h (1-hour rainfall event)

**Figure S33.** Flood map of scenario 4 at the time of 2h (1-hour rainfall event)

**Figure S34.** Flood map of scenario 5 at the time of 2h (1-hour rainfall event)

**Figure S35.** Flood map of scenario 6 at the time of 2h (1-hour rainfall event)

**Figure S36.** Flood map of scenario 7 at the time of 2h (1-hour rainfall event)

**Figure S37.** Flood map of scenario 8 at the time of 2h (1-hour rainfall event)

**Figure S38.** Flood map of scenario 9 at the time of 2h (1-hour rainfall event)

**Figure S39.** Flood map of scenario 10 at the time of 2h (1-hour rainfall event)

**Figure S40.** Flood map of scenario 11 at the time of 2h (1-hour rainfall event)

**Figure S41.** Flood map of scenario 12 at the time of 2h (1-hour rainfall event)

**Figure S42.** Flood map of scenario 13 at the time of 2h (1-hour rainfall event)

**Figure S43.** Flood map of scenario 14 at the time of 2h (1-hour rainfall event)

**Figure S44.** Flood map of scenario 15 at the time of 2h (1-hour rainfall event)

**Figure S45.** Flood map of scenario 16 at the time of 2h (1-hour rainfall event)

**Figure S46.** Flood map of scenario 17 at the time of 2h (1-hour rainfall event)

**Figure S47.** Flood map of scenario 18 at the time of 2h (1-hour rainfall event)

**Figure S48.** Flood map of scenario 19 at the time of 2h (1-hour rainfall event)

**Figure S49.** Flood map of scenario 20 at the time of 2h (1-hour rainfall event)

**Figure S50.** Flood map of scenario 21 at the time of 2h (1-hour rainfall event)

**Figure S51.** Flood map of scenario 22 at the time of 2h (1-hour rainfall event)

**Figure S52.** Flood map of scenario 23 at the time of 2h (1-hour rainfall event)

**Figure S53.** Flood map of scenario 24 at the time of 2h (1-hour rainfall event)

**Figure S54.** Flood map of scenario 25 at the time of 2h (1-hour rainfall event)

**Figure S55.** Flood map of scenario 26 at the time of 2h (1-hour rainfall event)

**Figure S56.** Flood map of scenario 27 at the time of 2h (1-hour rainfall event)

**Figure S57.** Flood map of scenario 0 at the time of 4h (3-hour rainfall event)

**Figure S58.** Flood map of scenario 1 at the time of 4h (3-hour rainfall event)

**Figure S59.** Flood map of scenario 2 at the time of 4h (3-hour rainfall event)

**Figure S60.** Flood map of scenario 3 at the time of 4h (3-hour rainfall event)

**Figure S61.** Flood map of scenario 4 at the time of 4h (3-hour rainfall event)

**Figure S62.** Flood map of scenario 5 at the time of 4h (3-hour rainfall event)

**Figure S63.** Flood map of scenario 6 at the time of 4h (3-hour rainfall event)

**Figure S64.** Flood map of scenario 7 at the time of 4h (3-hour rainfall event)

**Figure S65.** Flood map of scenario 8 at the time of 4h (3-hour rainfall event)

**Figure S66.** Flood map of scenario 9 at the time of 4h (3-hour rainfall event)

**Figure S67.** Flood map of scenario 10 at the time of 4h (3-hour rainfall event)

**Figure S68.** Flood map of scenario 11 at the time of 4h (3-hour rainfall event)

**Figure S69.** Flood map of scenario 12 at the time of 4h (3-hour rainfall event)

**Figure S70.** Flood map of scenario 13 at the time of 4h (3-hour rainfall event)

**Figure S71.** Flood map of scenario 14 at the time of 4h (3-hour rainfall event)

**Figure S72.** Flood map of scenario 15 at the time of 4h (3-hour rainfall event)

**Figure S73.** Flood map of scenario 16 at the time of 4h (3-hour rainfall event)

**Figure S74.** Flood map of scenario 17 at the time of 4h (3-hour rainfall event)

**Figure S75.** Flood map of scenario 18 at the time of 4h (3-hour rainfall event)

**Figure S76.** Flood map of scenario 19 at the time of 4h (3-hour rainfall event)

**Figure S77.** Flood map of scenario 20 at the time of 4h (3-hour rainfall event)

**Figure S78.** Flood map of scenario 21 at the time of 4h (3-hour rainfall event)

**Figure S79.** Flood map of scenario 22 at the time of 4h (3-hour rainfall event)

**Figure S80.** Flood map of scenario 23 at the time of 4h (3-hour rainfall event)

**Figure S81.** Flood map of scenario 24 at the time of 4h (3-hour rainfall event)

**Figure S82.** Flood map of scenario 25 at the time of 4h (3-hour rainfall event)

**Figure S83.** Flood map of scenario 26 at the time of 4h (3-hour rainfall event)

**Figure S84.** Flood map of scenario 27 at the time of 4h (3-hour rainfall event)

## **Supplementary materials and methods**

### **S1. Definition of the subcatchments in SWMM**

The subcatchment component in SWMM is not completely suitable for this study, so some adjustments need to be made. In SWMM, subcatchments are divided into pervious and impervious subareas. Surface runoff can infiltrate into the upper soil zone of the pervious subarea, but not through the impervious subarea. However, SWMM can only consider the percentage of pervious/impervious subarea in a subcatchment rather than their spatial distribution. Besides, only the average infiltration parameters, slope and Manning roughness coefficient averaged by the area weighting in a subcatchment could be considered, which is not sufficient. To analyze the impact of the spatial distribution of SuDS components, the smaller subcatchments for analysis should be defined with a more specific approach, which is by the land use map. And these more specifically defined subcatchments will be referred to as “mini-catchments” in this paper.

### **S2. Process of DSM and DTM data**

There are trees in some of the green land mini-catchments, where the average slope calculated by processing DSM data cannot be used to simulate the surface condition well. Because in the DSM data, the tree crown in a green land may cover the real condition of the ground. Therefore, the slope data of the green land mini-catchments is calculated by processing the DTM data, while the DSM data is used to calculate the average slope of the other three kinds of mini-catchment.

**Table S1.** Parameter settings of subcatchment components in the SWMM model

| Parameter                                                     | Explanation                                               | Value       | Unit |
|---------------------------------------------------------------|-----------------------------------------------------------|-------------|------|
| <i>Depending on GIS data</i>                                  |                                                           |             |      |
| Area                                                          | Area of subcatchment                                      | 0.002~0.39  | ha   |
| Width                                                         | Width of overland flow path (Width =Area/Flow length)     | 2.69~60.55  | m    |
| %Slope                                                        | Average surface slope                                     | 0.95~446.66 | %    |
| <i>The same setting for the mini-catchments of buildings</i>  |                                                           |             |      |
| %Imperv                                                       | Percent of impervious area                                | 100         | %    |
| N-Imperv                                                      | Manning's n value of impervious areas                     | 0.012       | none |
| N-Perv                                                        | Manning's n value of pervious areas                       | 0           | none |
| Dstore-Imperv                                                 | Depression storage of impervious areas                    | 2.54        | mm   |
| Dstore-Perv                                                   | Depression storage of pervious areas                      | 0           | mm   |
| %Zero-Imperv                                                  | Proportion of impervious areas with no depression storage | 0           | %    |
| <i>The same setting for the mini-catchments of green land</i> |                                                           |             |      |
| %Imperv                                                       | See above                                                 | 0           | %    |
| N-Imperv                                                      | See above                                                 | 0           | none |
| N-Perv                                                        | See above                                                 | 0.389       | none |
| Dstore-Imperv                                                 | See above                                                 | 0           | mm   |
| Dstore-Perv                                                   | See above                                                 | 5.08        | mm   |
| %Zero-Imperv                                                  | See above                                                 | 0           | %    |
| <i>The same setting for the mini-catchments of open space</i> |                                                           |             |      |
| %Imperv                                                       | See above                                                 | 100         | %    |
| N-Imperv                                                      | See above                                                 | 0.011       | none |
| N-Perv                                                        | See above                                                 | 0           | none |
| Dstore-Imperv                                                 | See above                                                 | 2.54        | mm   |
| Dstore-Perv                                                   | See above                                                 | 0           | mm   |
| %Zero-Imperv                                                  | See above                                                 | 0           | %    |
| <i>The same setting for the mini-catchments of roads</i>      |                                                           |             |      |
| %Imperv                                                       | See above                                                 | 100         | %    |
| N-Imperv                                                      | See above                                                 | 0.011       | none |
| N-Perv                                                        | See above                                                 | 0           | none |
| Dstore-Imperv                                                 | See above                                                 | 2.54        | mm   |
| Dstore-Perv                                                   | See above                                                 | 0           | mm   |
| %Zero-Imperv                                                  | See above                                                 | 0           | %    |

**Table S2.** Infiltration parameter settings in the SWMM model

| <b>Parameter</b>                                                      | <b>Explanation</b>                                | <b>Value</b> | <b>Unit</b> |
|-----------------------------------------------------------------------|---------------------------------------------------|--------------|-------------|
| <i>The infiltration setting for the mini-catchments of buildings</i>  |                                                   |              |             |
| Max. Infil. Rate                                                      | Maximum rate on the Horton infiltration curve     | 0            | mm/hr       |
| Min. Infil. Rate                                                      | Minimum rate on the Horton infiltration curve     | 0            | mm/hr       |
| Decay Const.                                                          | Decay constant for the Horton infiltration curve  | 1.00         | 1/hr        |
| Drying Time                                                           | Time for a fully saturated soil to completely dry | 7.00         | days        |
| <i>The infiltration setting for the mini-catchments of green land</i> |                                                   |              |             |
| Max. Infil. Rate                                                      | See above                                         | 15           | mm/hr       |
| Min. Infil. Rate                                                      | See above                                         | 3.302        | mm/hr       |
| Decay Const.                                                          | See above                                         | 1.00         | 1/hr        |
| Drying Time                                                           | See above                                         | 7.00         | days        |
| <i>The infiltration setting for the mini-catchments of open space</i> |                                                   |              |             |
| Max. Infil. Rate                                                      | See above                                         | 0.00835      | mm/hr       |
| Min. Infil. Rate                                                      | See above                                         | 0            | mm/hr       |
| Decay Const.                                                          | See above                                         | 1.00         | 1/hr        |
| Drying Time                                                           | See above                                         | 7.00         | days        |
| <i>The infiltration setting for the mini-catchments of roads</i>      |                                                   |              |             |
| Max. Infil. Rate                                                      | See above                                         | 0.00835      | mm/hr       |
| Min. Infil. Rate                                                      | See above                                         | 0            | mm/hr       |
| Decay Const.                                                          | See above                                         | 1.00         | 1/hr        |
| Drying Time                                                           | See above                                         | 7.00         | days        |

**Table S3.** Parameter settings of junctions and conduits in the SWMM model

| Parameter        | Explanation                                                                                         | Value        | Unit              |
|------------------|-----------------------------------------------------------------------------------------------------|--------------|-------------------|
| <i>Junctions</i> |                                                                                                     |              |                   |
| Invert El.       | Elevation of junction's invert                                                                      | -6.0~-9.0    | m                 |
| Max. Depth       | Maximum water depth                                                                                 | 5.0          | m                 |
| Initial Depth    | Initial water depth in junction                                                                     | 0            | m                 |
| Surcharge Depth  | Depth in excess of maximum depth before flooding occurs                                             | 0            | m                 |
| Ponded Area      | Area of ponded water when flooded                                                                   | 100.0        | m <sup>2</sup>    |
| <i>Conduits</i>  |                                                                                                     |              |                   |
| Shape            | Geometric properties of the conduit's cross section                                                 | circular     | none              |
| Roughness        | Manning's roughness coefficient                                                                     | 0.015        | none              |
| Max. Depth       | Diameter of circular conduit                                                                        | 2.0          | m                 |
| Inlet Offset     | Depth or elevation of the conduit invert above the node invert at the upstream end of the conduit   | 3.0          | m                 |
| Outlet Offset    | Depth or elevation of the conduit invert above the node invert at the downstream end of the conduit | 3.0          | m                 |
| Length           | Conduit length                                                                                      | 14.88~243.56 | m                 |
| Initial Flow     | Initial flow in the conduit                                                                         | 0            | m <sup>3</sup> /s |

The assumption parameters are set according to a previous study on the spatial distribution of pervious pavements and bioretention cells in a community-scale catchment of 20 hectares<sup>[35]</sup>. The diameter of circular conduits used in their study is 1.2 meters<sup>[35]</sup>. Therefore, considering that the study area in this study is bigger and there are fewer conduits set in the study area, the diameter of the conduits is set as 2 meters. And from the same consideration, the maximum water depth of junctions is set as 5 meters, referring to the depth of 3.8 meters set in the previous similar study<sup>[35]</sup>.

**Table S4.** Parameter settings of the SuDS components in the SWMM model

| Layers       | Coefficient                | Green roof | Rain garden | Unit            |
|--------------|----------------------------|------------|-------------|-----------------|
| Surface      | Berm height                | 0          | 150         | mm              |
|              | Vegetation volume fraction | 0.1        | 0.1         | volume fraction |
|              | Surface roughness          | 0.15       | 0.41        | none            |
|              | Surface slope              | 5          | 1           | %               |
| Soil         | Thickness                  | 120        | 450         | mm              |
|              | Porosity                   | 0.437      | 0.437       | volume fraction |
|              | Field capacity             | 0.105      | 0.105       | volume fraction |
|              | Wilting point              | 0.047      | 0.047       | volume fraction |
|              | Conductivity               | 25.4       | 25.4        | mm/hr           |
|              | Conductivity slope         | 55.4       | 55.4        | none            |
|              | Suction head               | 60.96      | 60.96       | mm              |
|              | Thickness                  | 25.4       | /           | mm              |
| Drainage mat | void fraction              | 0.5        | /           | none            |
|              | roughness/Manning's n      | 0.25       | /           | none            |

The berm height of green roofs is set as 0 meters to avoid ponding on the roof, while the berm height of rain gardens is set as 150mm according to the maximum water depth regulated in the SuDS manual <sup>[25]</sup>. The vegetation volume fraction of both green roofs and rain gardens is set as 0.1 refer to the recommended value for surface with dense vegetations in the SWMM user's manual <sup>[57]</sup>. According to the SuDS manual <sup>[25]</sup>, the vegetations in green roofs and rain gardens are chosen as short grass and Bermuda grass, respectively. Then the surface roughness of green roofs and rain gardens are set as 0.15 and 0.41 according to Manning's n summarized in Table S5. And the surface slope of green roofs and rain gardens are both set according to the SuDS manual too <sup>[25]</sup>. The thickness of soil layer is set according to the recommendation in the SWMM user's manual <sup>[57]</sup>. As the loamy soil is chosen as the soil used in the soil layer of both SuDS components to increase the infiltration, the rest of six soil layer parameters are set according to Table S6. The thickness, void fraction and roughness of drainage mat in green roofs are set according to the recommendation range of value provided in the SWMM user's manual <sup>[57]</sup>.

**Table S5.** Summary of soil characteristics in the SWMM user's manual <sup>[57]</sup>

| <b>Soil texture class</b> | <b>Porosity (fraction)</b> |
|---------------------------|----------------------------|
| Sand                      | 0.437                      |
| Loamy sand                | 0.437                      |
| Sandy loam                | 0.453                      |
| Loam                      | 0.463                      |
| Silt loam                 | 0.501                      |
| Sandy clay loam           | 0.398                      |
| Clay loam                 | 0.464                      |
| Silty clay loam           | 0.471                      |
| Sandy clay                | 0.430                      |
| Silty clay                | 0.479                      |
| Clay                      | 0.475                      |

**Table S6.** Summary of Manning's n in the SWMM user's manual <sup>[57]</sup>

| Surface                                | n     |
|----------------------------------------|-------|
| Smooth asphalt                         | 0.011 |
| Smooth concrete                        | 0.012 |
| Ordinary concrete lining               | 0.013 |
| Good wood                              | 0.014 |
| Brick with cement mortar               | 0.014 |
| Vitrified clay                         | 0.015 |
| Cast iron                              | 0.015 |
| Corrugated metal pipes                 | 0.024 |
| Cement rubble surface                  | 0.024 |
| Fallow soils (no residue)              | 0.050 |
| Cultivated soils (residue cover < 20%) | 0.060 |
| Cultivated soils (residue cover > 20%) | 0.170 |
| Range (natural)                        | 0.130 |
| Grass (short, prairie)                 | 0.150 |
| Grass (dense)                          | 0.240 |
| Grass (Bermuda grass)                  | 0.410 |
| Woods (light underbrush)               | 0.400 |
| Woods (dense underbrush)               | 0.800 |

**Table S7.** Summary of types and number of SuDS components applied in the 27 scenarios

| Scenarios | Green roof units | Rain garden units | Total SuDS units |
|-----------|------------------|-------------------|------------------|
| 1         | 622              | 527               | 1149             |
| 2         | 622              | 527               | 1149             |
| 3         | 622              | 527               | 1149             |
| 4         | 622              | 527               | 1149             |
| 5         | 622              | 527               | 1149             |
| 6         | 622              | 527               | 1149             |
| 7         | 622              | 527               | 1149             |
| 8         | 622              | 527               | 1149             |
| 9         | 622              | 527               | 1149             |
| 10        | 622              | 527               | 1149             |
| 11        | 622              | 527               | 1149             |
| 12        | 622              | 527               | 1149             |
| 13        | 622              | 527               | 1149             |
| 14        | 622              | 527               | 1149             |
| 15        | 622              | 527               | 1149             |
| 16        | 622              | 527               | 1149             |
| 17        | 622              | 527               | 1149             |
| 18        | 622              | 527               | 1149             |
| 19        | 622              | 341               | 963              |
| 20        | 622              | 341               | 963              |
| 21        | 622              | 341               | 963              |
| 22        | 622              | 341               | 963              |
| 23        | 622              | 341               | 963              |
| 24        | 622              | 341               | 963              |
| 25        | 622              | 341               | 963              |
| 26        | 622              | 341               | 963              |
| 27        | 622              | 341               | 963              |

**Table S8.** Summary of the spatial characteristics in the considered scenarios

| Scenarios | Connectedness (%) | Flow distance (m) | GR Edge density<br>(m/m <sup>2</sup> ) | RG Edge density<br>(m/m <sup>2</sup> ) |
|-----------|-------------------|-------------------|----------------------------------------|----------------------------------------|
| 1         | 0.000             | 81.392            | 0.364                                  | 0.275                                  |
| 2         | 0.026             | 81.392            | 0.364                                  | 0.275                                  |
| 3         | 0.045             | 81.392            | 0.364                                  | 0.275                                  |
| 4         | 0.063             | 81.392            | 0.364                                  | 0.275                                  |
| 5         | 0.085             | 81.392            | 0.364                                  | 0.275                                  |
| 6         | 0.099             | 81.392            | 0.364                                  | 0.275                                  |
| 7         | 0.111             | 81.392            | 0.364                                  | 0.275                                  |
| 8         | 0.124             | 81.392            | 0.364                                  | 0.275                                  |
| 9         | 0.141             | 81.392            | 0.364                                  | 0.275                                  |
| 10        | 0.141             | 84.832            | 0.260                                  | 0.170                                  |
| 11        | 0.141             | 90.676            | 0.319                                  | 0.170                                  |
| 12        | 0.141             | 83.597            | 0.343                                  | 0.170                                  |
| 13        | 0.141             | 79.287            | 0.352                                  | 0.170                                  |
| 14        | 0.141             | 79.947            | 0.364                                  | 0.170                                  |
| 15        | 0.141             | 97.768            | 0.260                                  | 0.243                                  |
| 16        | 0.141             | 85.409            | 0.260                                  | 0.271                                  |
| 17        | 0.141             | 82.589            | 0.260                                  | 0.274                                  |
| 18        | 0.141             | 83.459            | 0.260                                  | 0.275                                  |
| 19        | 0.141             | 83.179            | 0.364                                  | 0.264                                  |
| 20        | 0.141             | 82.703            | 0.364                                  | 0.263                                  |
| 21        | 0.141             | 82.281            | 0.364                                  | 0.263                                  |
| 22        | 0.141             | 82.016            | 0.364                                  | 0.263                                  |
| 23        | 0.141             | 82.505            | 0.364                                  | 0.267                                  |
| 24        | 0.141             | 81.512            | 0.364                                  | 0.266                                  |
| 25        | 0.141             | 81.636            | 0.364                                  | 0.266                                  |
| 26        | 0.141             | 81.598            | 0.364                                  | 0.266                                  |
| 27        | 0.141             | 81.449            | 0.364                                  | 0.266                                  |

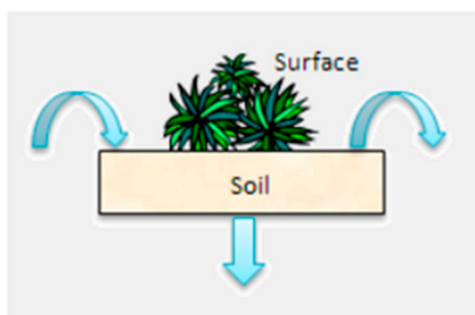

**Rain garden**

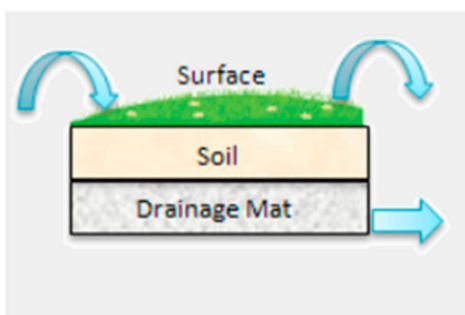

**Green roof**

**Fig. S1.** Schematic diagram of the rain garden and green roof<sup>[51]</sup>

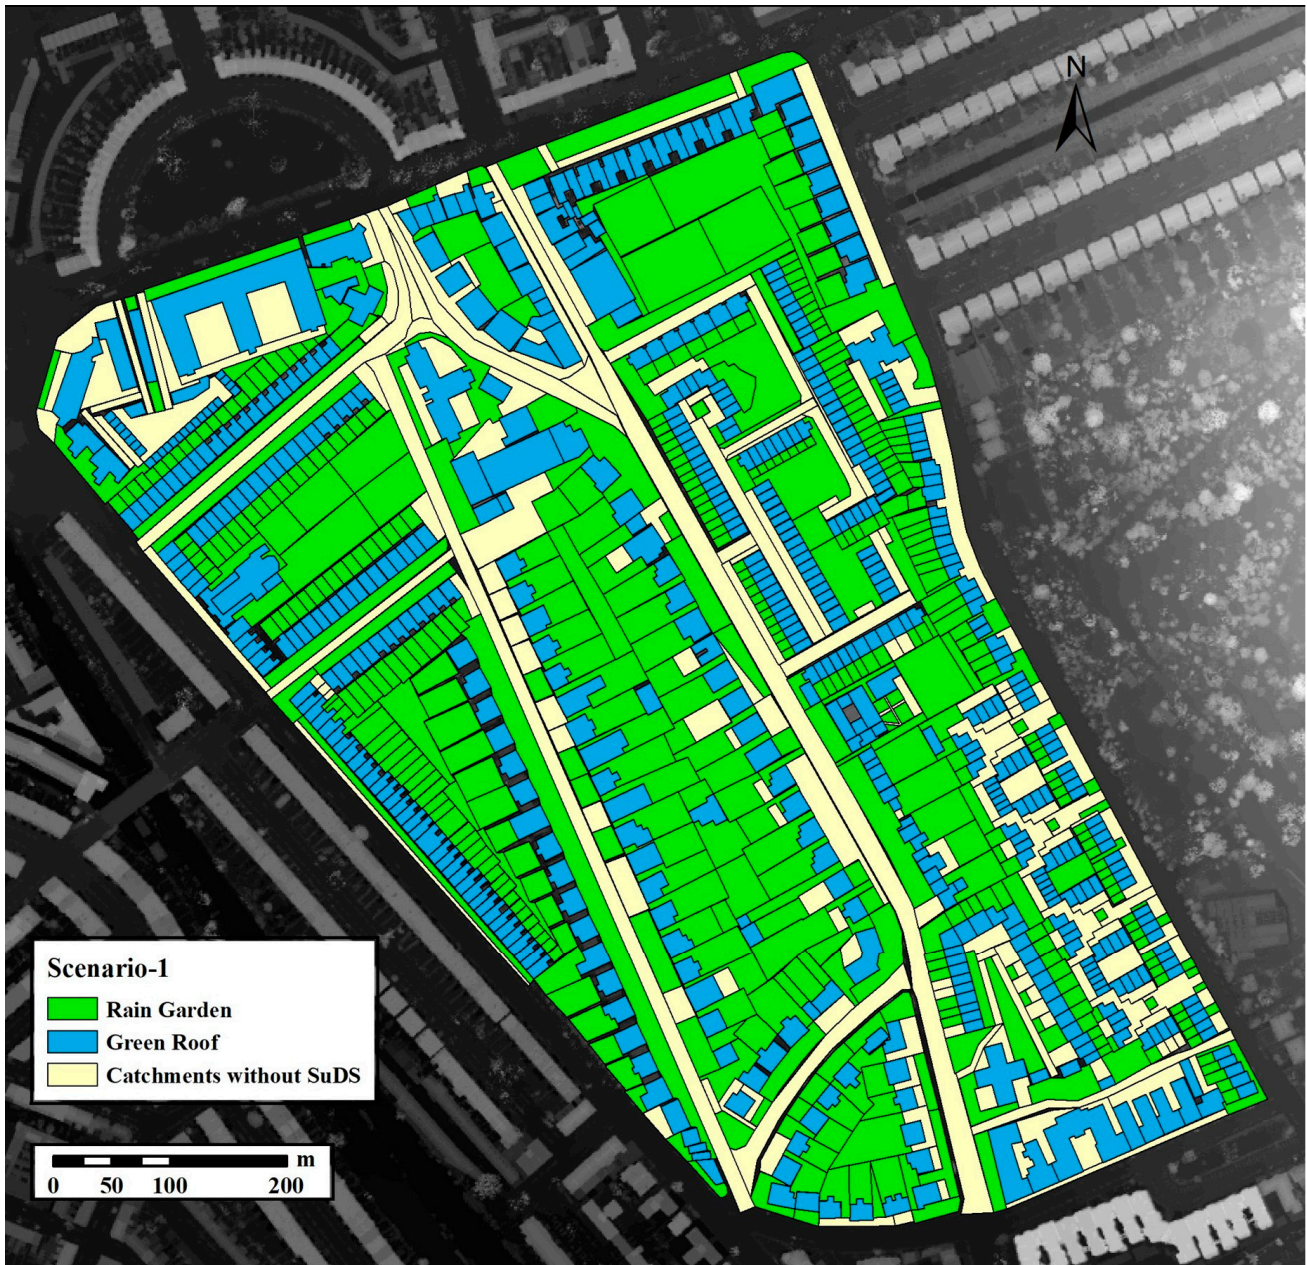

**Fig. S2.** The sketch map of Scenario 1

Scenario 1: One rain garden unit is applied on every mini-catchment of green land and one green roof unit is applied to each mini-catchment of buildings; no water transportation between SuDS components exists; no clustered SuDS component exists.

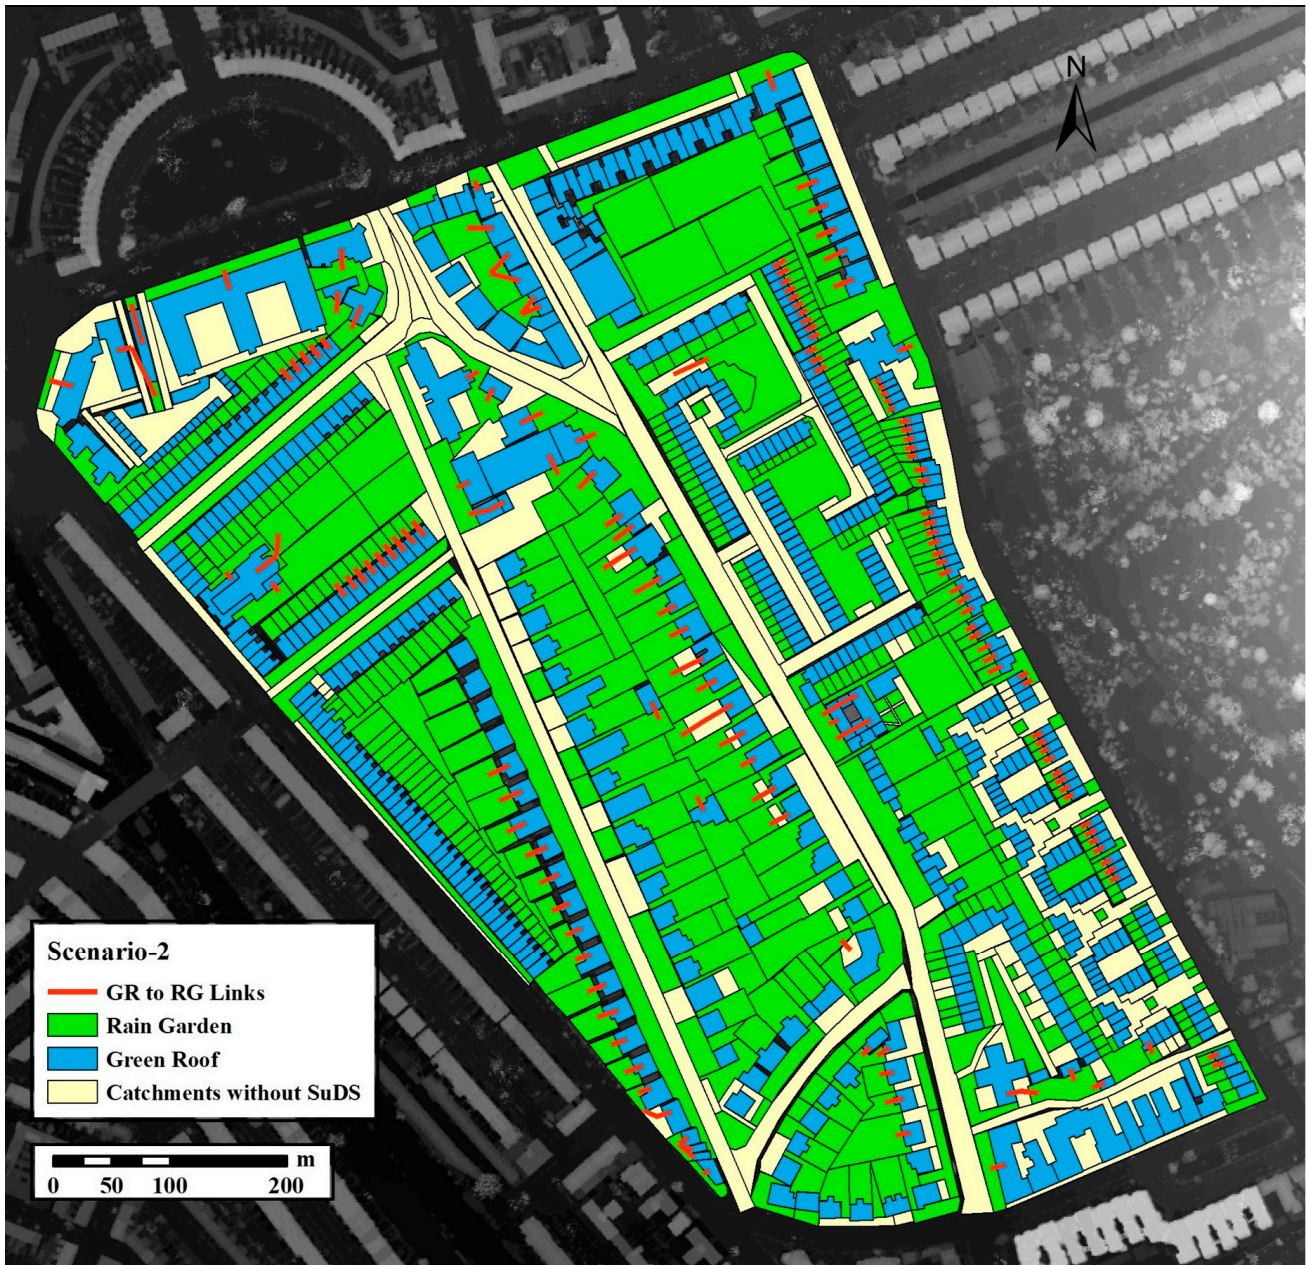

**Fig. S3.** The sketch map of Scenario 2

Scenario 2: One rain garden unit is applied on every mini-catchment of green land and one green roof unit is applied to each mini-catchment of buildings; the runoff from 151 green roofs is drained to nearby rain gardens; no clustered SuDS component exists.

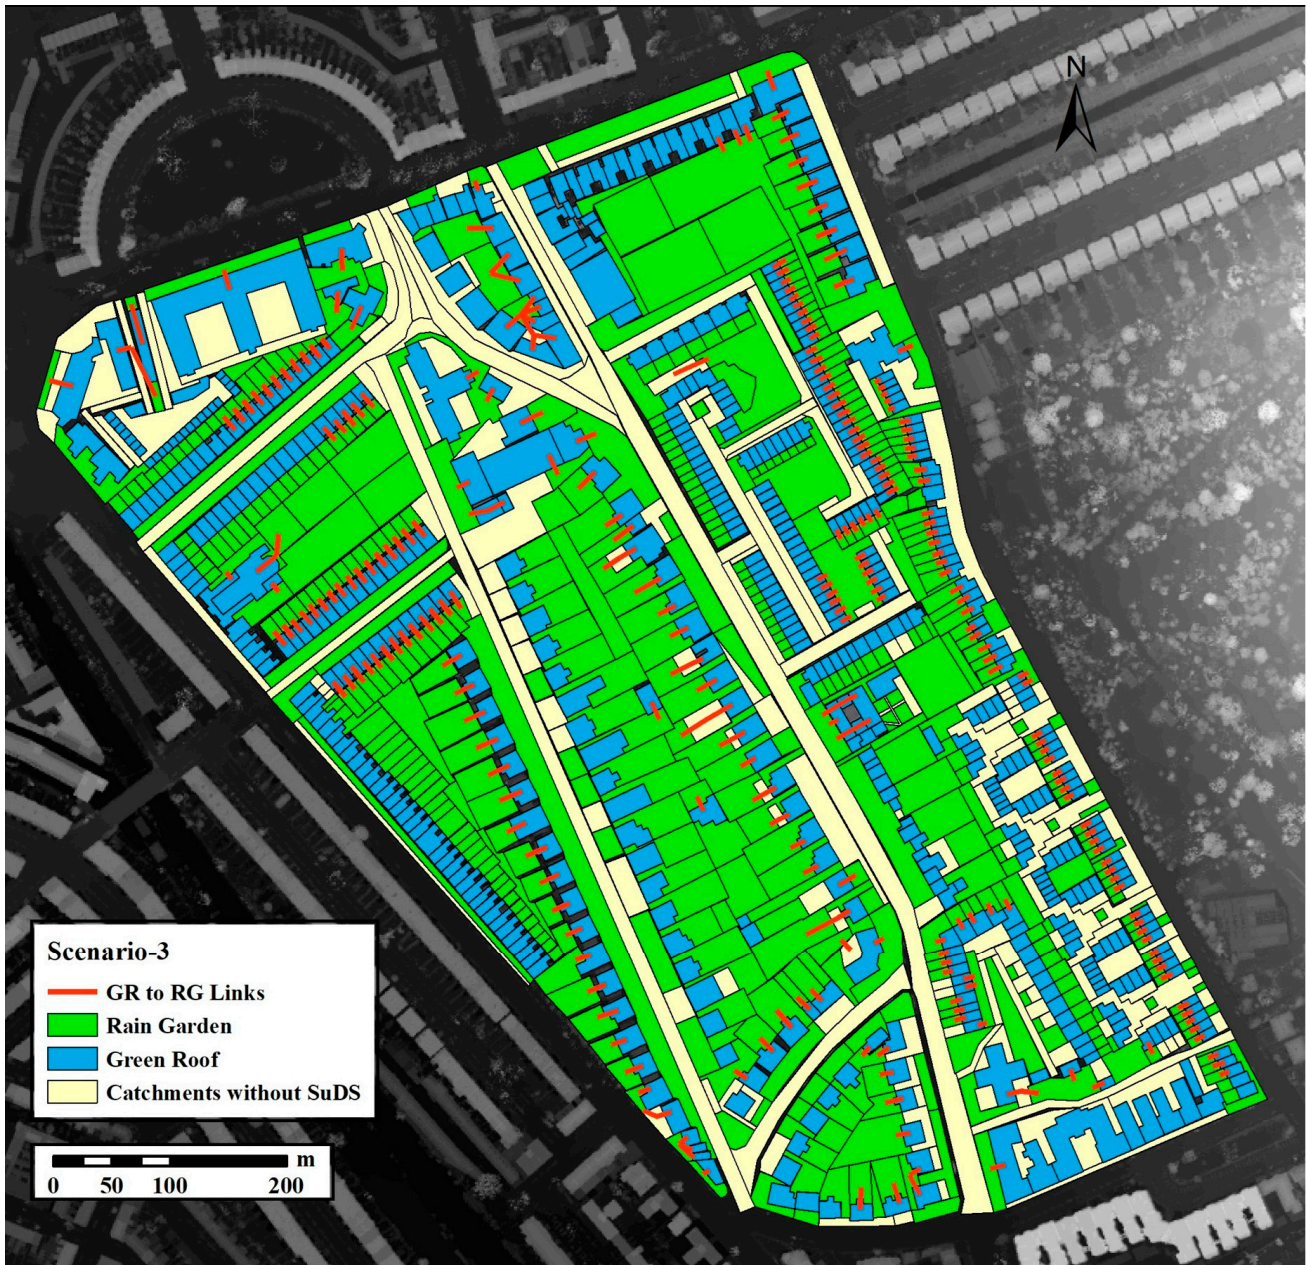

**Fig. S4.** The sketch map of Scenario 3

Scenario 3: One rain garden unit is applied on every mini-catchment of green land and one green roof unit is applied to each mini-catchment of buildings; the runoff from 275 green roofs is drained to nearby rain gardens; no clustered SuDS component exists.

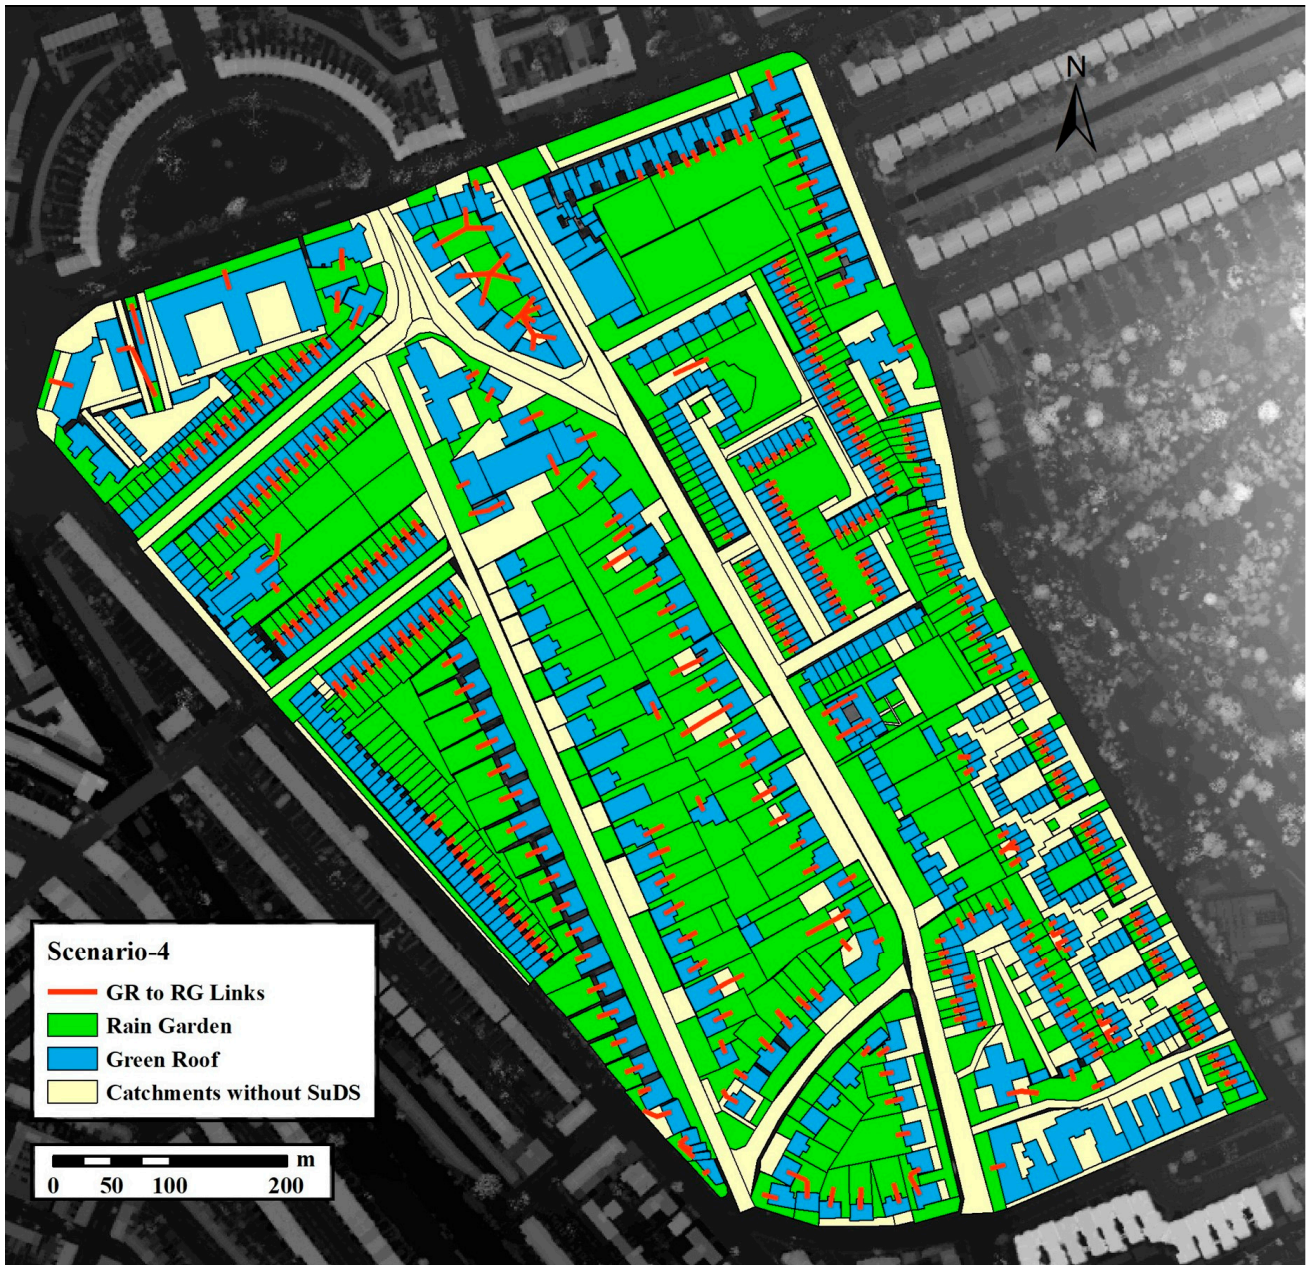

**Fig. S5.** The sketch map of Scenario 4

Scenario 4: One rain garden unit is applied on every mini-catchment of green land and one green roof unit is applied to each mini-catchment of buildings; the runoff from 395 green roofs is drained to nearby rain gardens; no clustered SuDS component exists.

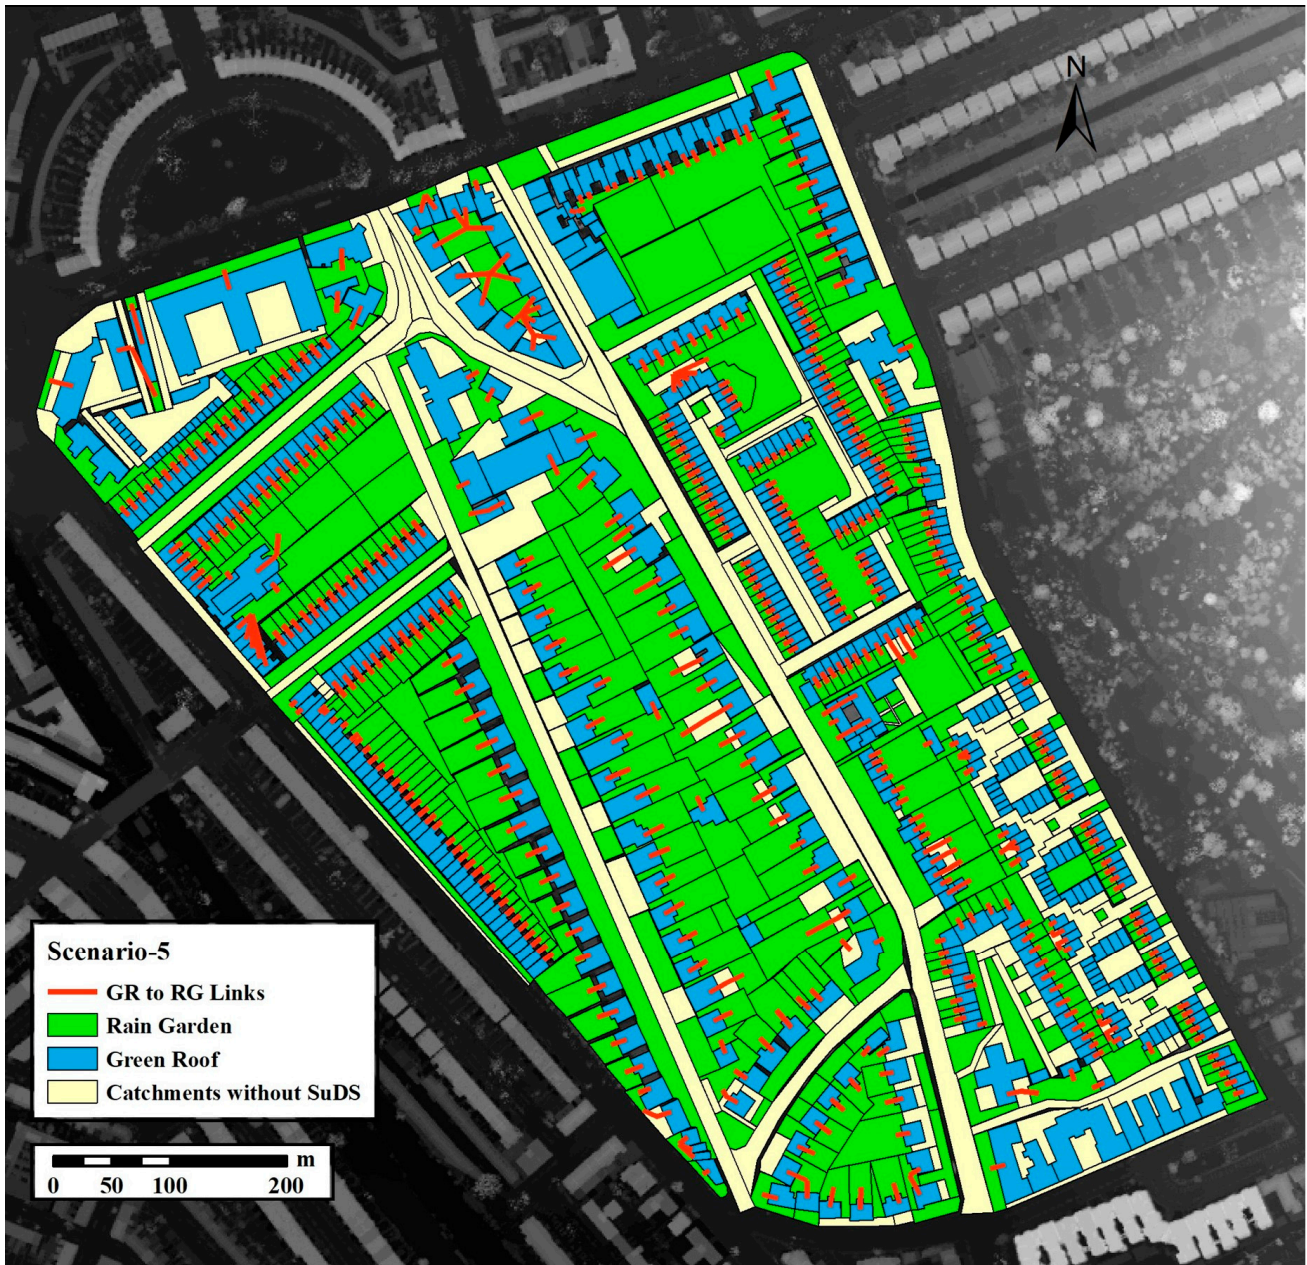

**Fig. S6.** The sketch map of Scenario 5

Scenario 5: One rain garden unit is applied on every mini-catchment of green land and one green roof unit is applied to each mini-catchment of buildings; the runoff from 526 green roofs is drained to nearby rain gardens; no clustered SuDS component exists.

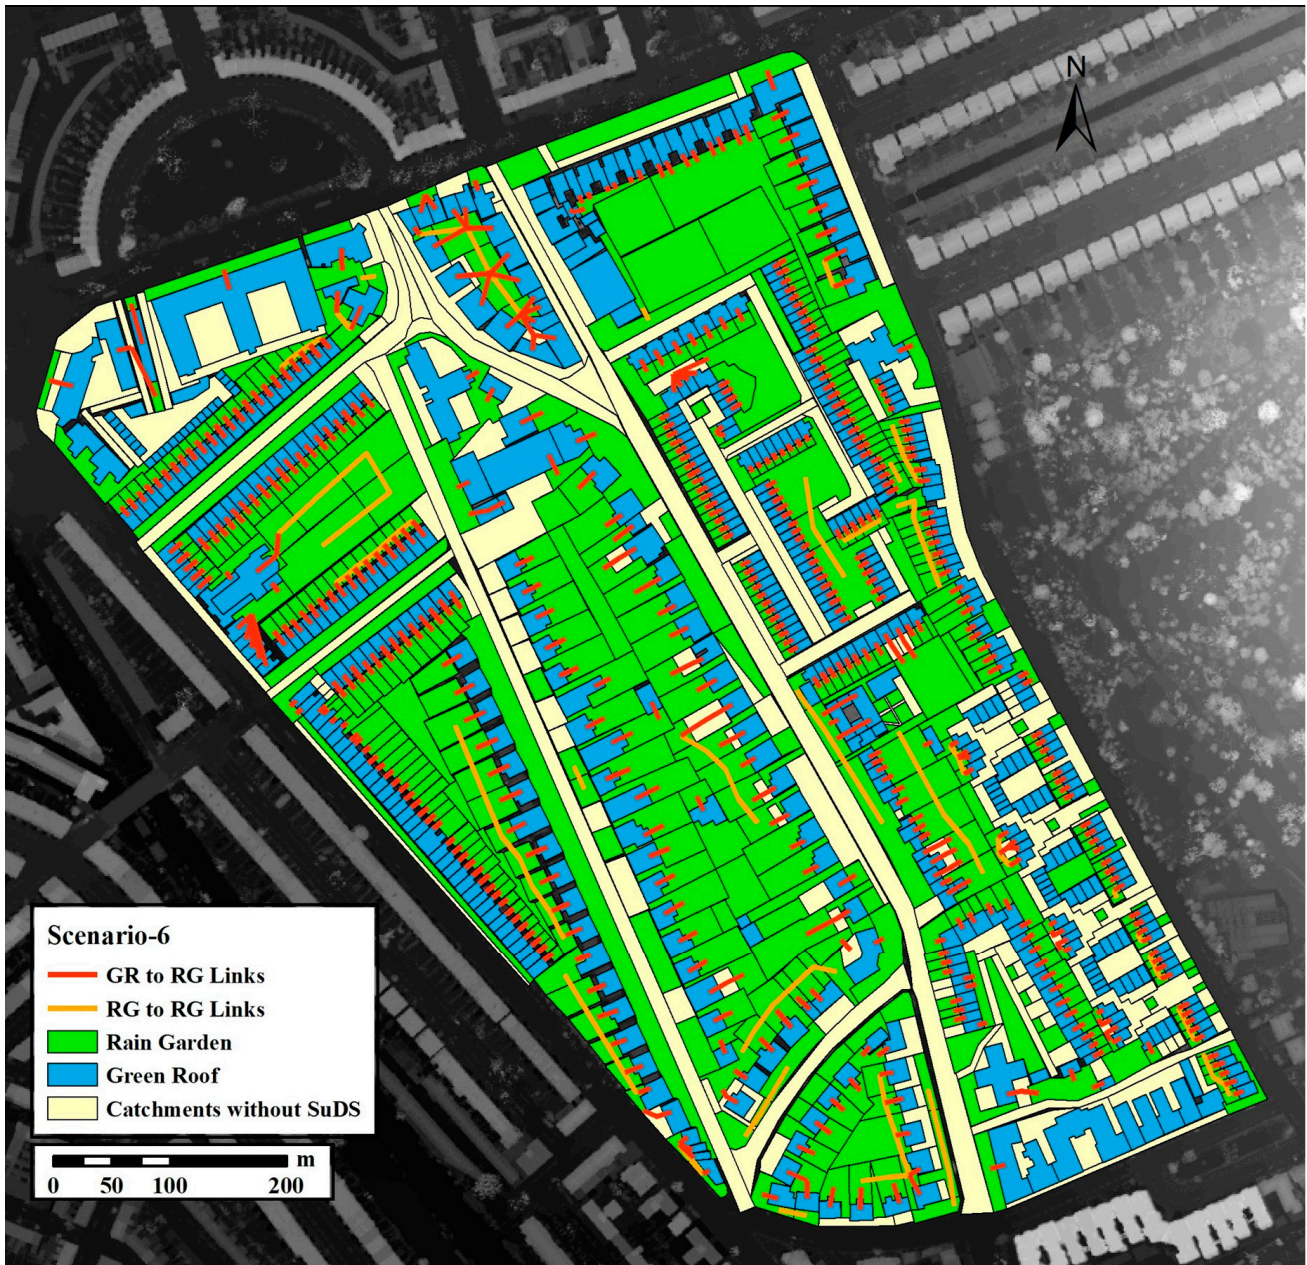

**Fig. S7.** The sketch map of Scenario 6

Scenario 6: One rain garden unit is applied on every mini-catchment of green land and one green roof unit is applied to each mini-catchment of buildings; the runoff from 526 green roofs is drained to nearby rain gardens; the water in 139 adjacent rain gardens flows in one direction to the next in turn; no clustered SuDS component exists.

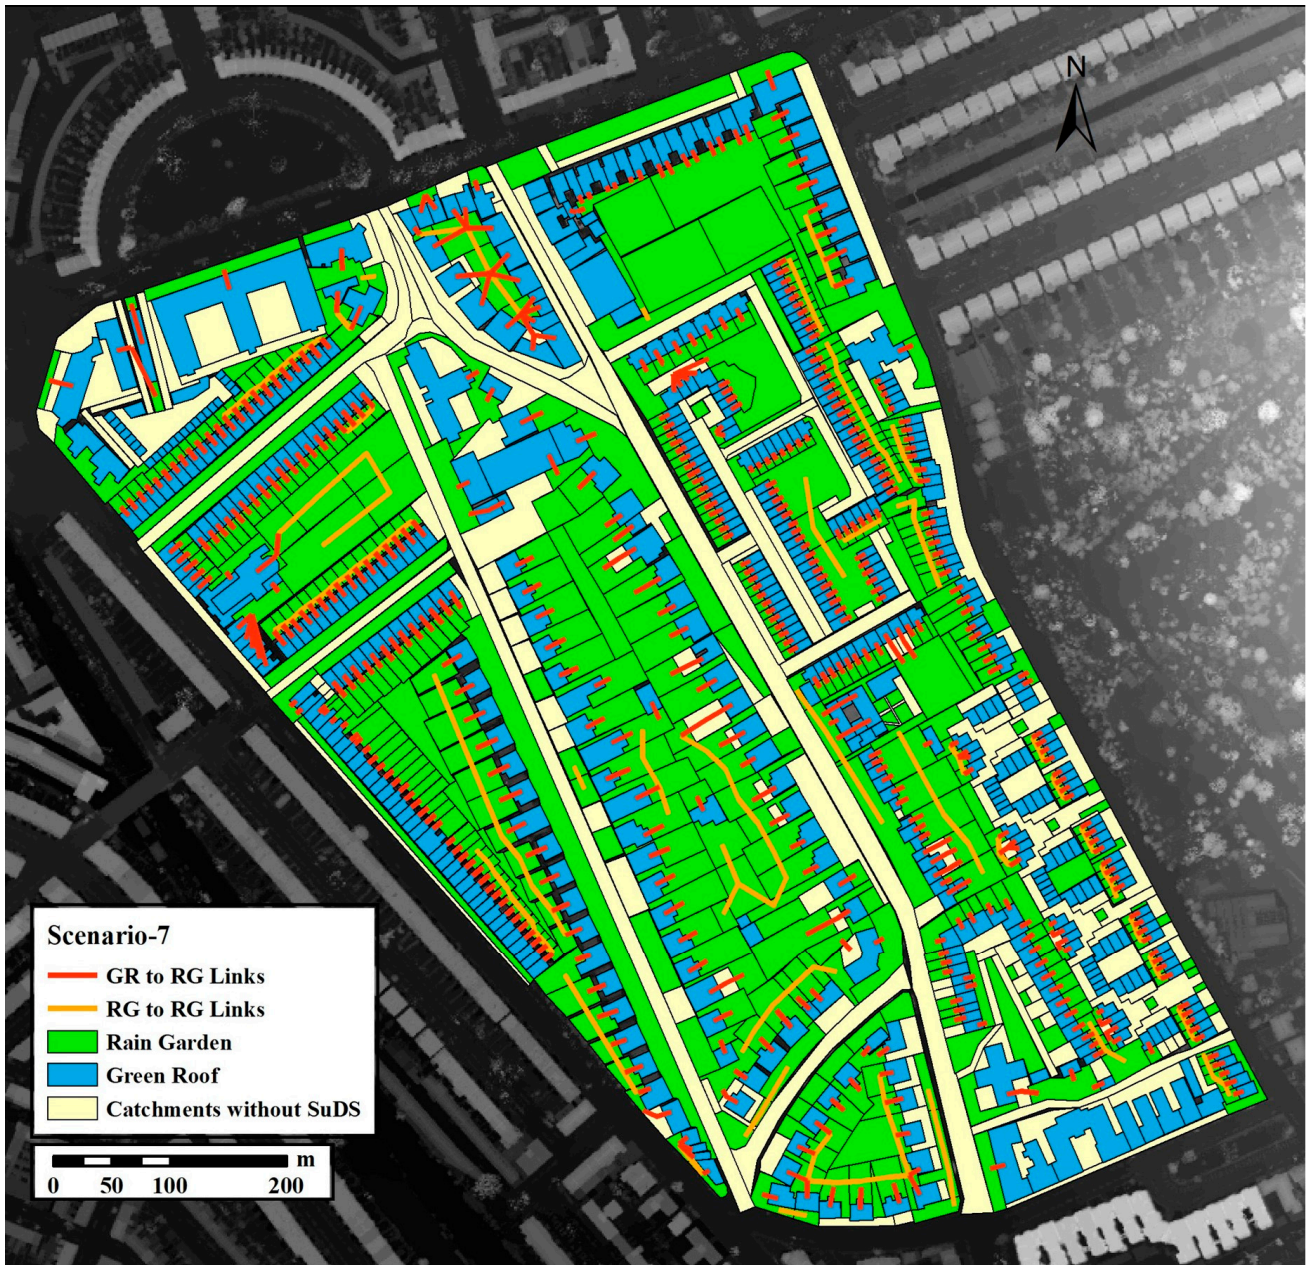

**Fig. S8.** The sketch map of Scenario 7

Scenario 7: One rain garden unit is applied on every mini-catchment of green land and one green roof unit is applied to each mini-catchment of buildings; the runoff from 526 green roofs is drained to nearby rain gardens; the water in 235 adjacent rain gardens flows in one direction to the next in turn; no clustered SuDS component exists.

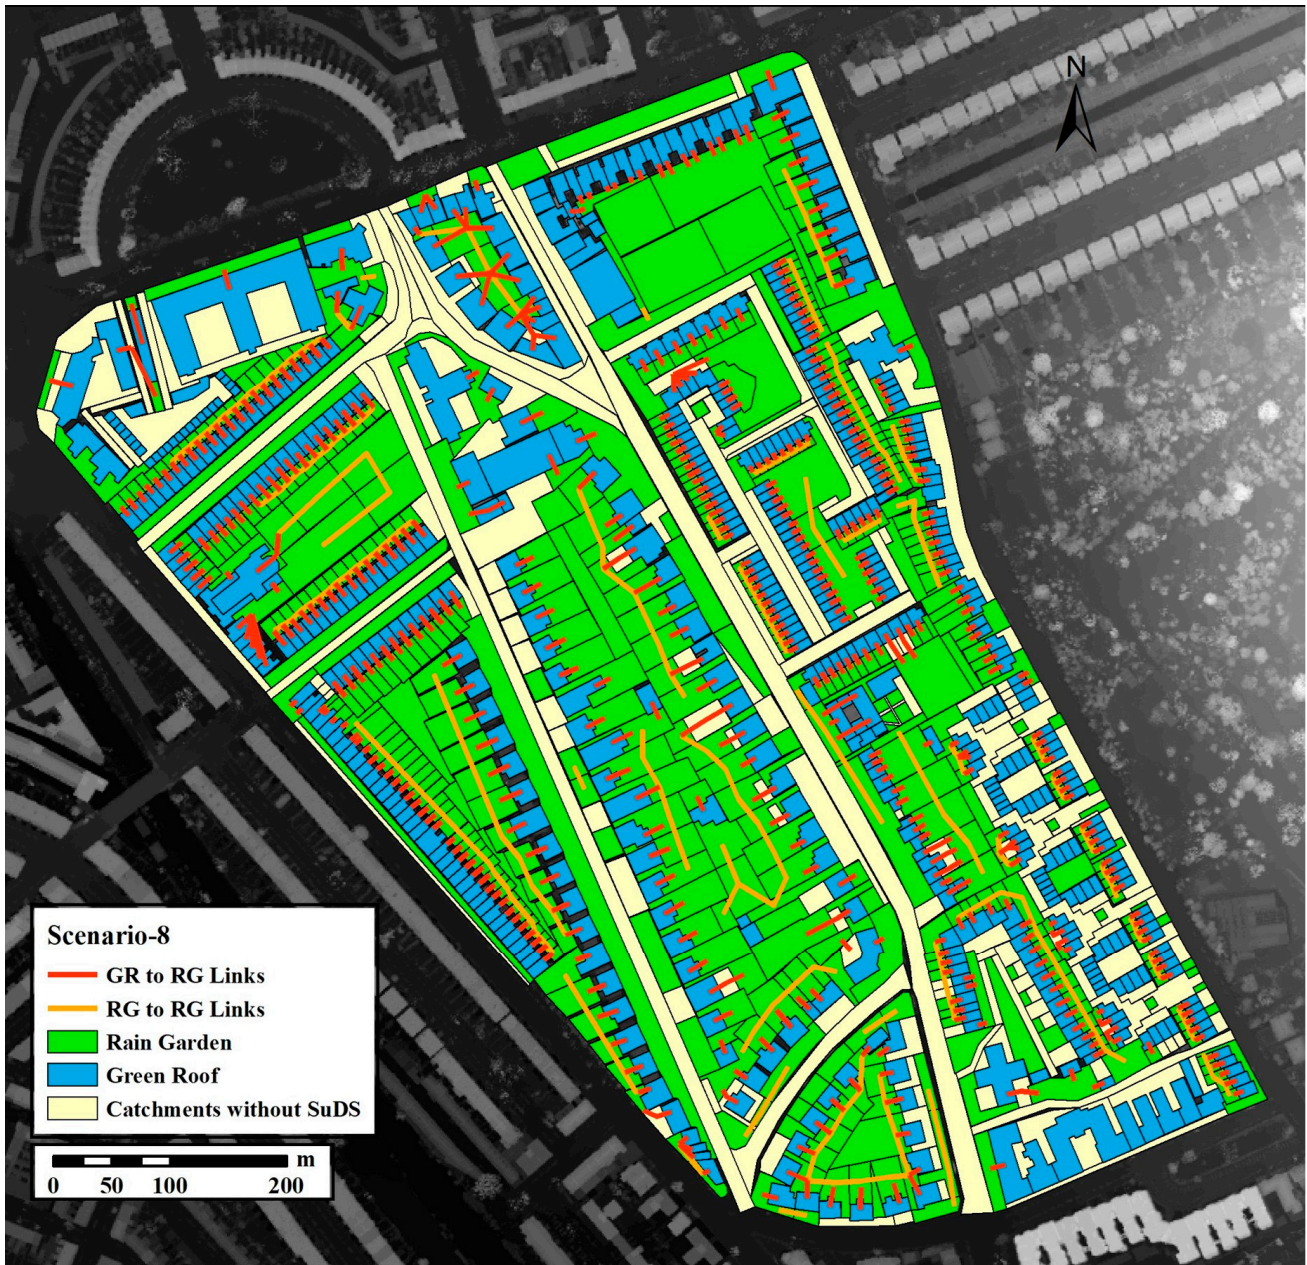

**Fig. S9.** The sketch map of Scenario 8

Scenario 8: One rain garden unit is applied on every mini-catchment of green land and one green roof unit is applied to each mini-catchment of buildings; the runoff from 526 green roofs is drained to nearby rain gardens; the water in 315 adjacent rain gardens flows in one direction to the next in turn; no clustered SuDS component exists.

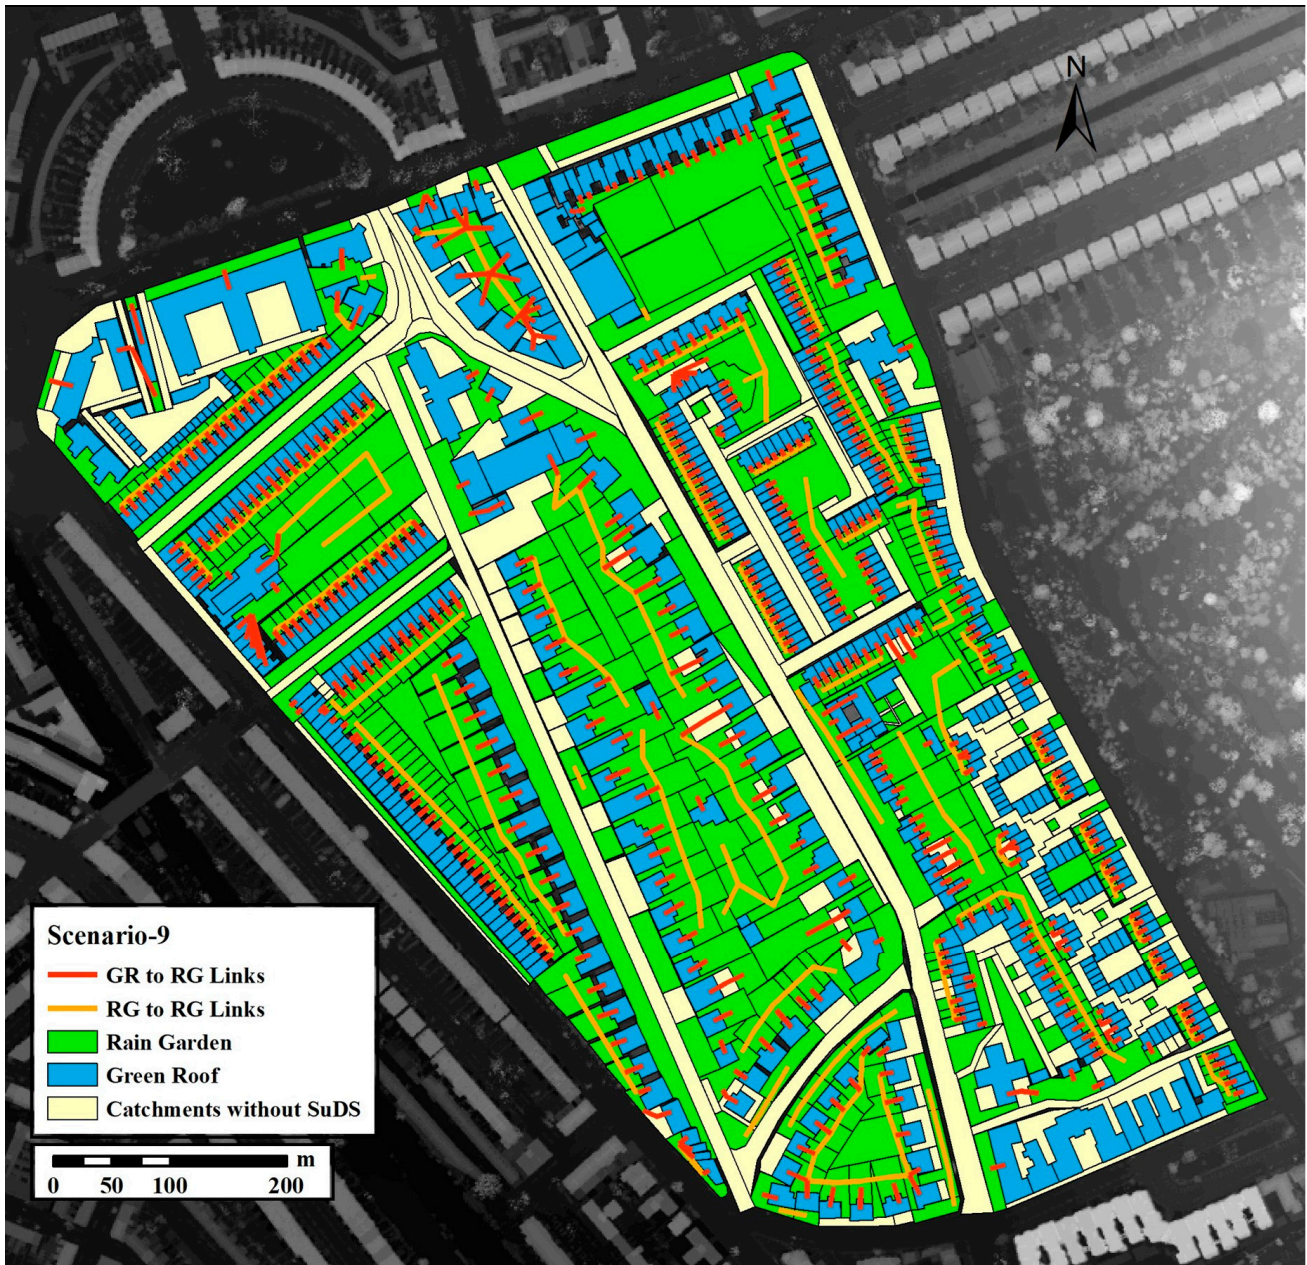

**Fig. S10.** The sketch map of Scenario 9

Scenario 9: One rain garden unit is applied on every mini-catchment of green land and one green roof unit is applied to each mini-catchment of buildings; the runoff from 526 green roofs is drained to nearby rain gardens; the water in 422 adjacent rain gardens flows in one direction to the next in turn; no clustered SuDS component exists.

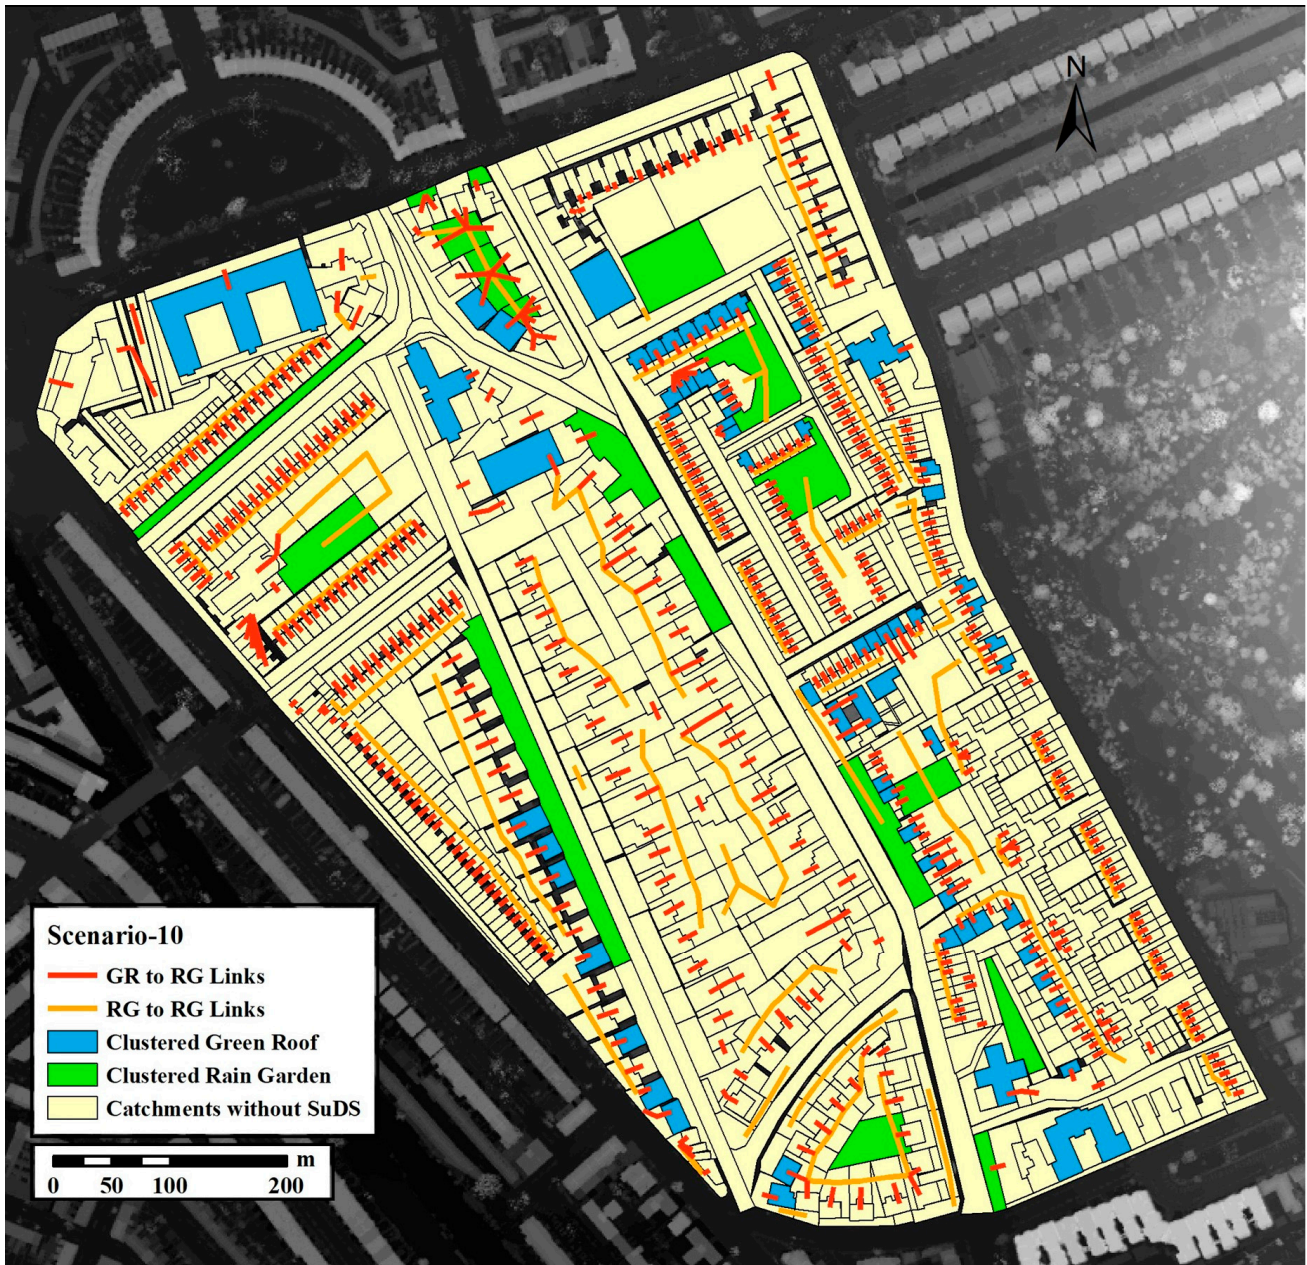

**Fig. S11.** The sketch map of Scenario 10

Scenario 10: 622 green roofs in each subcatchment are clustered in 69 bigger mini-catchments of buildings, and 527 rain gardens are clustered in 18 bigger mini-catchments of green land; the runoff from 526 building roofs is drained to nearby green land; the water in 422 of the adjacent green land flows in one direction to the next in turn.

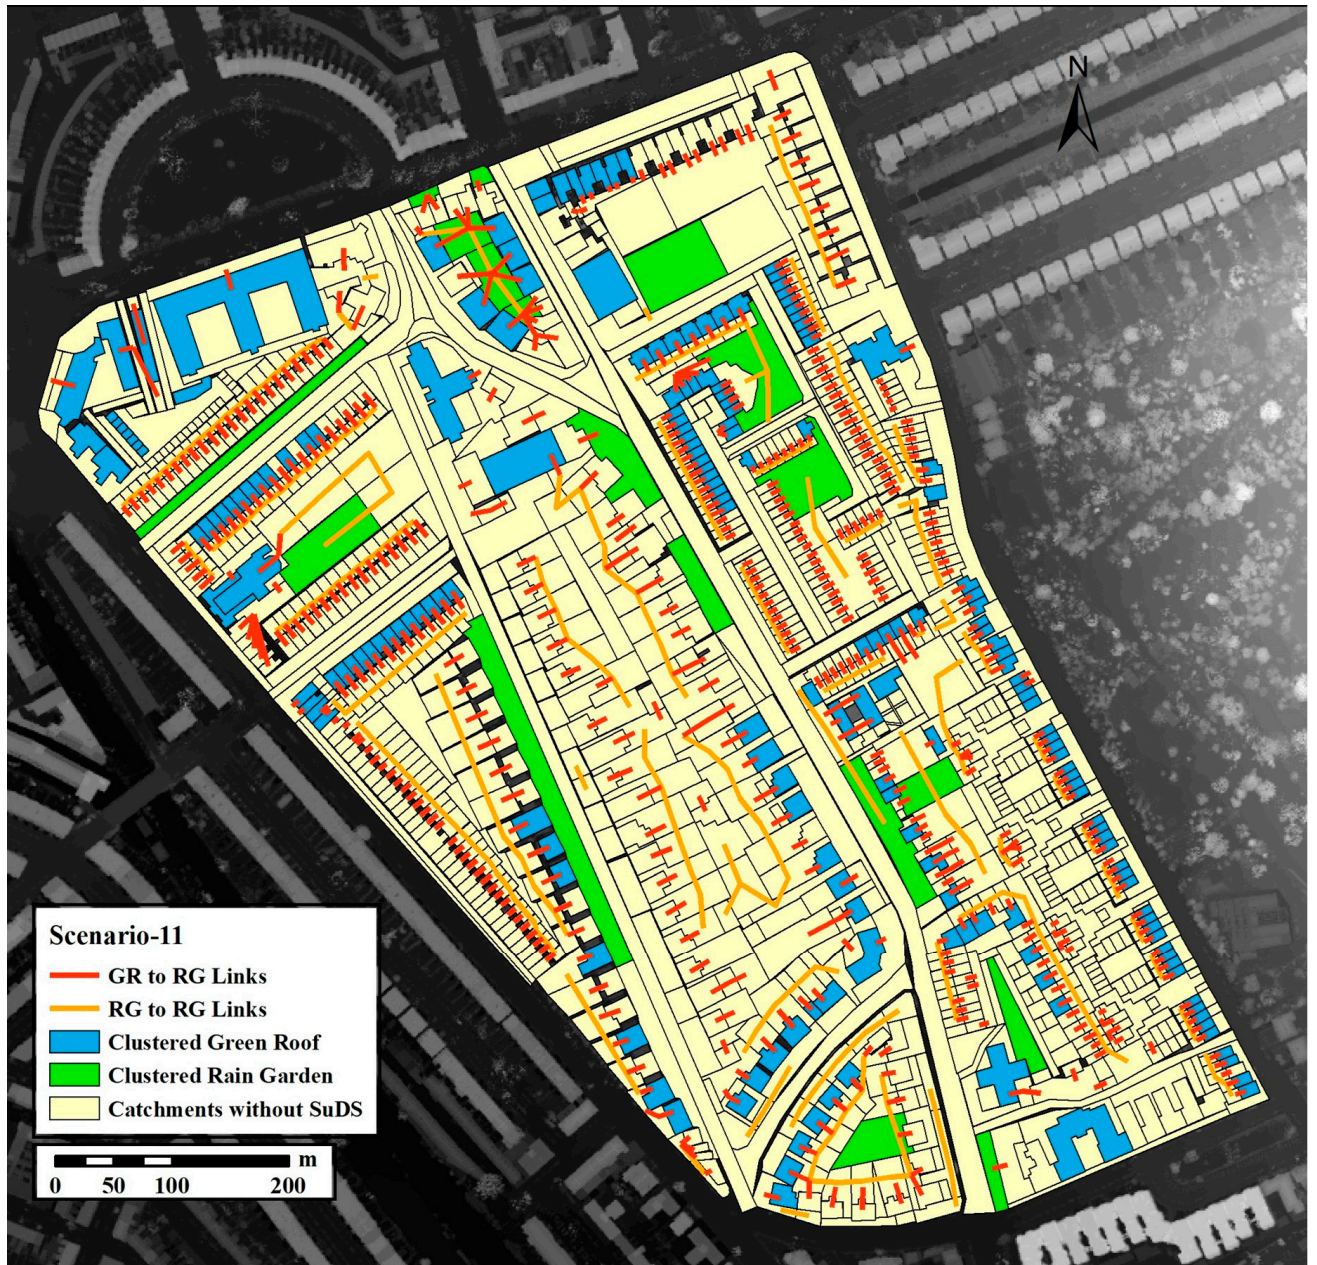

**Fig. S12.** The sketch map of Scenario 11

Scenario 11: 489 green roofs in each subcatchment are clustered in 69 bigger mini-catchments of buildings, and 527 rain gardens are clustered in 18 bigger mini-catchments of green land; the runoff from 526 building roofs is drained to nearby green land; the water in 422 of the adjacent green land flows in one direction to the next in turn.

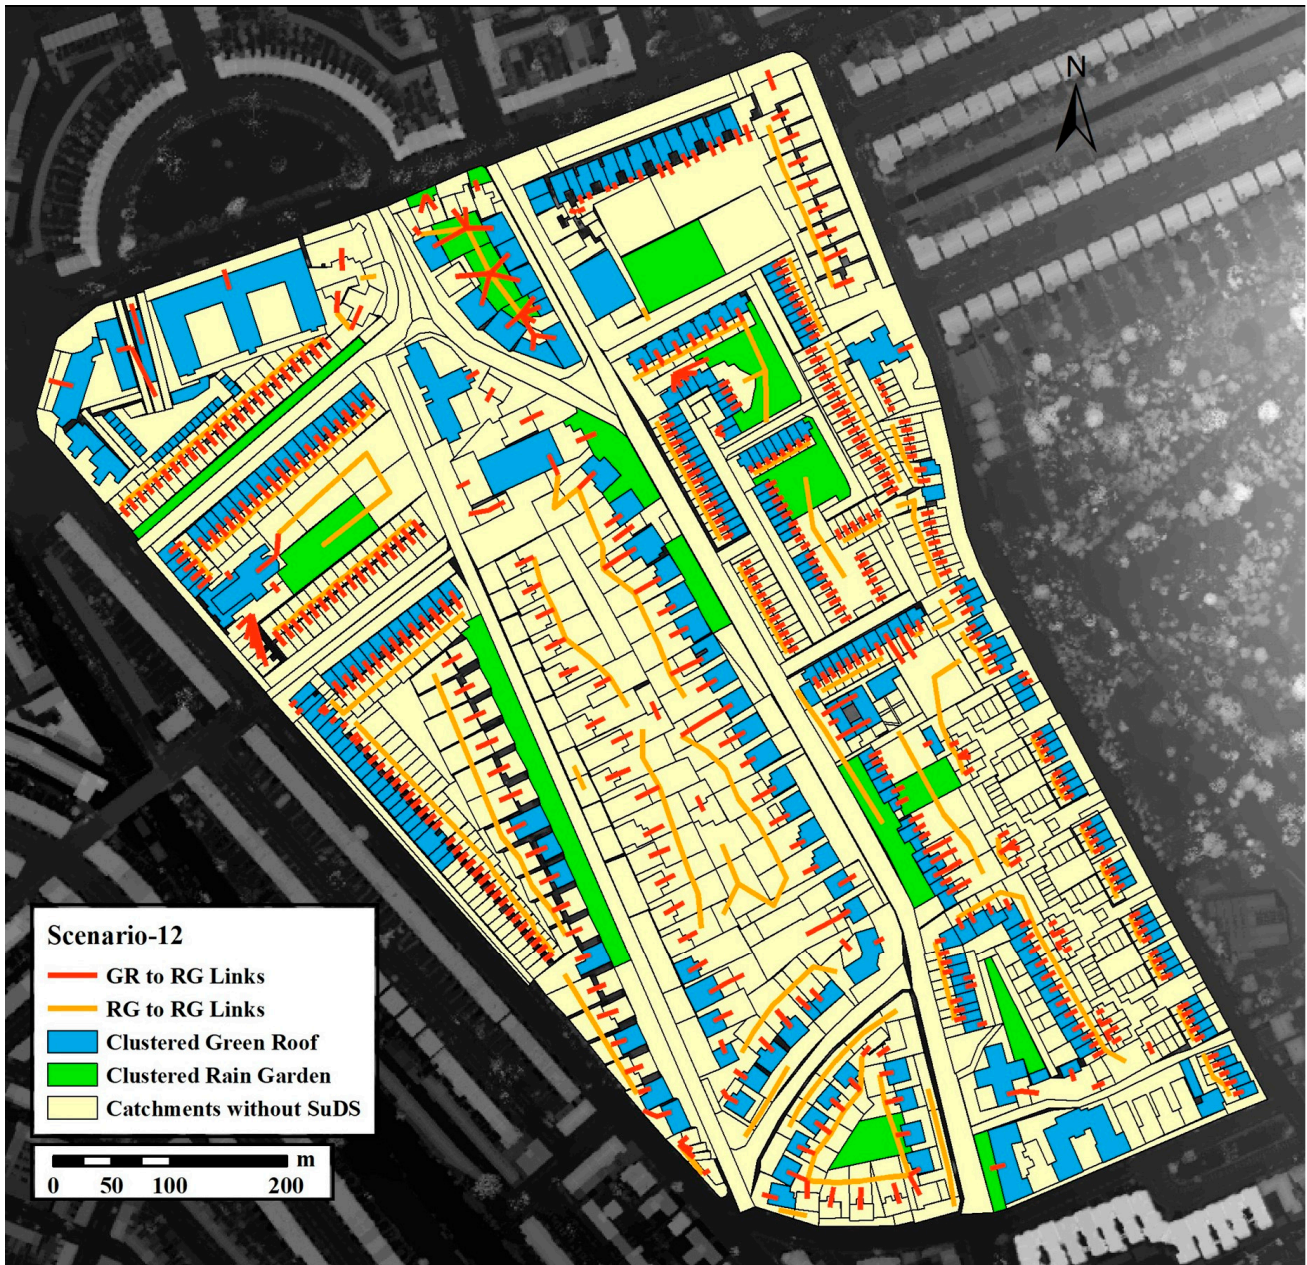

**Fig. S13.** The sketch map of Scenario 12

Scenario 12: 355 green roofs in each subcatchment are clustered in 69 bigger mini-catchments of buildings, and 527 rain gardens are clustered in 18 bigger mini-catchments of green land; the runoff from 526 building roofs is drained to nearby green land; the water in 422 of the adjacent green land flows in one direction to the next in turn.

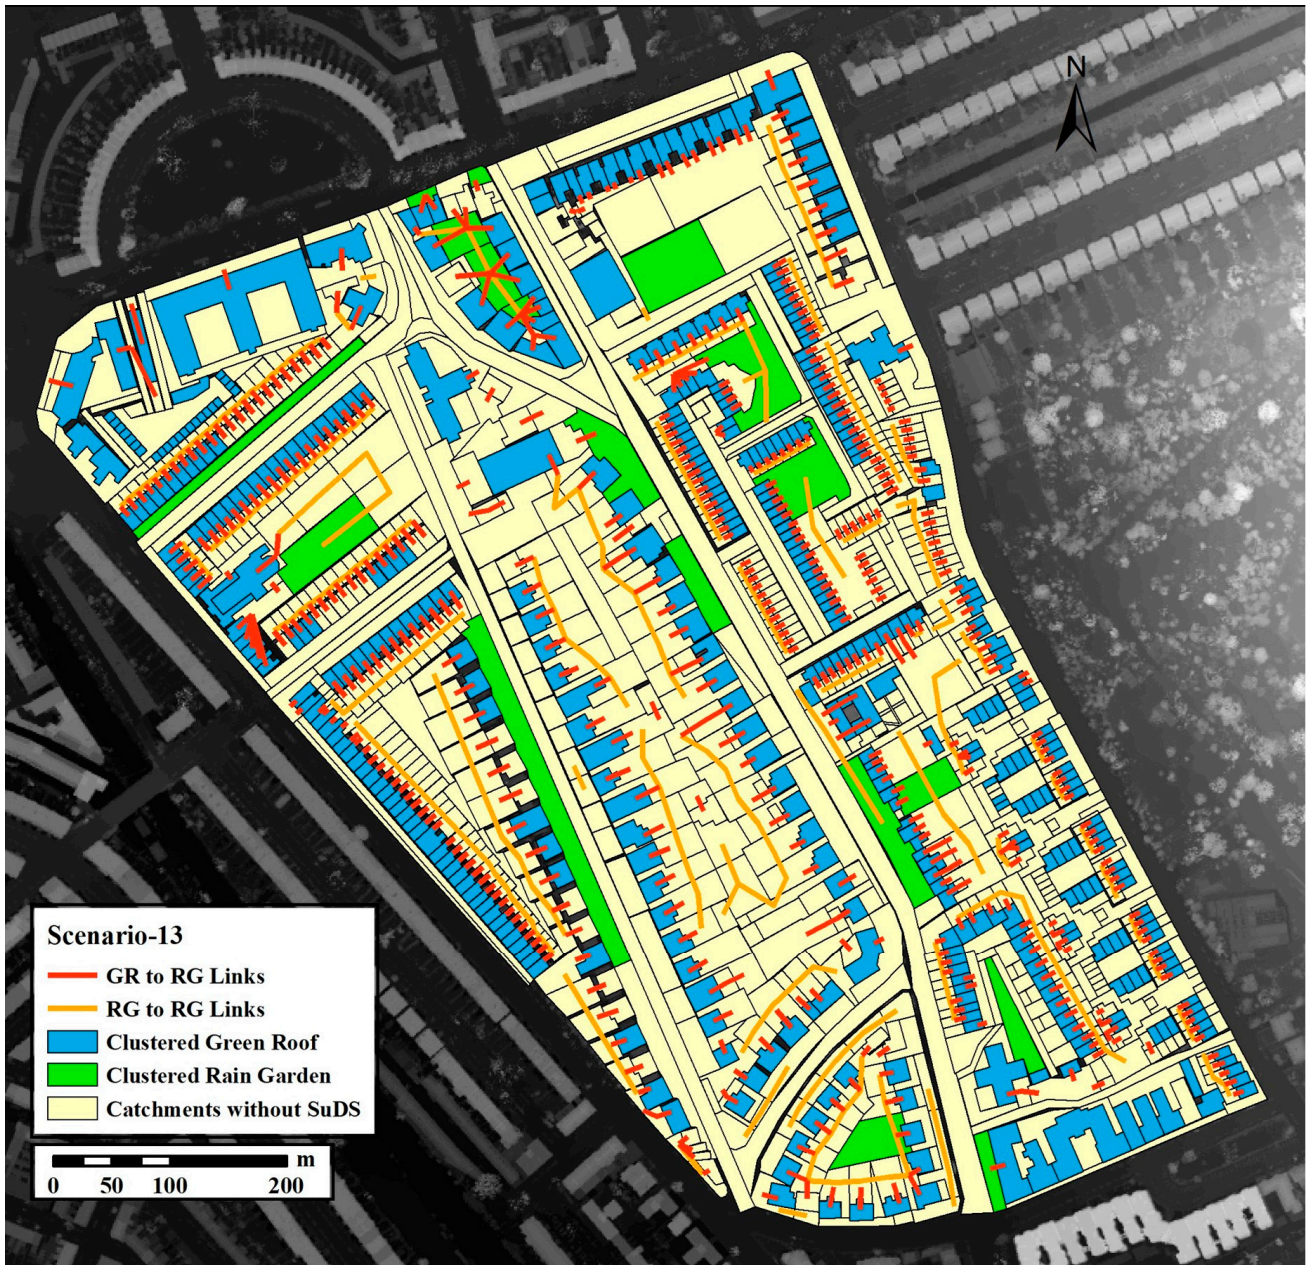

**Fig. S14.** The sketch map of Scenario 13

Scenario 13: 214 green roofs in each subcatchment are clustered in 69 bigger mini-catchments of buildings, and 527 rain gardens are clustered in 18 bigger mini-catchments of green land; the runoff from 526 building roofs is drained to nearby green land; the water in 422 of the adjacent green land flows in one direction to the next in turn.

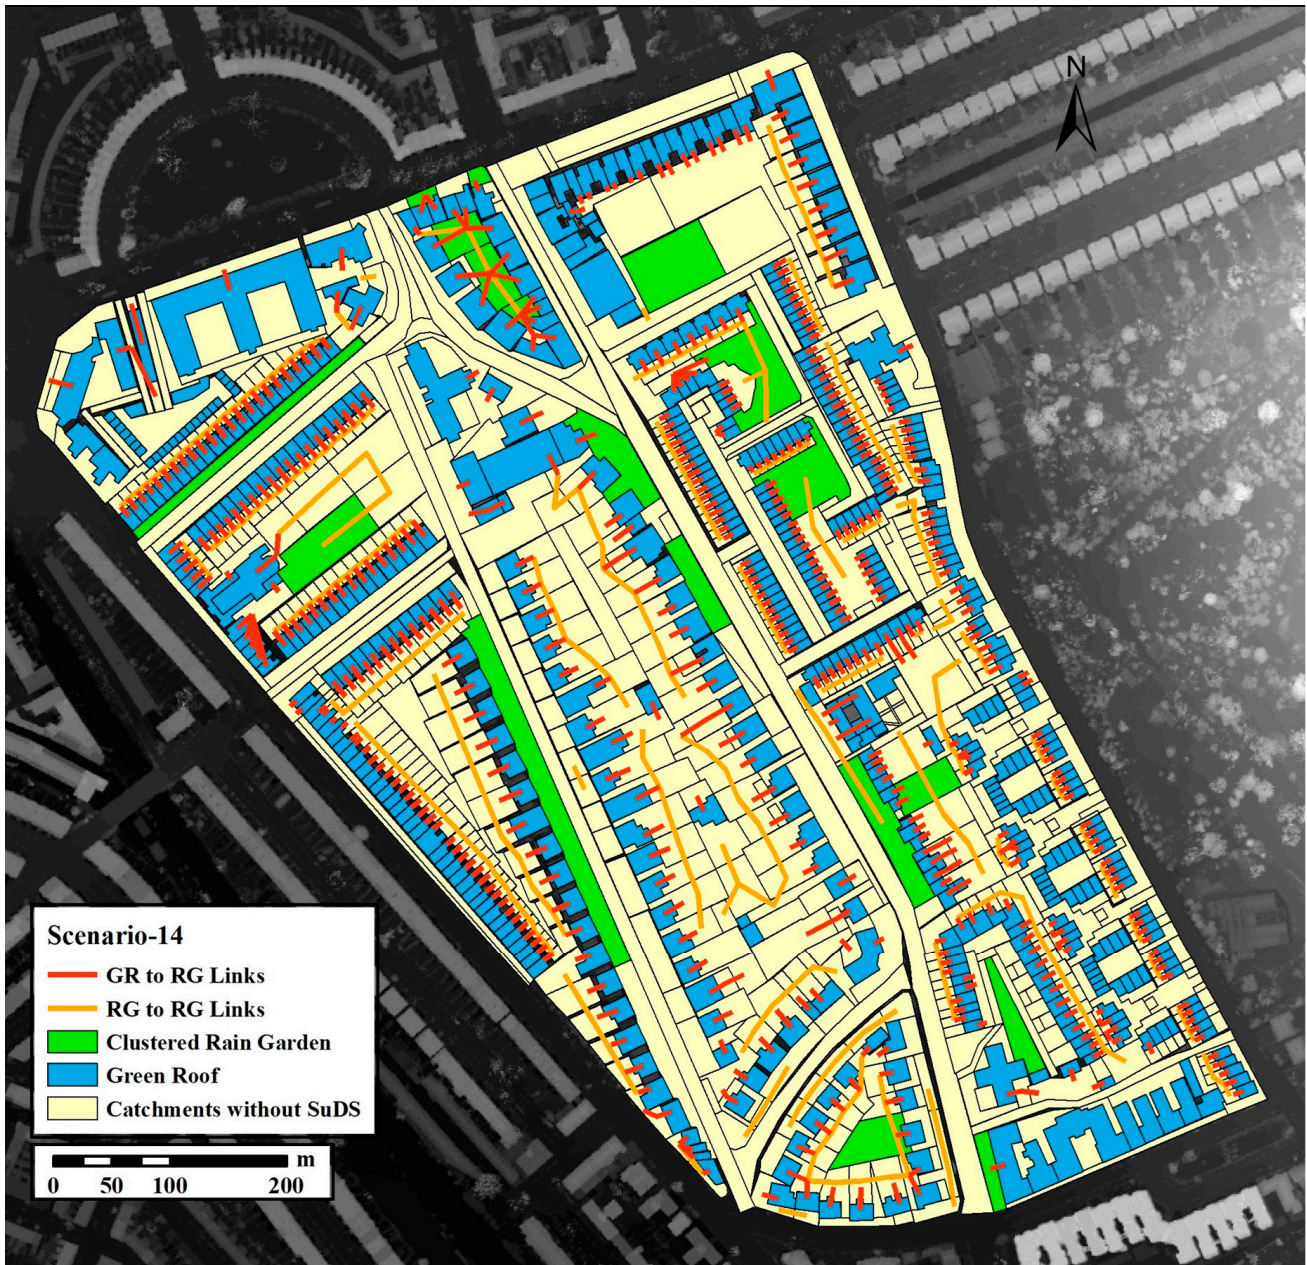

**Fig. S15.** The sketch map of Scenario 14

Scenario 14: No green roof in each subcatchment is clustered, and 527 rain gardens are clustered in 18 bigger mini-catchments of green land; the runoff from 526 building roofs is drained to nearby green land; the water in 422 of the adjacent green land flows in one direction to the next in turn.

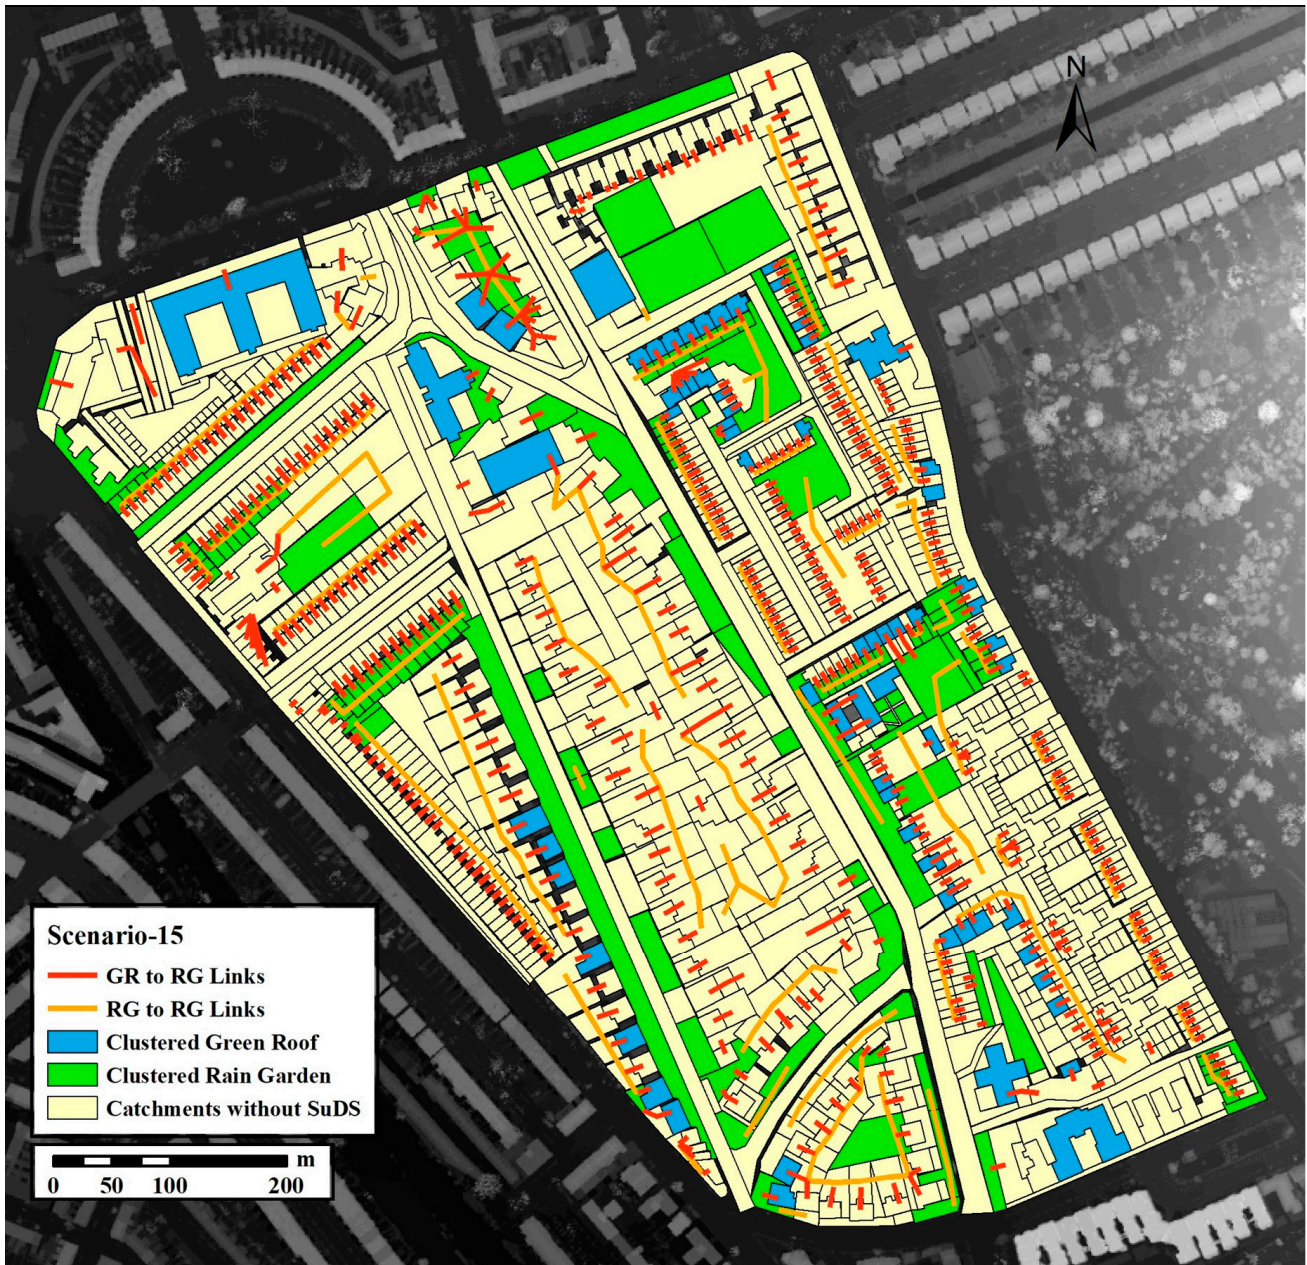

**Fig. S16.** The sketch map of Scenario 15

Scenario 15: 396 rain gardens in each subcatchment are clustered in 18 bigger mini-catchments of green land, and 622 green roofs are clustered in 69 bigger mini-catchments of buildings; the runoff from 526 building roofs is drained to nearby green land; the water in 422 of the adjacent green land flows in one direction to the next in turn.

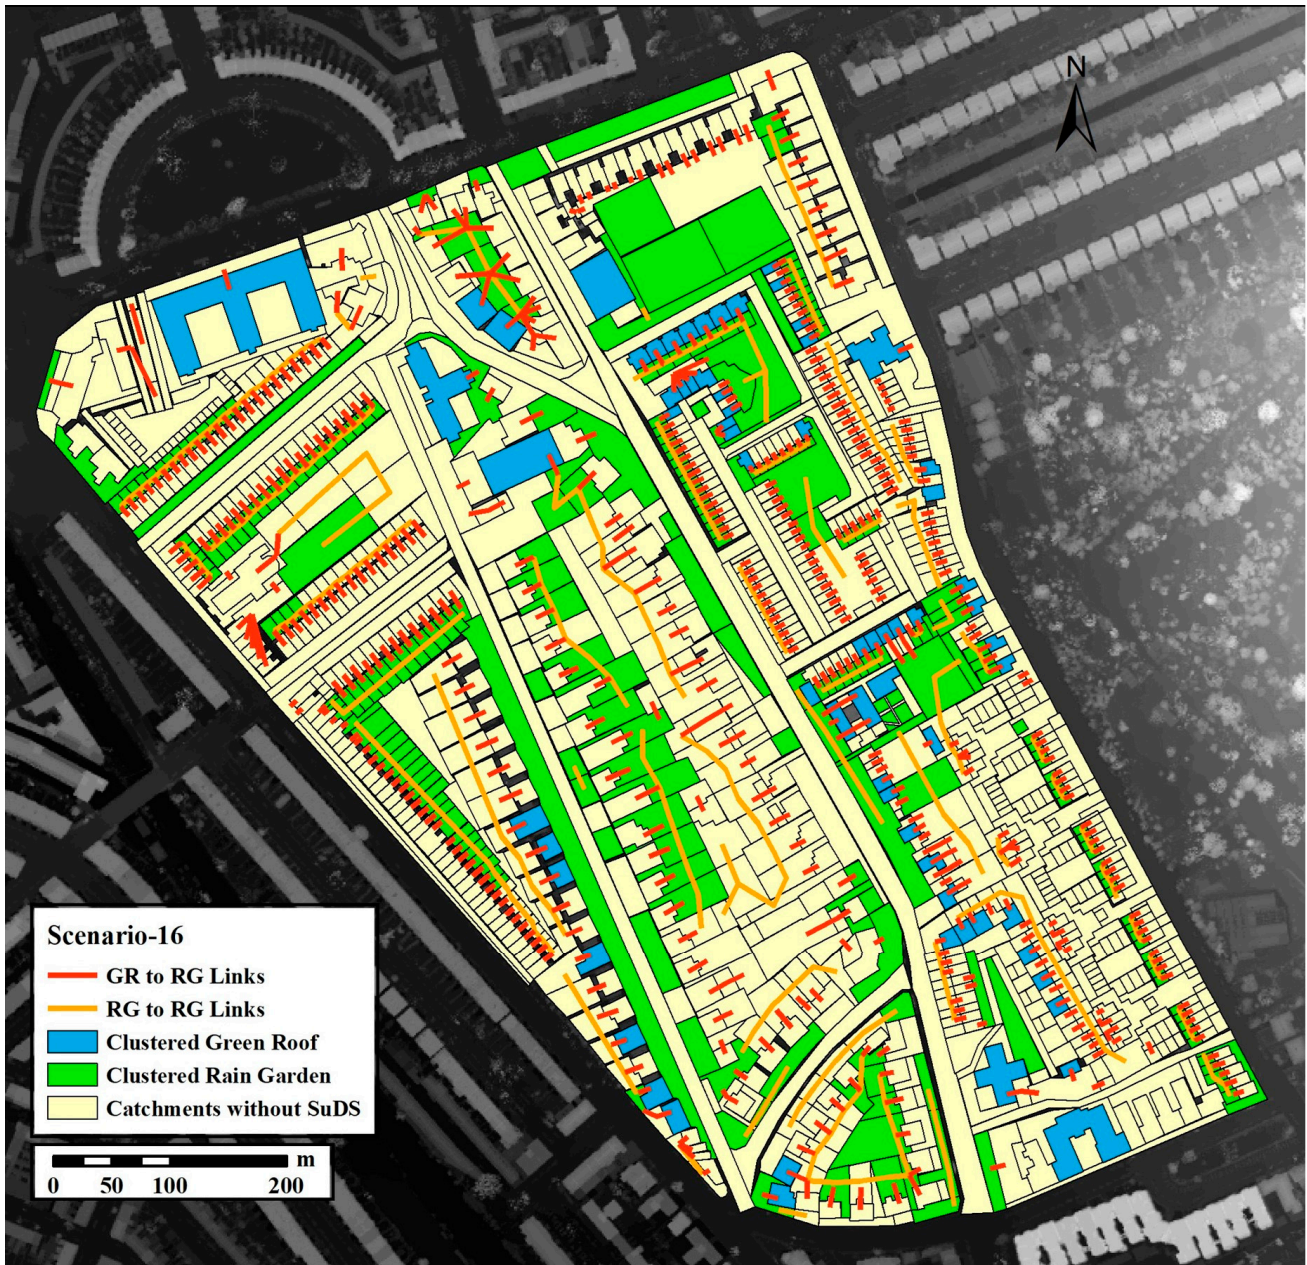

**Fig. S17.** The sketch map of Scenario 16

Scenario 16: 270 rain gardens in each subcatchment are clustered in 18 bigger mini-catchments of green land, and 622 green roofs are clustered in 69 bigger mini-catchments of buildings; the runoff from 526 building roofs is drained to nearby green land; the water in 422 of the adjacent green land flows in one direction to the next in turn.

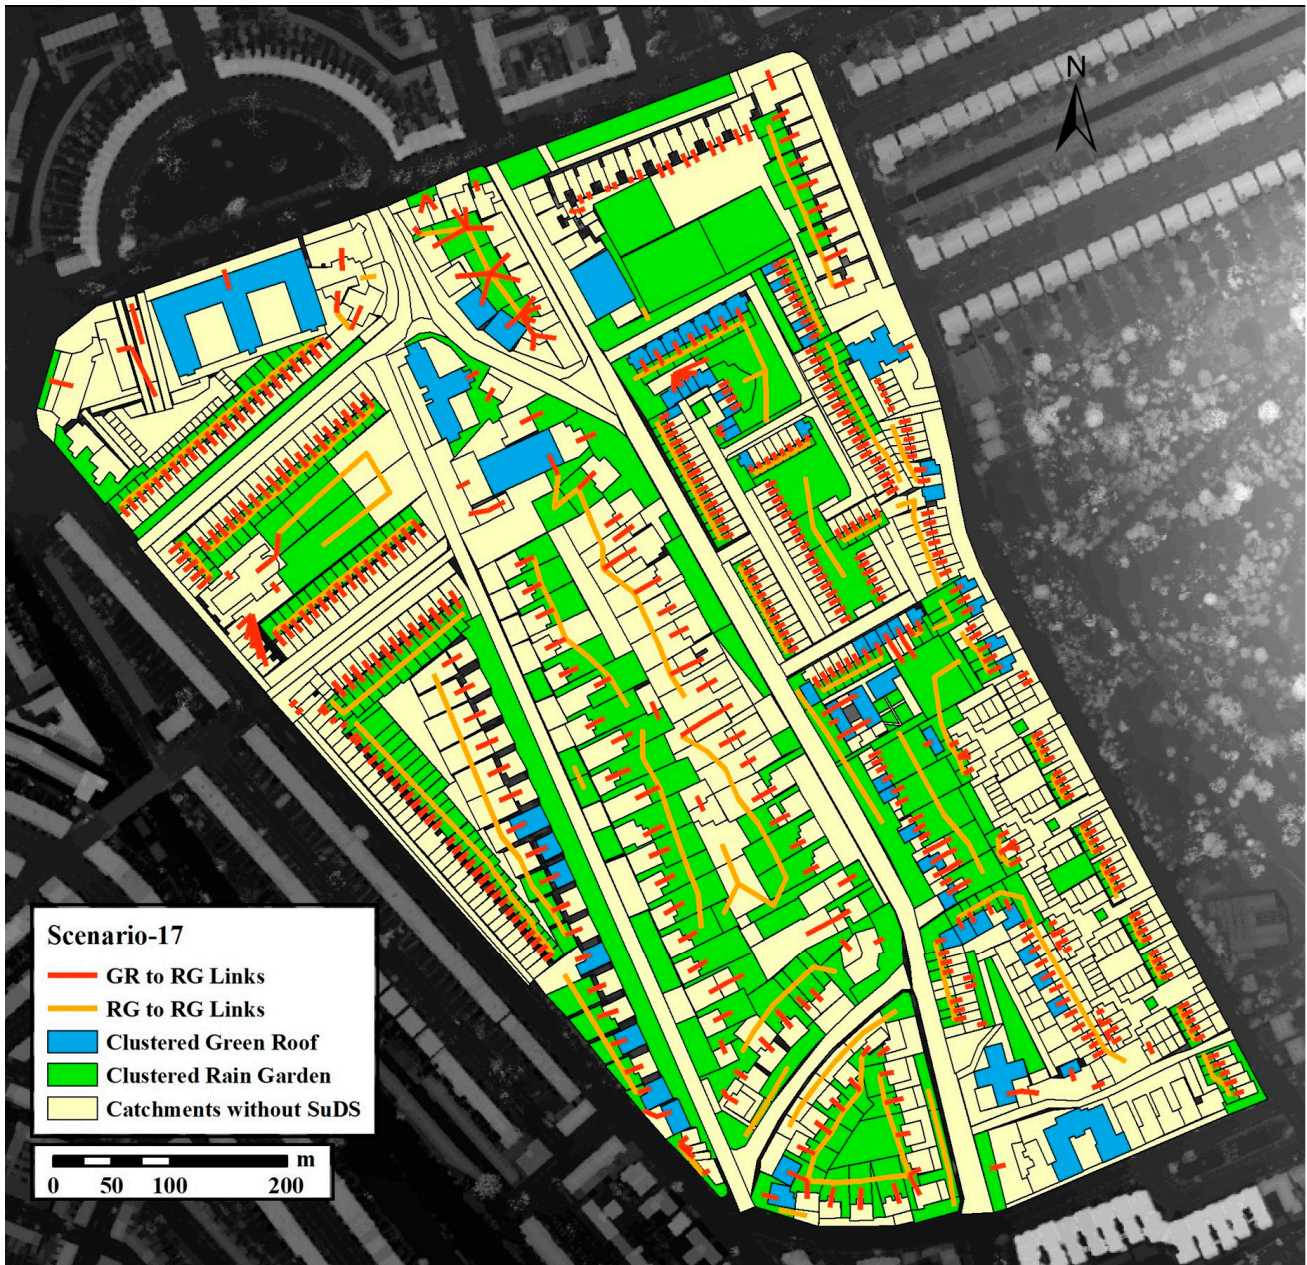

**Fig. S18.** The sketch map of Scenario 17

Scenario 17: 166 rain gardens in each subcatchment are clustered in 18 bigger mini-catchments of green land, and 622 green roofs are clustered in 69 bigger mini-catchments of buildings; the runoff from 526 building roofs is drained to nearby green land; the water in 422 of the adjacent green land flows in one direction to the next in turn.

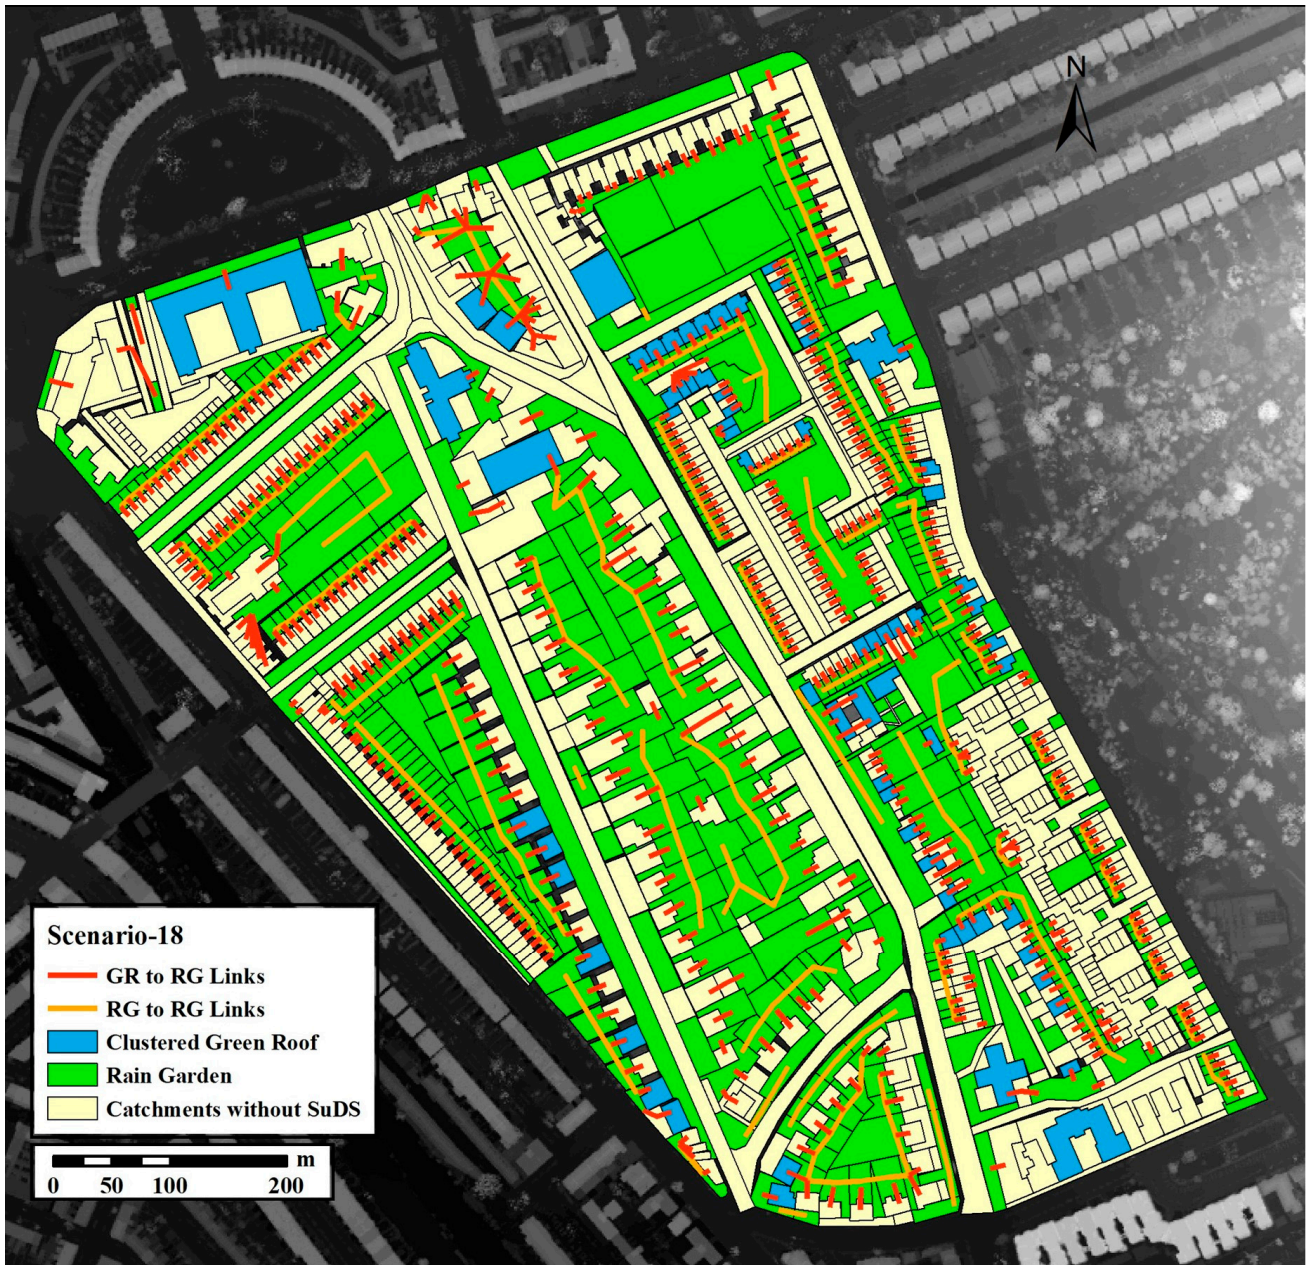

**Fig. S19.** The sketch map of Scenario 18

Scenario 18: No rain garden in each subcatchment is clustered, and 622 green roofs are clustered in 69 bigger mini-catchments of buildings; the runoff from 526 building roofs is drained to nearby green land; the water in 422 of the adjacent green land flows in one direction to the next in turn.

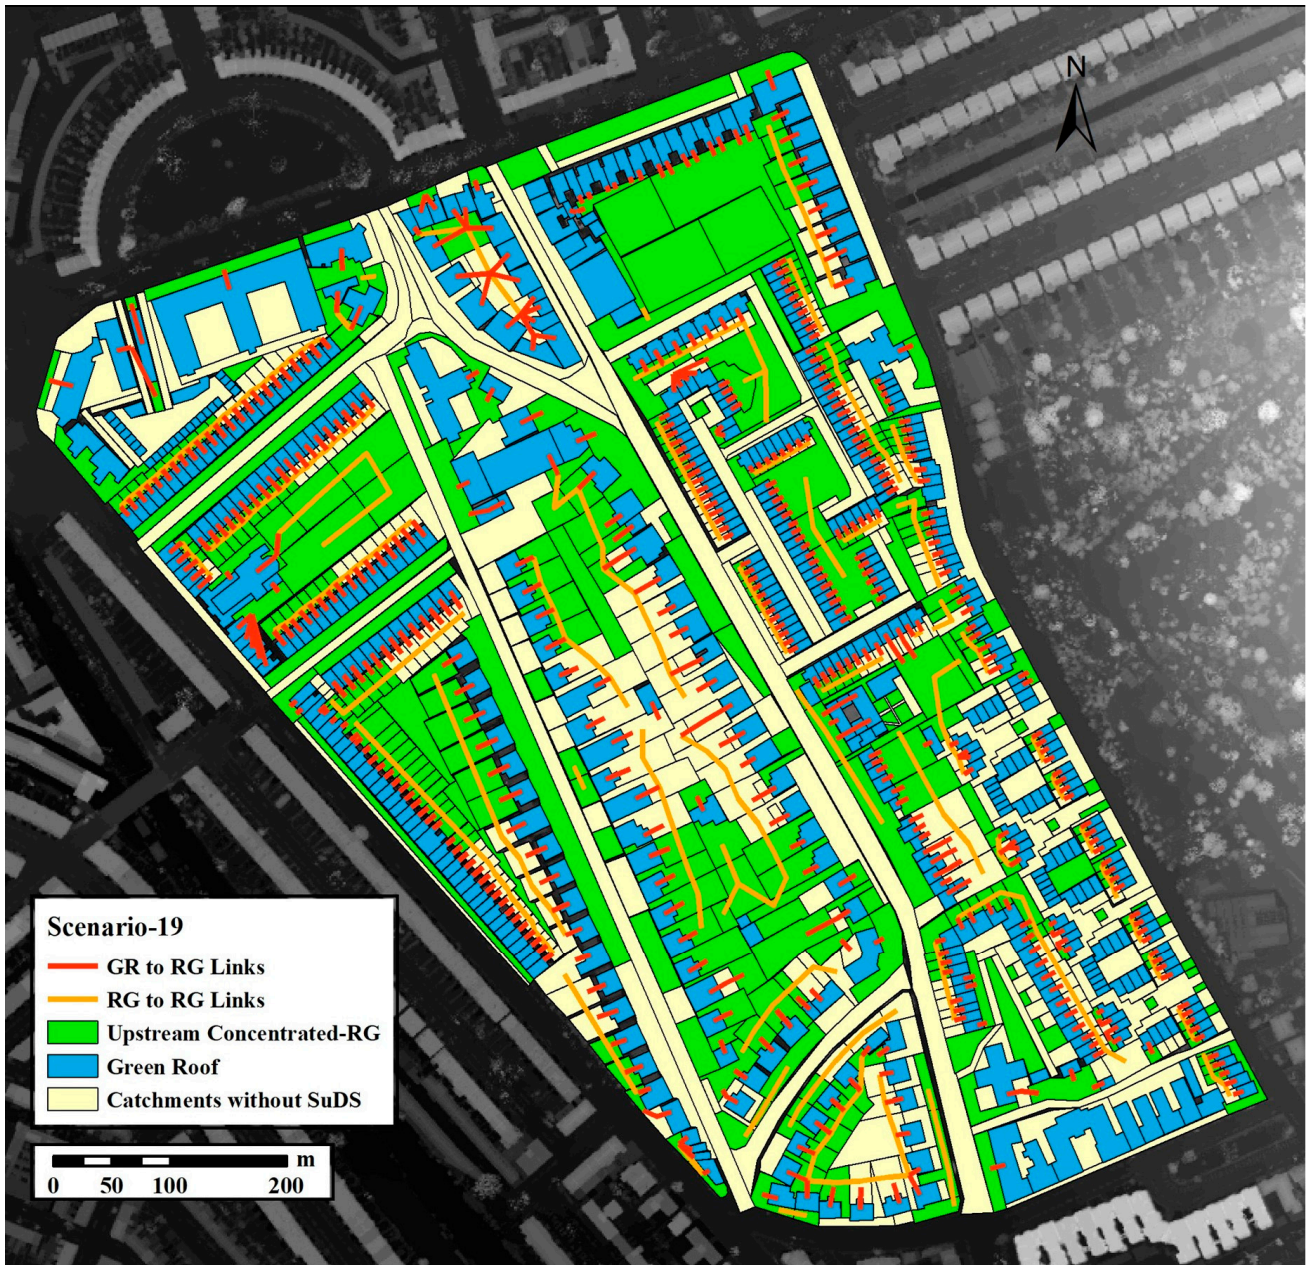

**Fig. S20.** The sketch map of Scenario 19

Scenario 19: One green roof unit is applied to each mini-catchment of buildings; runoff from 526 green roofs is drained to nearby rain gardens; the water in 233 of the adjacent rainwater gardens flows in one direction to the next in turn; one rain garden unit is applied on each upstream mini-catchment of adjacent green land; no clustered SuDS component exists.

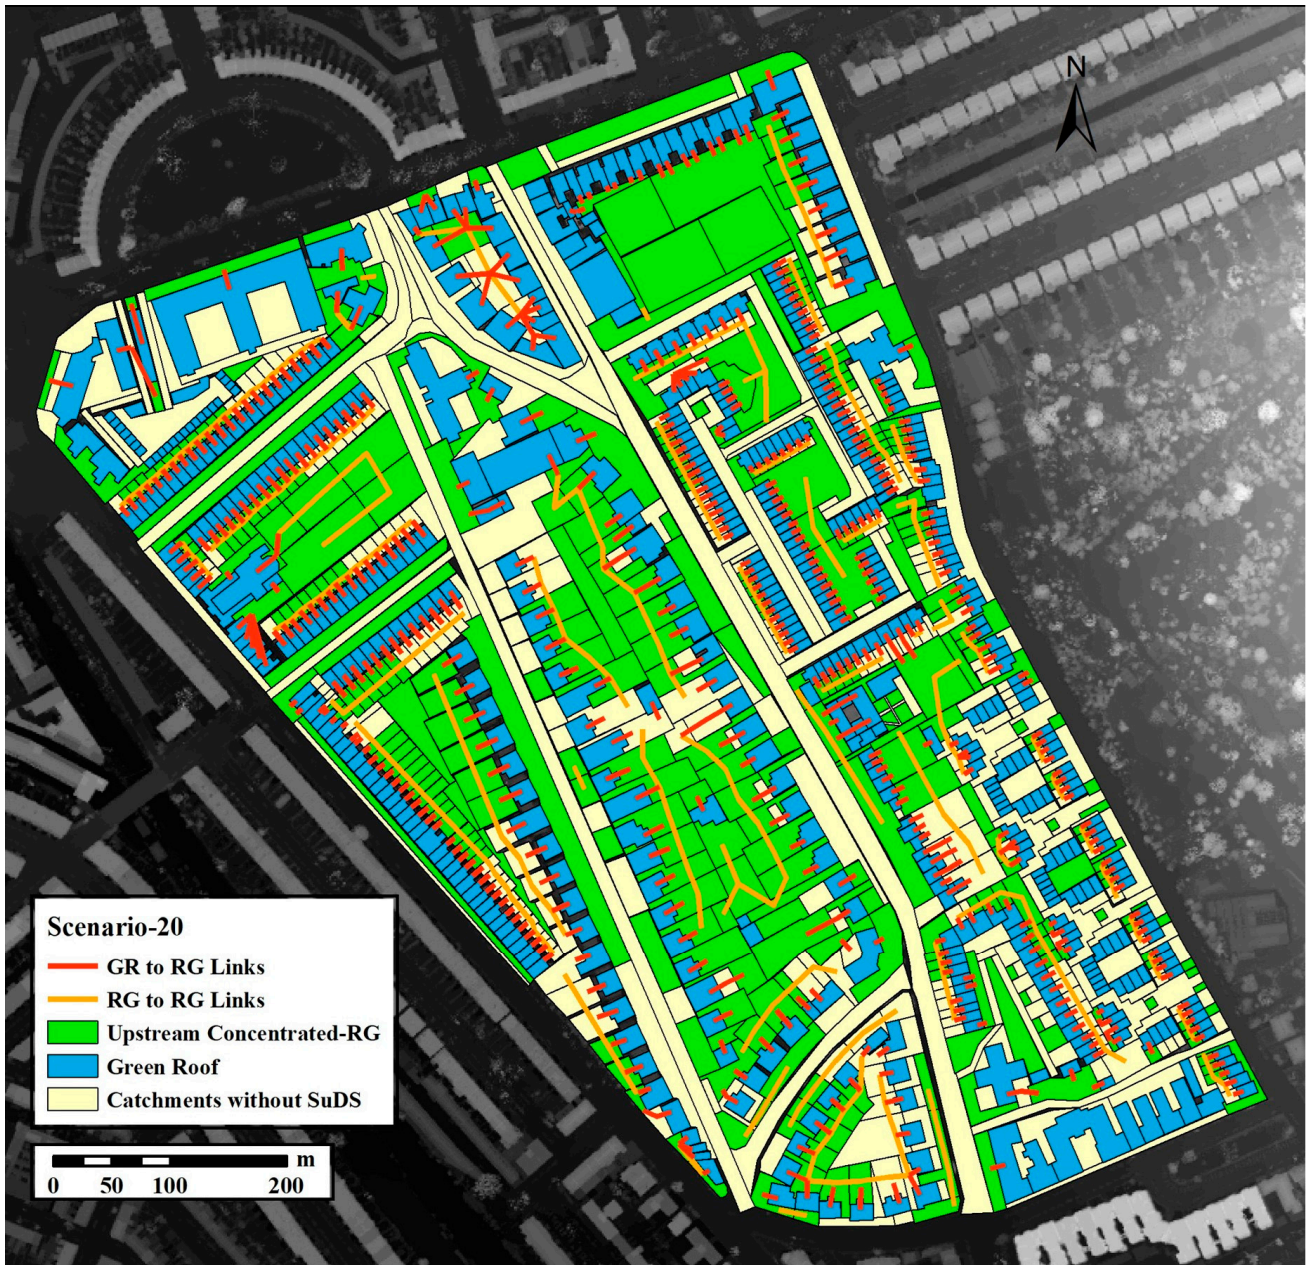

**Fig. S21.** The sketch map of Scenario 20

Scenario 20: One green roof unit is applied to each mini-catchment of buildings; runoff from 526 green roofs is drained to nearby rain gardens; the water in 233 of the adjacent rainwater gardens flows in one direction to the next in turn; one rain garden unit is applied on each upstream mini-catchment of adjacent green land; no clustered SuDS component exists.

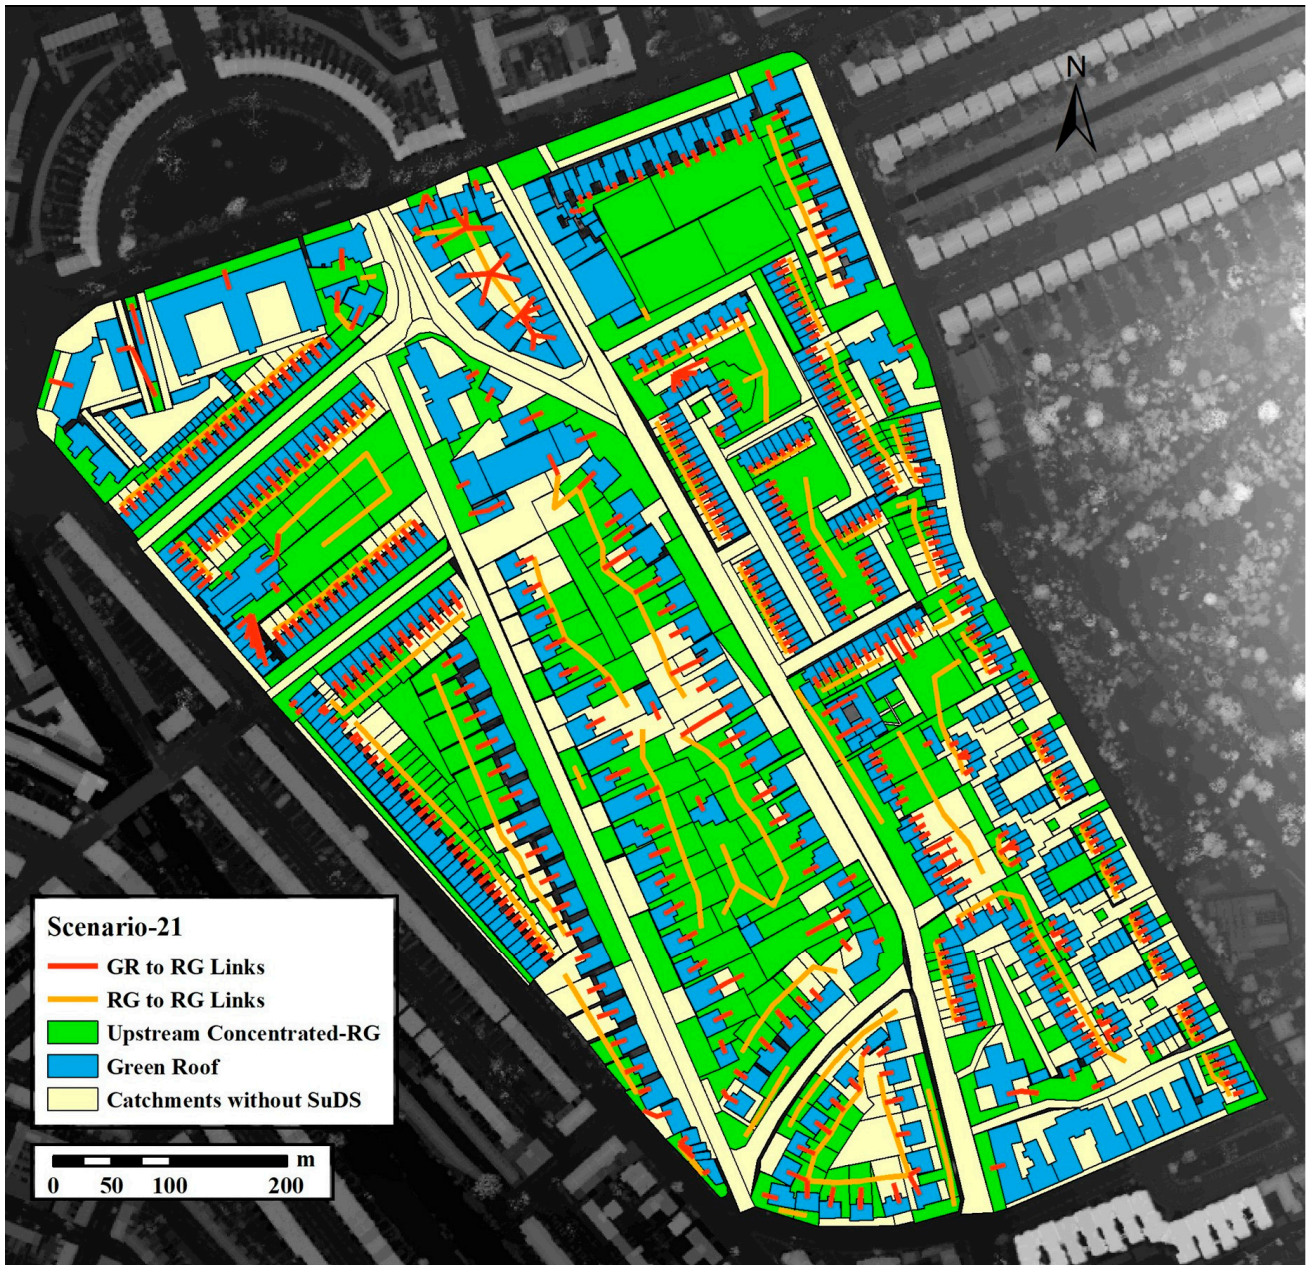

**Fig. S22.** The sketch map of Scenario 21

Scenario 21: One green roof unit is applied to each mini-catchment of buildings; runoff from 526 green roofs is drained to nearby rain gardens; the water in 233 of the adjacent rainwater gardens flows in one direction to the next in turn; one rain garden unit is applied on each upstream mini-catchment of adjacent green land; no clustered SuDS component exists.

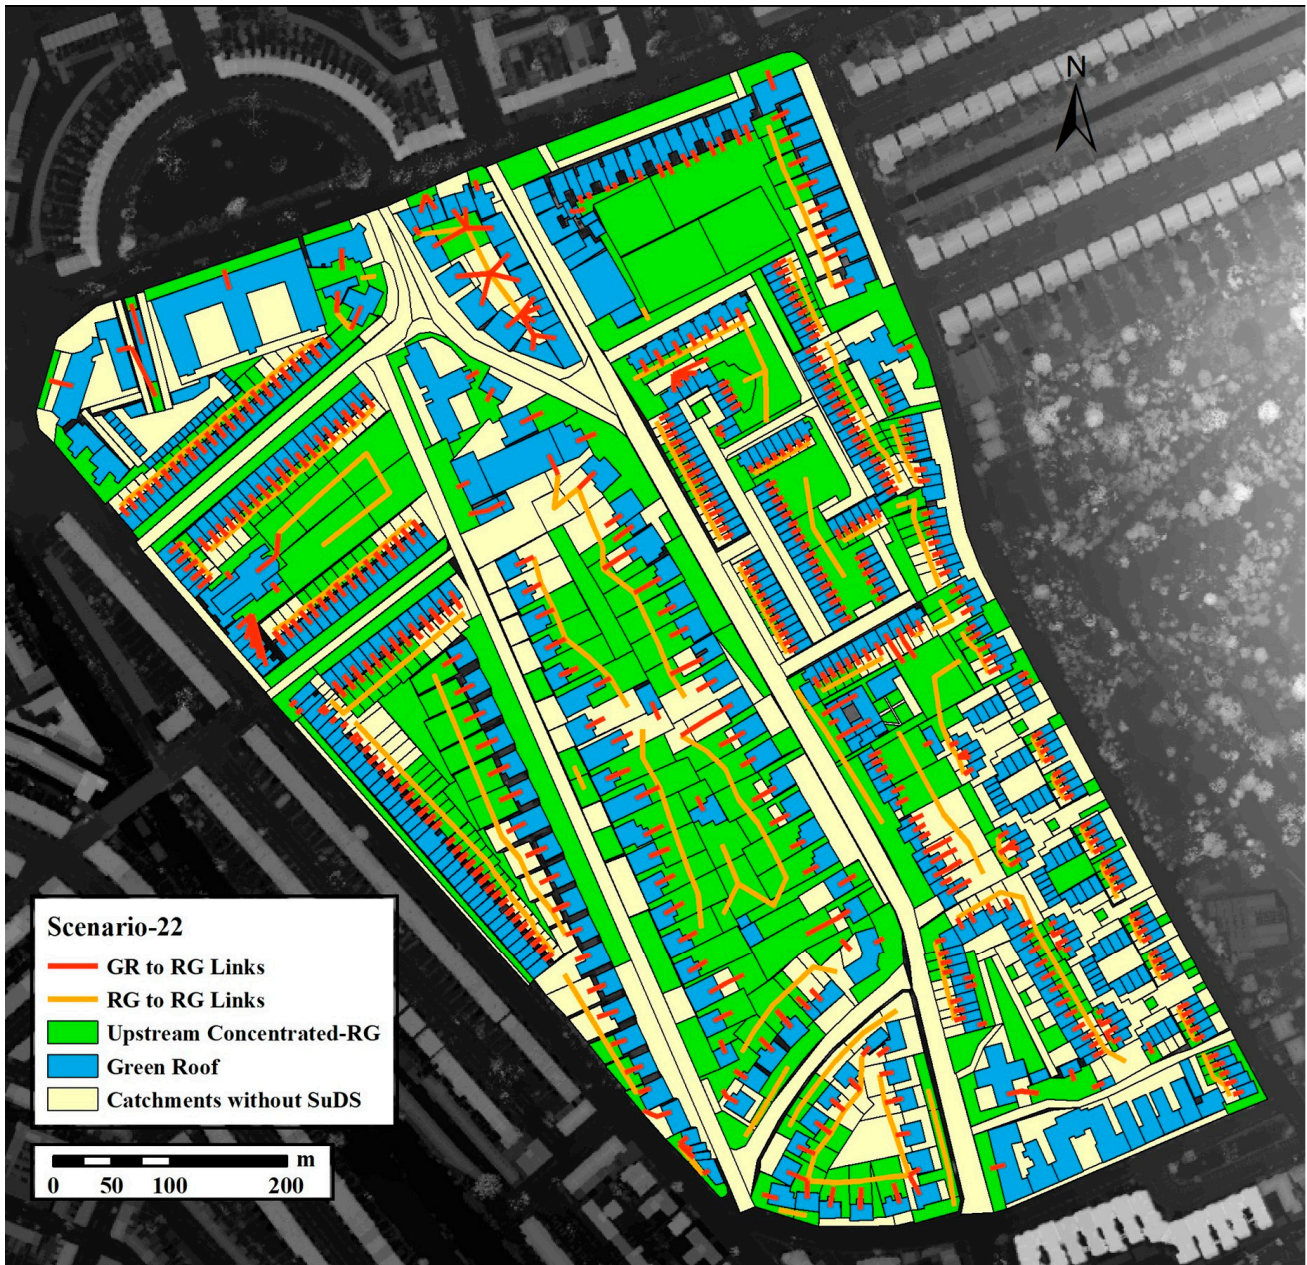

**Fig. S23.** The sketch map of Scenario 22

Scenario 22: One green roof unit is applied to each mini-catchment of buildings; runoff from 526 green roofs is drained to nearby rain gardens; the water in 233 of the adjacent rainwater gardens flows in one direction to the next in turn; one rain garden unit is applied on each upstream mini-catchment of adjacent green land; no clustered SuDS component exists.

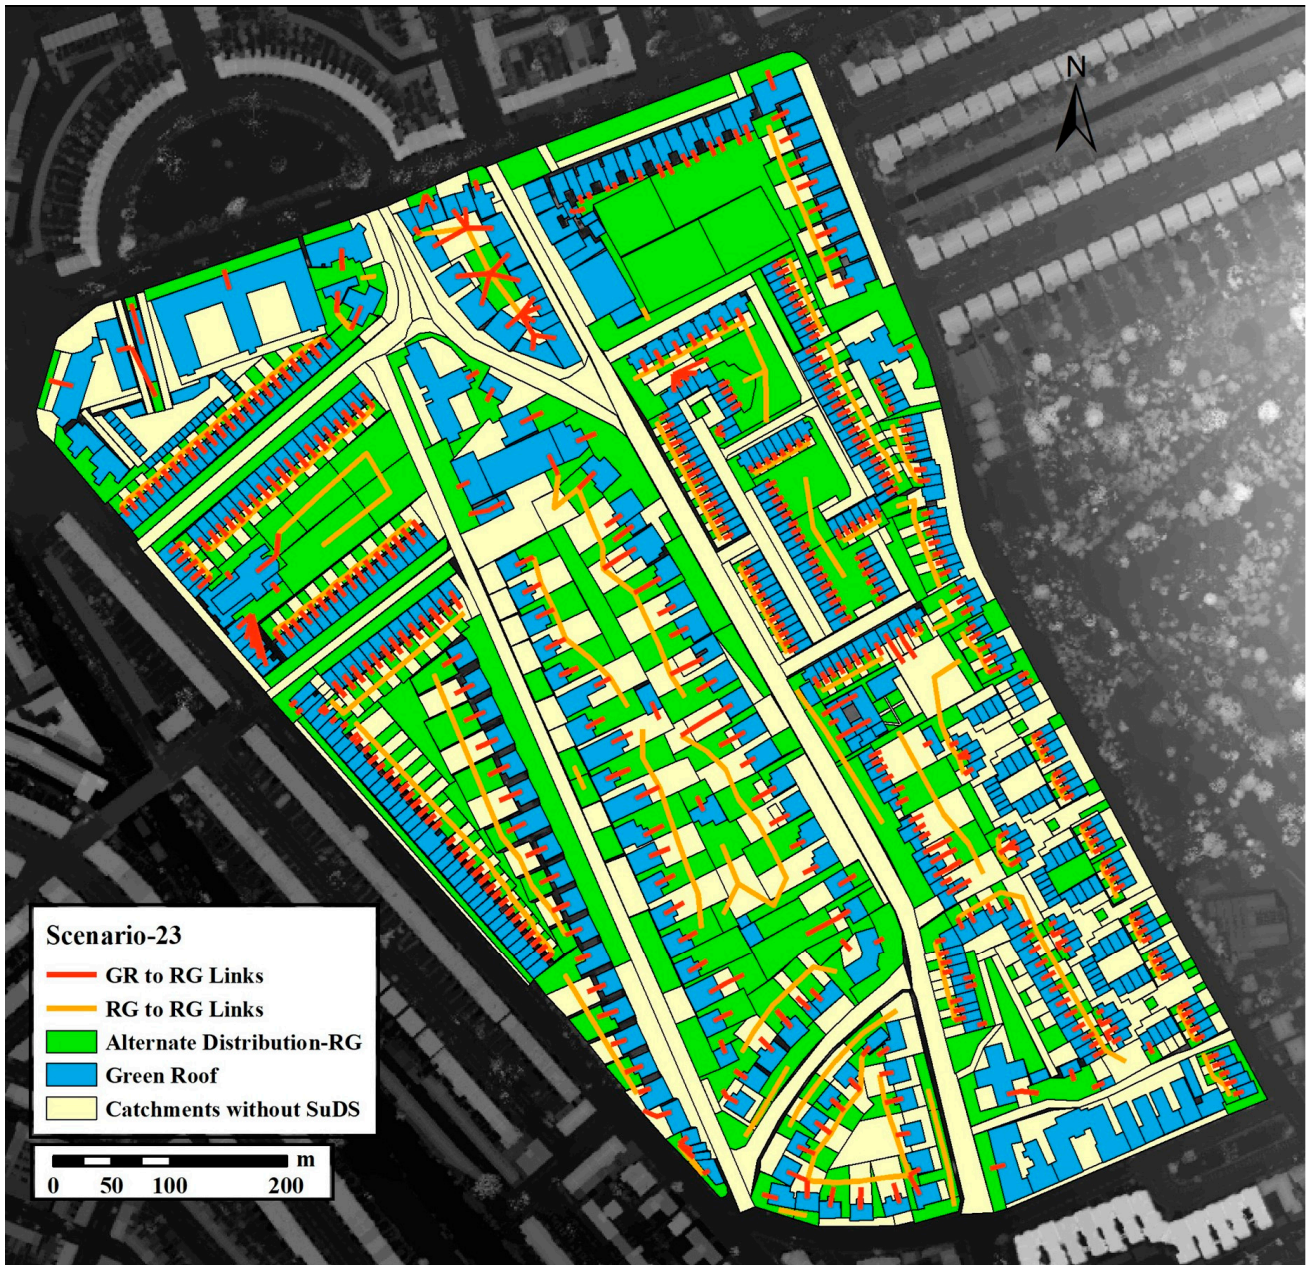

**Fig. S24.** The sketch map of Scenario 23

Scenario 23: One green roof unit is applied to each mini-catchment of buildings; the runoff from 526 green roofs is drained to nearby rain gardens; the water in 233 of the adjacent rainwater gardens flows in one direction to the next in turn; one rain garden unit is applied on each even-numbered mini-catchment of adjacent green land; no clustered SuDS component exists.

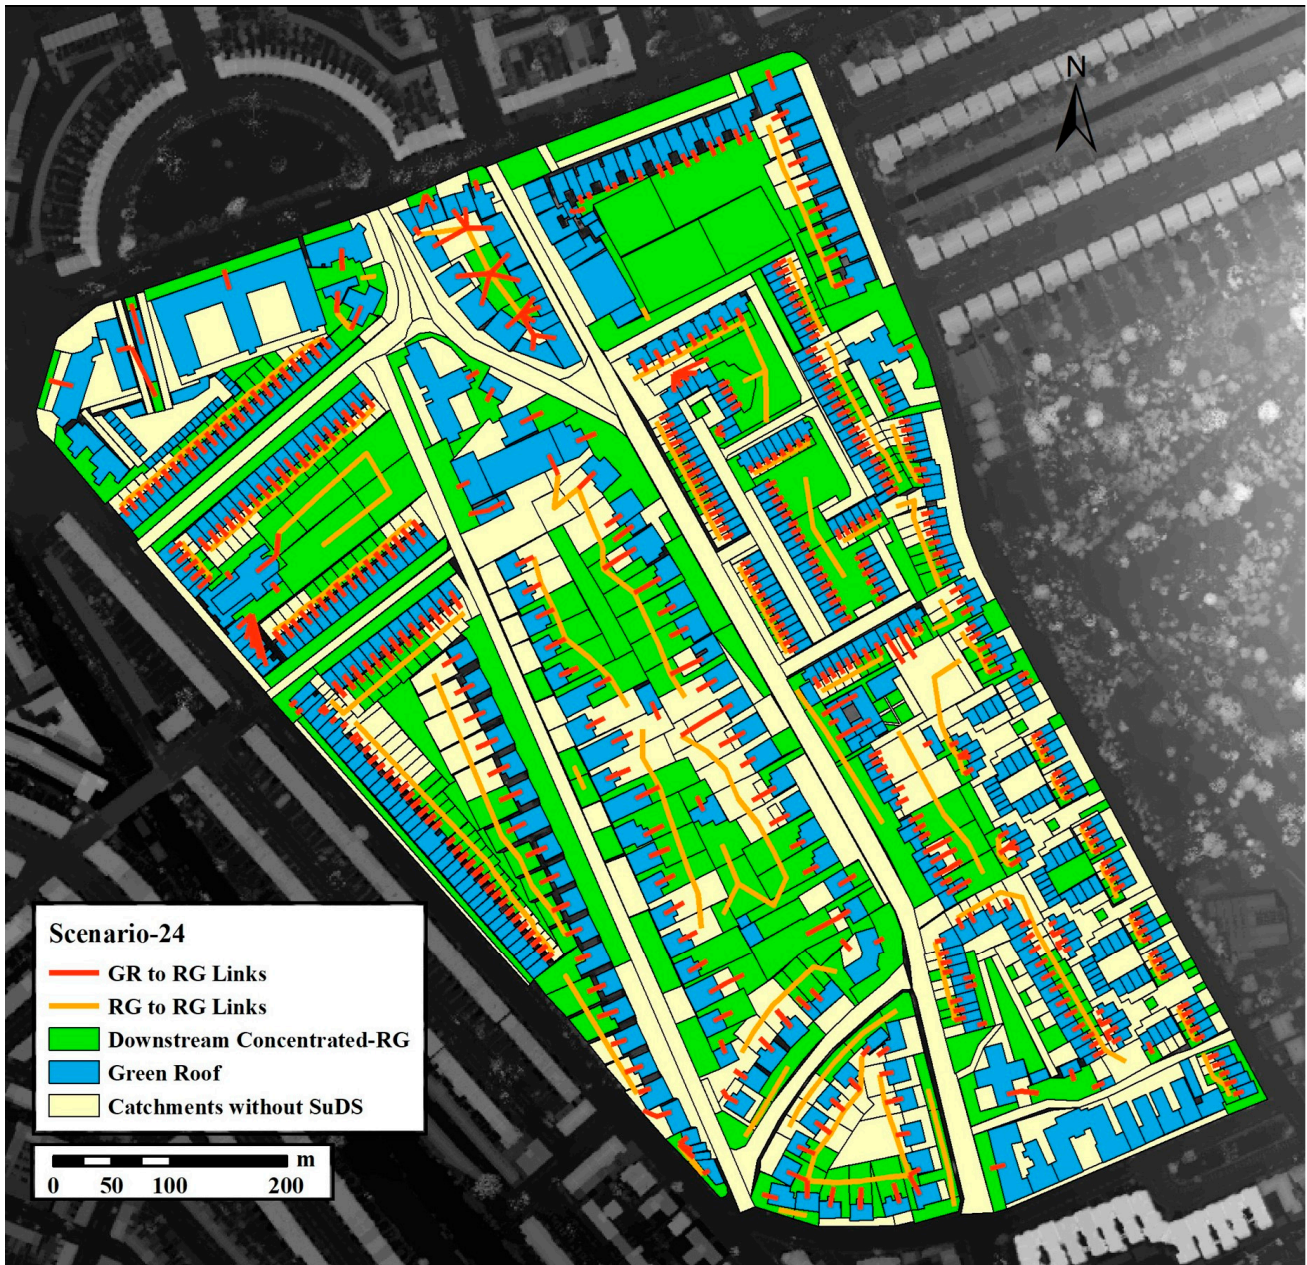

**Fig. S25.** The sketch map of Scenario 24

Scenario 24: One green roof unit is applied to each mini-catchment of buildings; the runoff from 526 green roofs is drained to nearby rain gardens; the water in 233 of the adjacent rainwater gardens flows in one direction to the next in turn; one rain garden unit is applied on each downstream mini-catchment of adjacent green land; no clustered SuDS component exists.

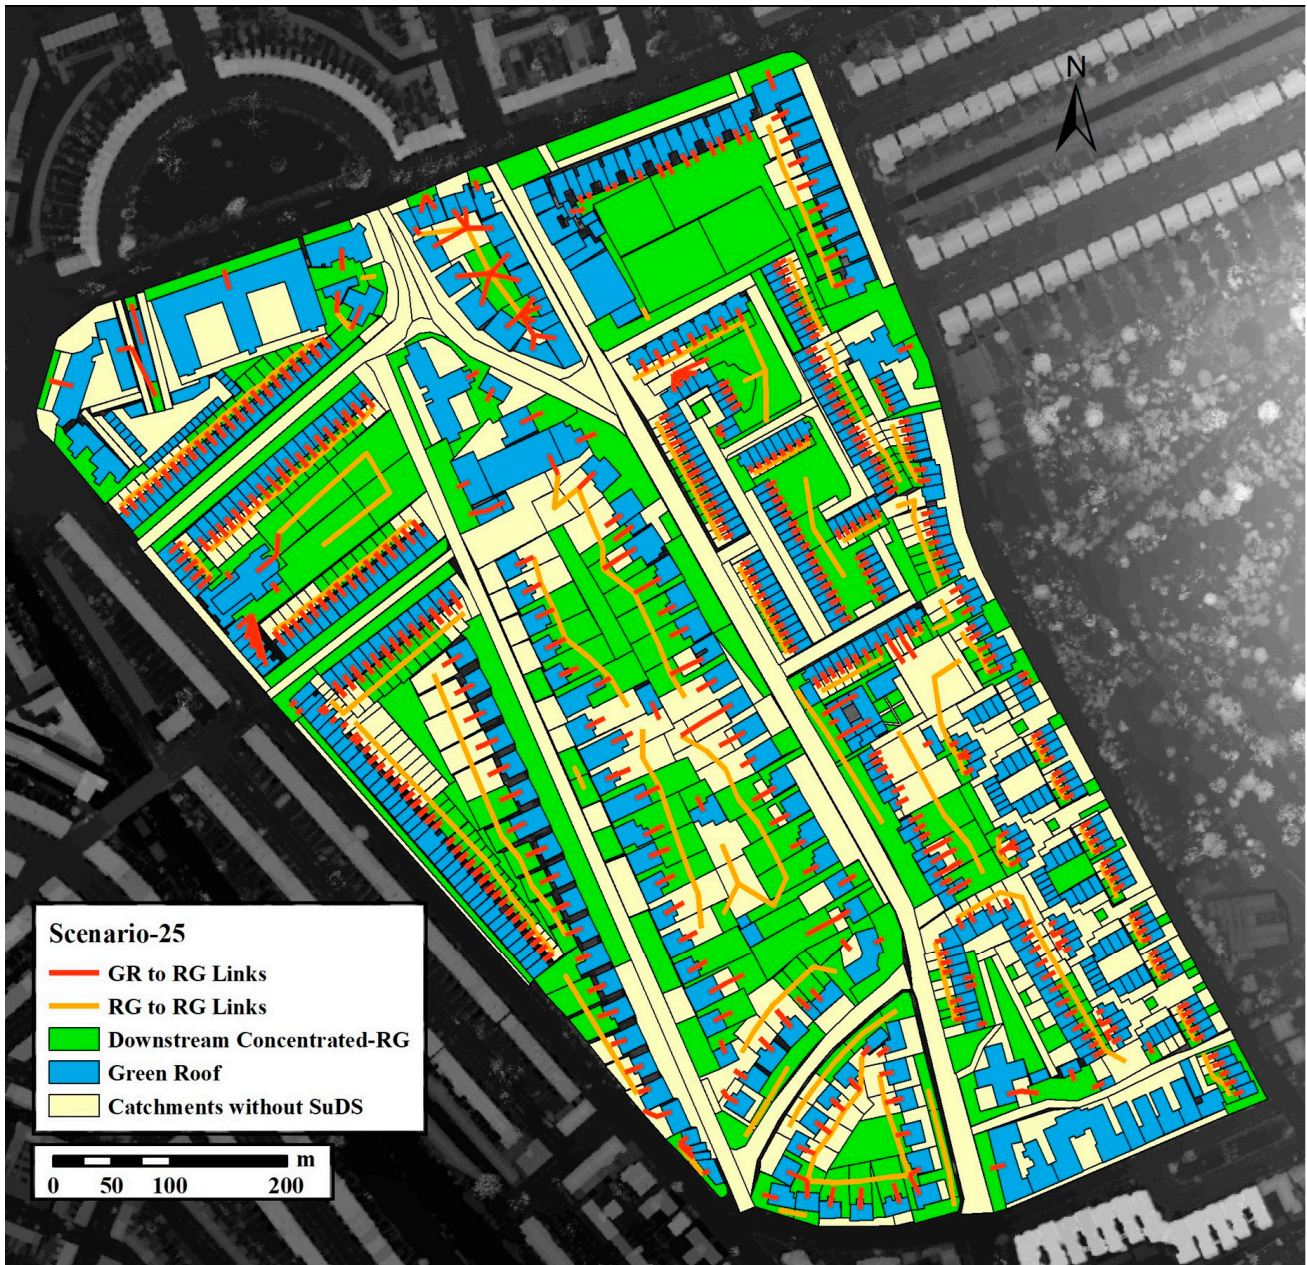

**Fig. S26.** The sketch map of Scenario 25

Scenario 25: One green roof unit is applied to each mini-catchment of buildings; the runoff from 526 green roofs is drained to nearby rain gardens; the water in 233 of the adjacent rainwater gardens flows in one direction to the next in turn; one rain garden unit is applied on each downstream mini-catchment of adjacent green land; no clustered SuDS component exists.

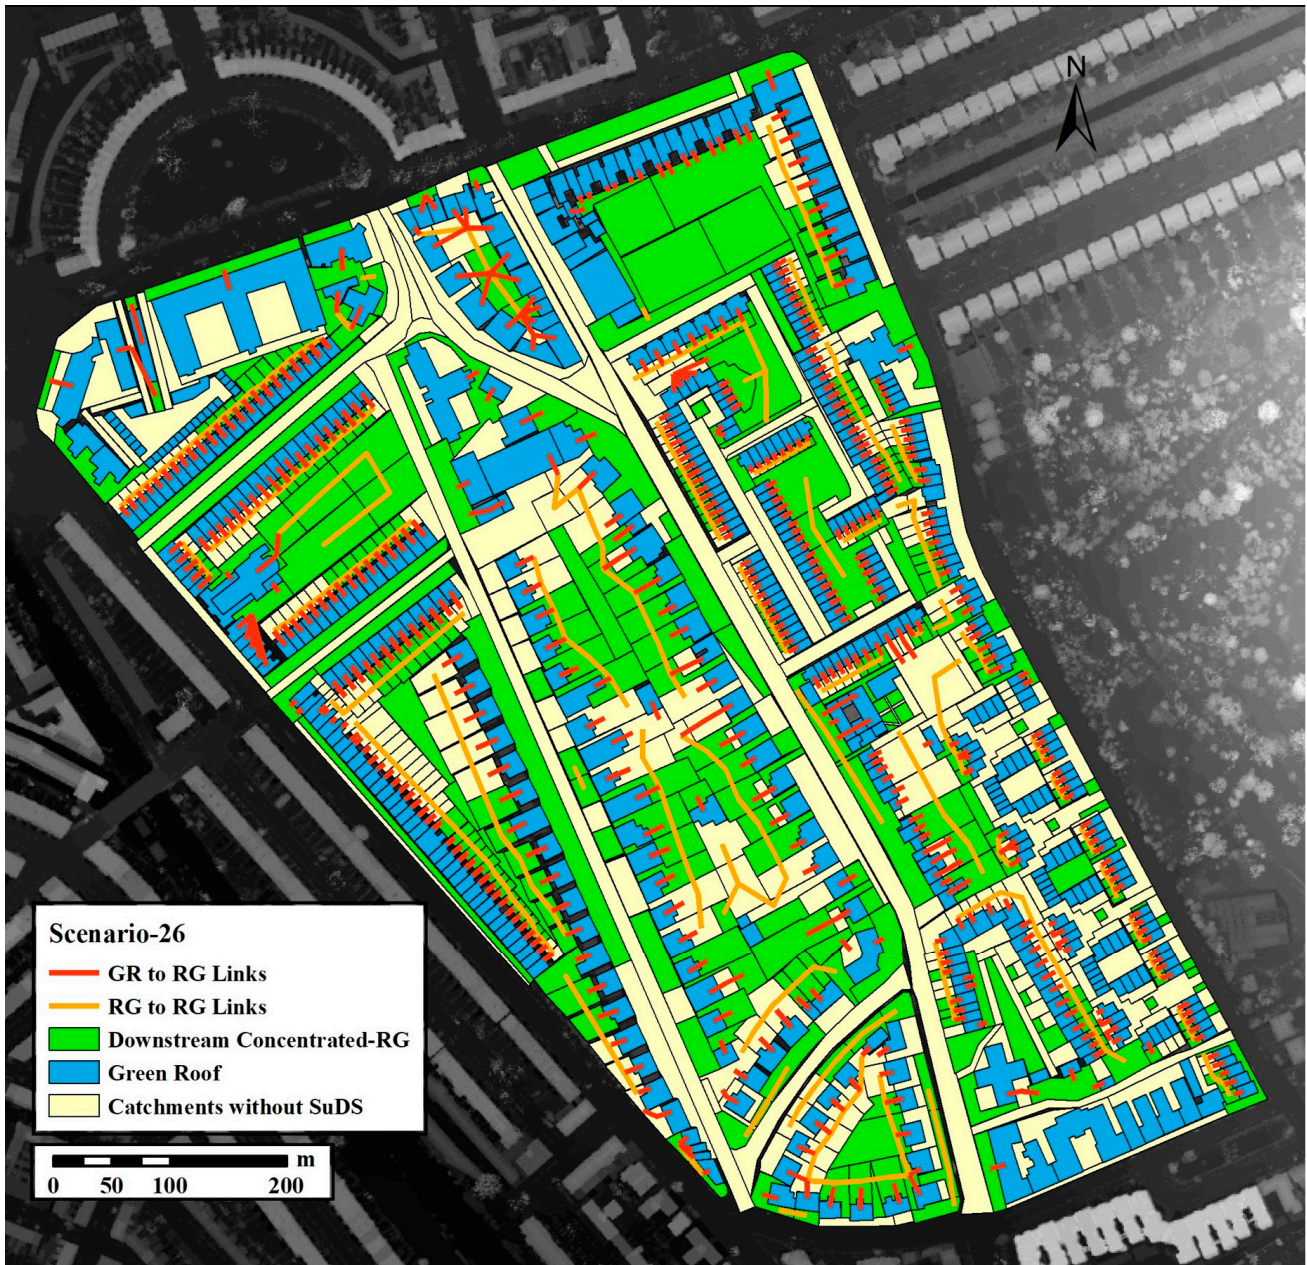

**Fig. S27.** The sketch map of Scenario 26

Scenario 26: One green roof unit is applied to each mini-catchment of buildings; the runoff from 526 green roofs is drained to nearby rain gardens; the water in 233 of the adjacent rainwater gardens flows in one direction to the next in turn; one rain garden unit is applied on each downstream mini-catchment of adjacent green land; no clustered SuDS component exists.

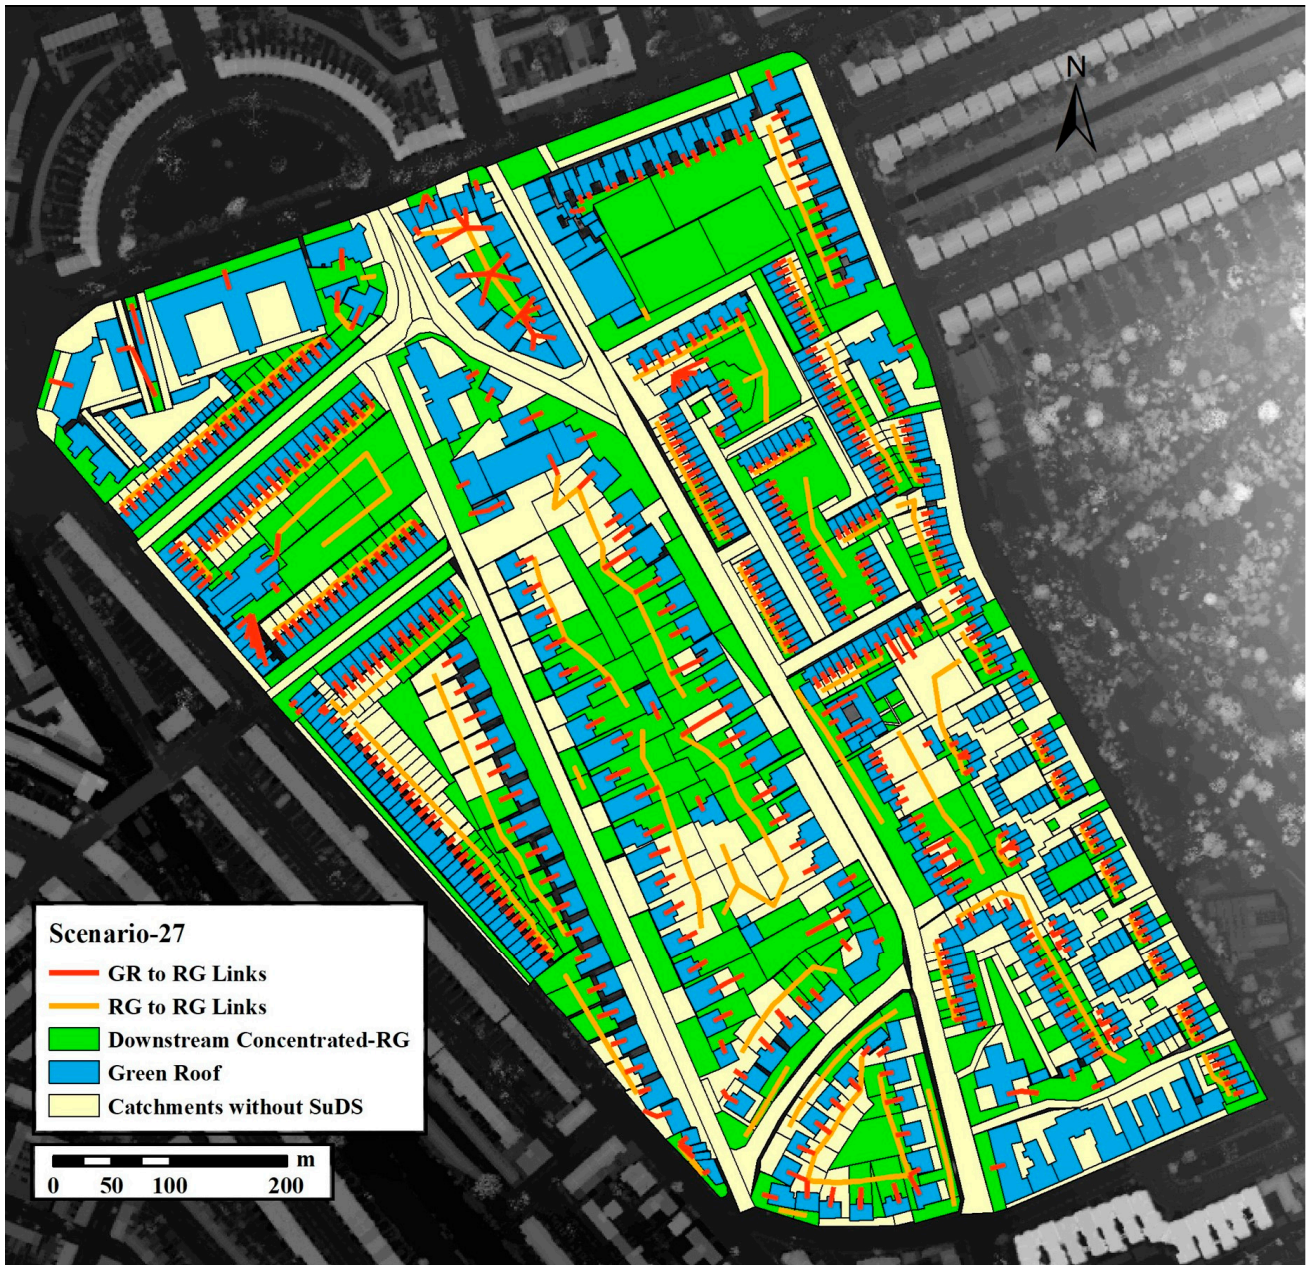

**Fig. S28.** The sketch map of Scenario 27

Scenario 27: One green roof unit is applied to each mini-catchment of buildings; the runoff from 526 green roofs is drained to nearby rain gardens; the water in 233 of the adjacent rainwater gardens flows in one direction to the next in turn; one rain garden unit is applied on each downstream mini-catchment of adjacent green land; no clustered SuDS component exists.

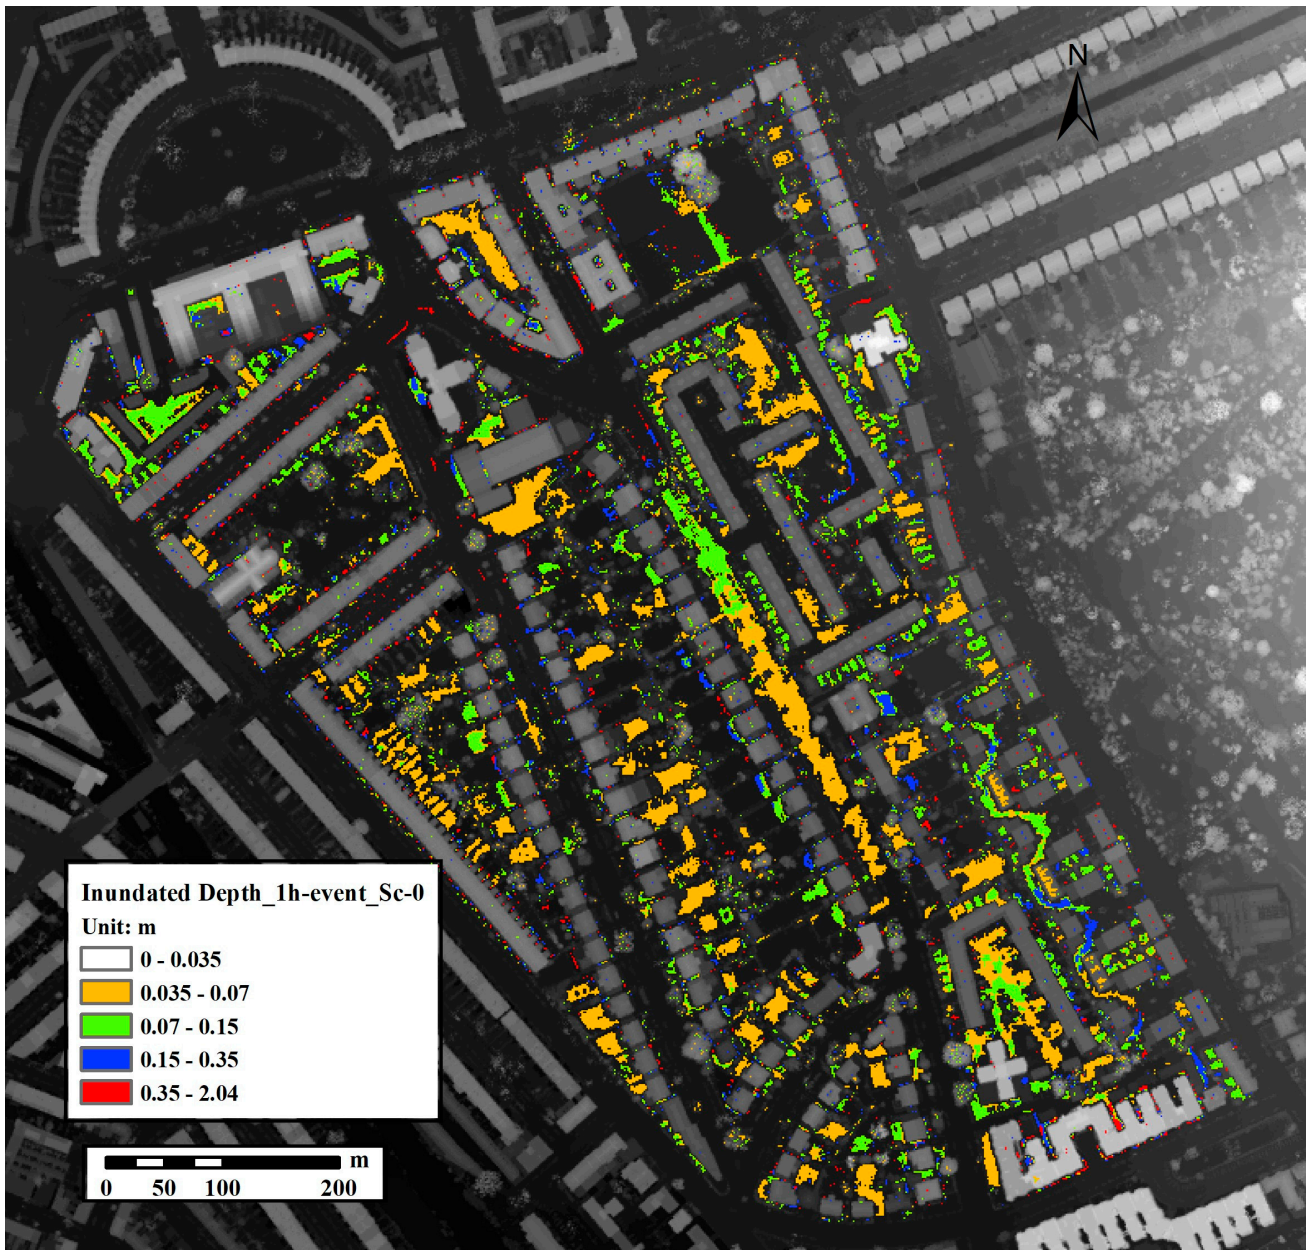

Fig. S29. Flood map of scenario 0 at the time of 2h (1-hour rainfall event)

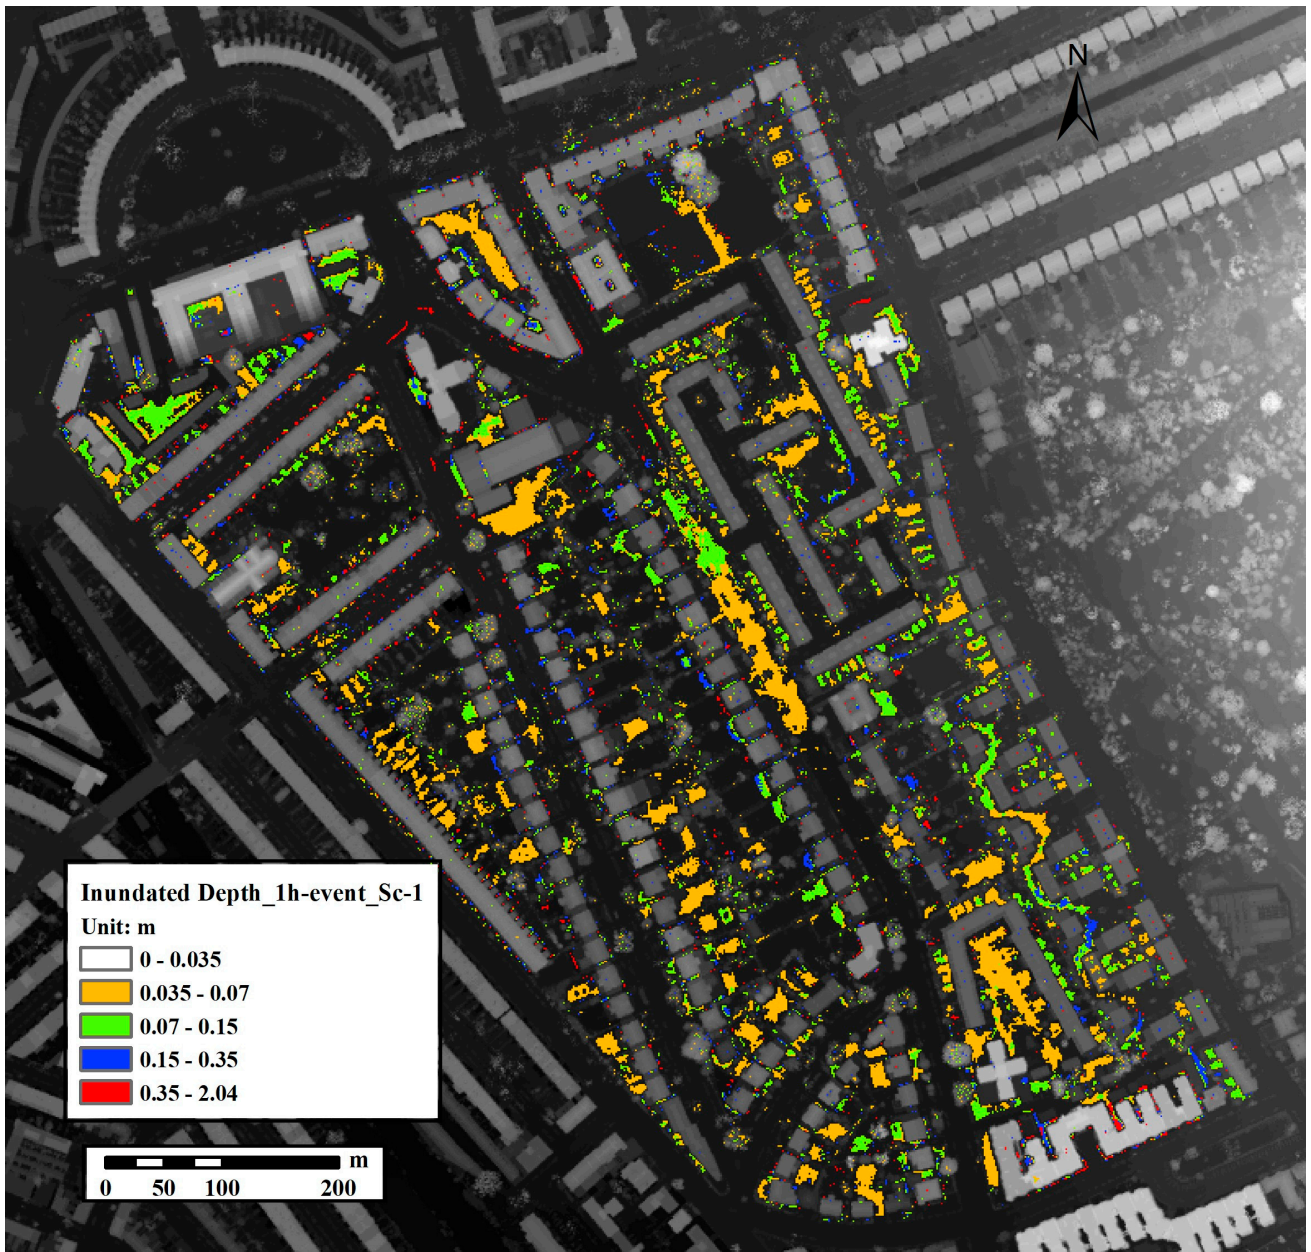

Fig. S30. Flood map of scenario 1 at the time of 2h (1-hour rainfall event)

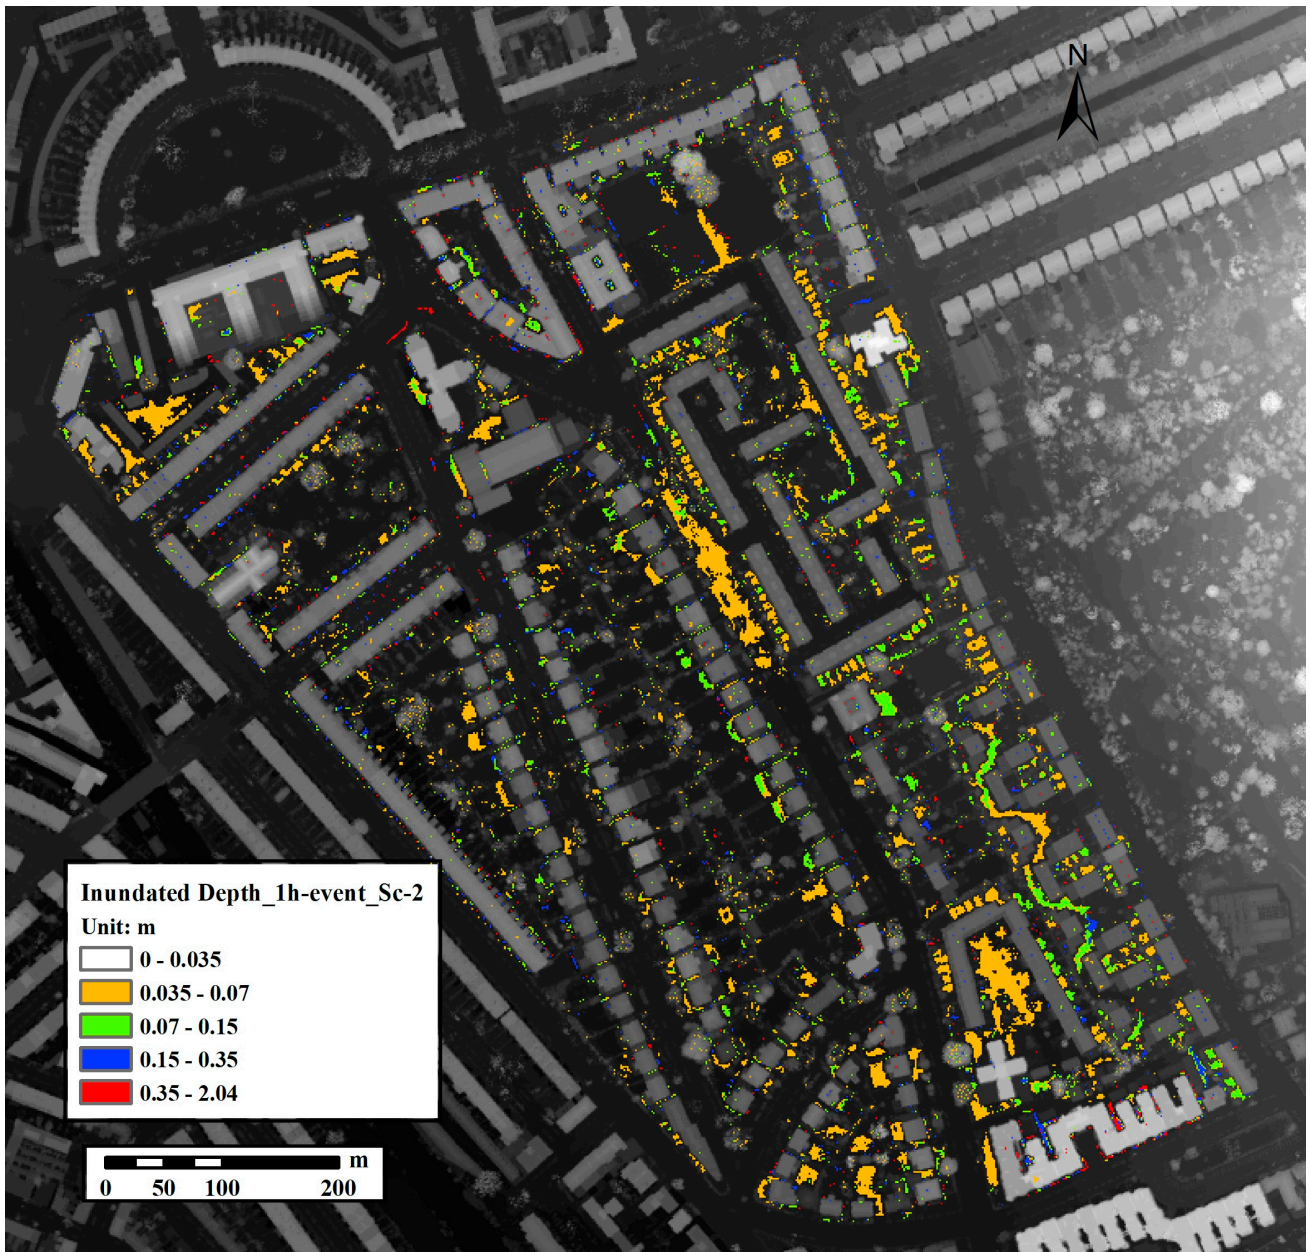

Fig. S31. Flood map of scenario 2 at the time of 2h (1-hour rainfall event)

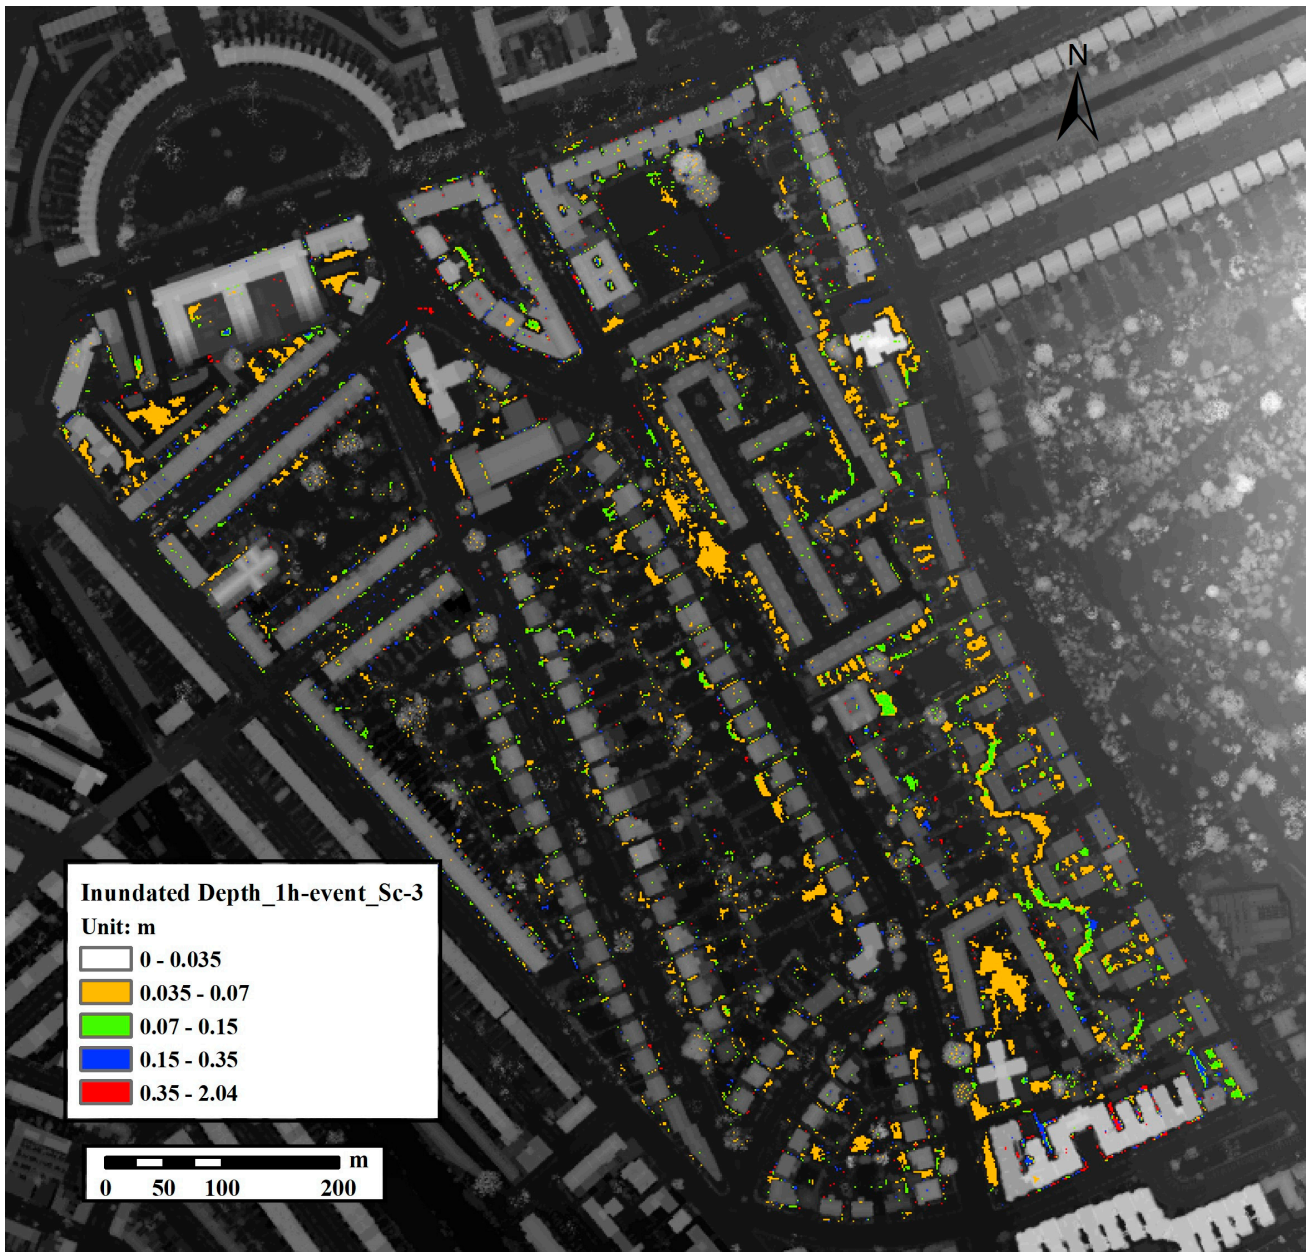

Fig. S32. Flood map of scenario 3 at the time of 2h (1-hour rainfall event)

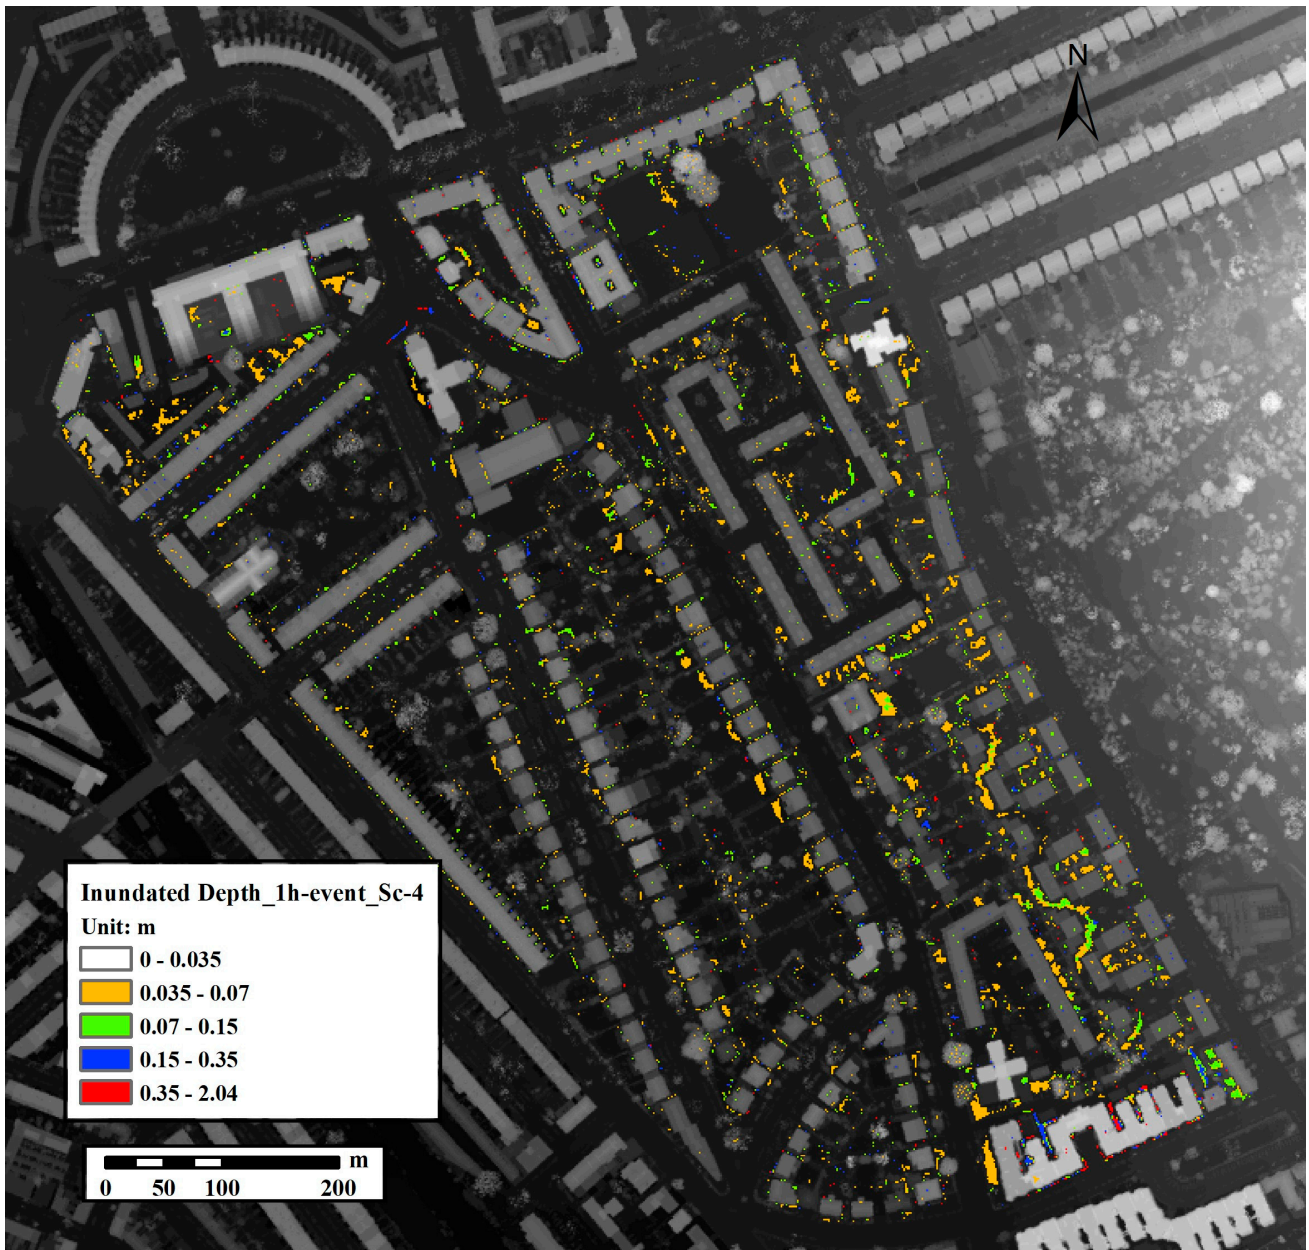

Fig. S33. Flood map of scenario 4 at the time of 2h (1-hour rainfall event)

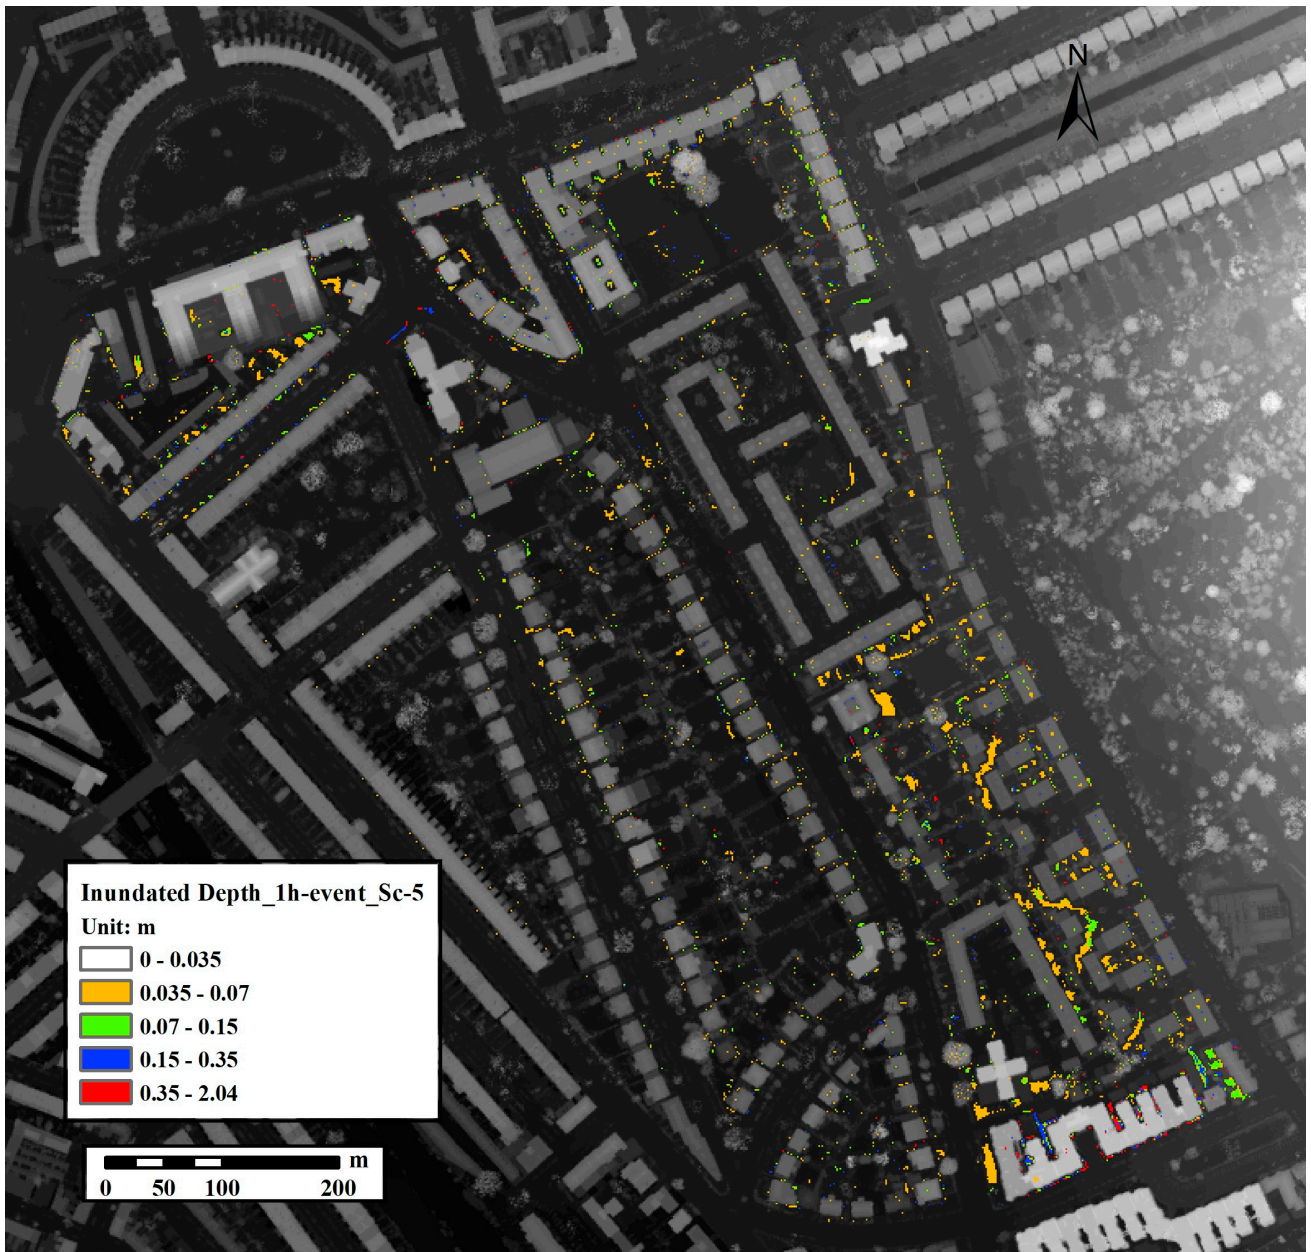

Fig. S34. Flood map of scenario 5 at the time of 2h (1-hour rainfall event)

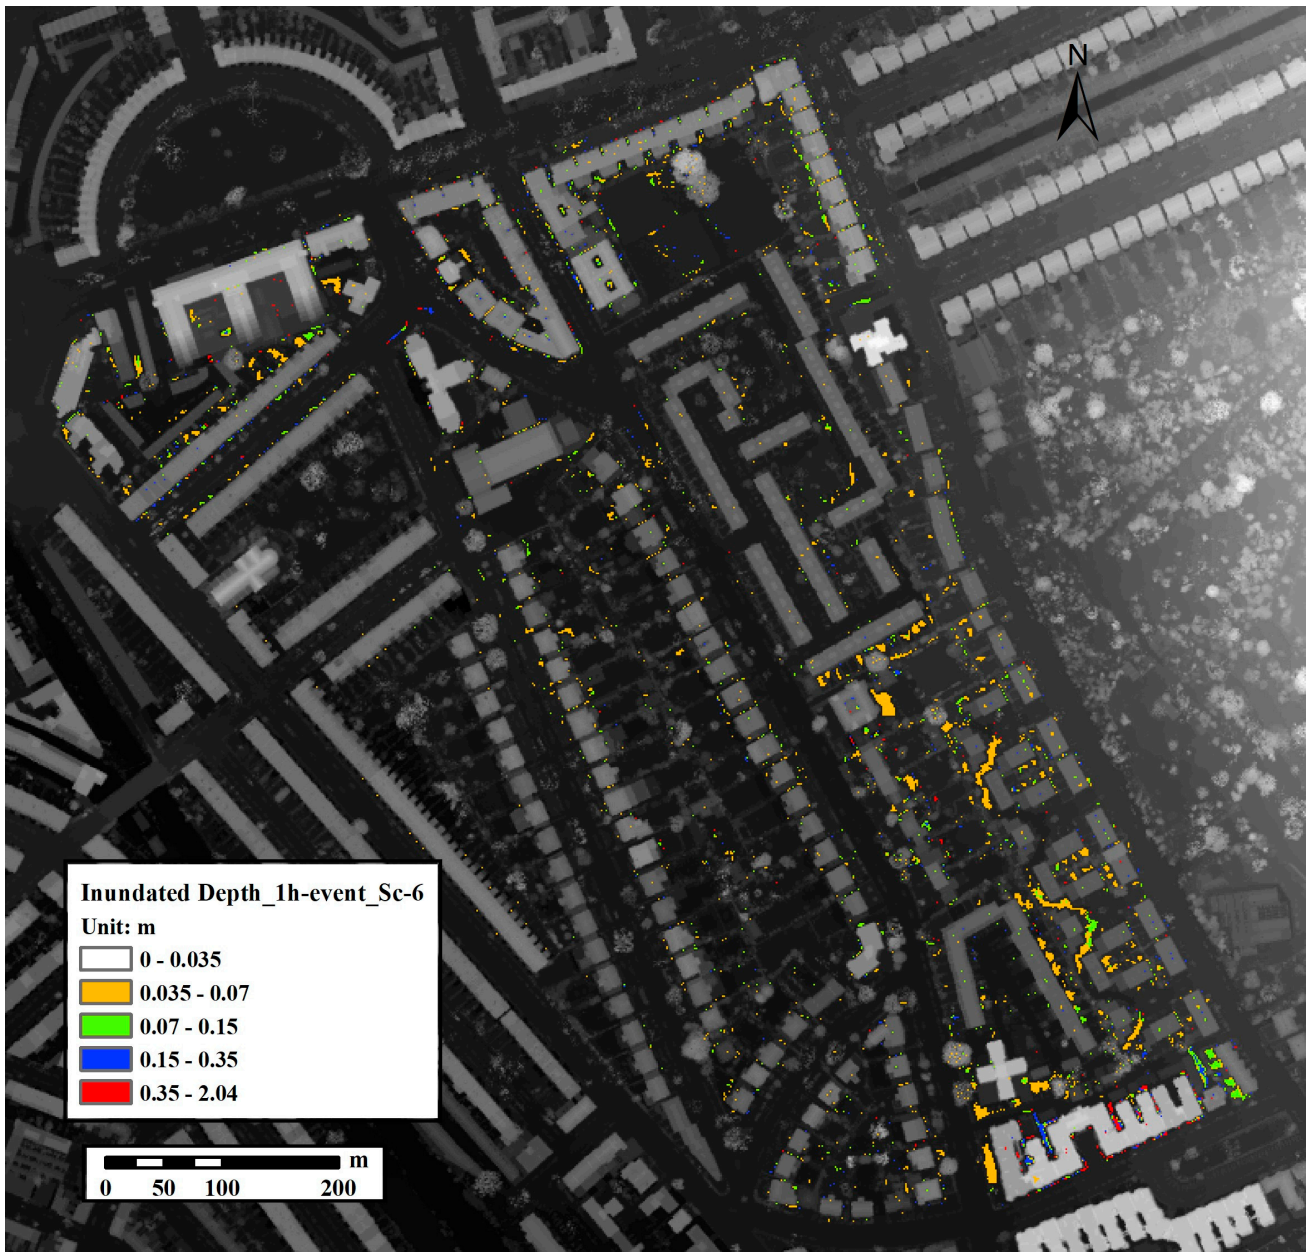

Fig. S35. Flood map of scenario 6 at the time of 2h (1-hour rainfall event)

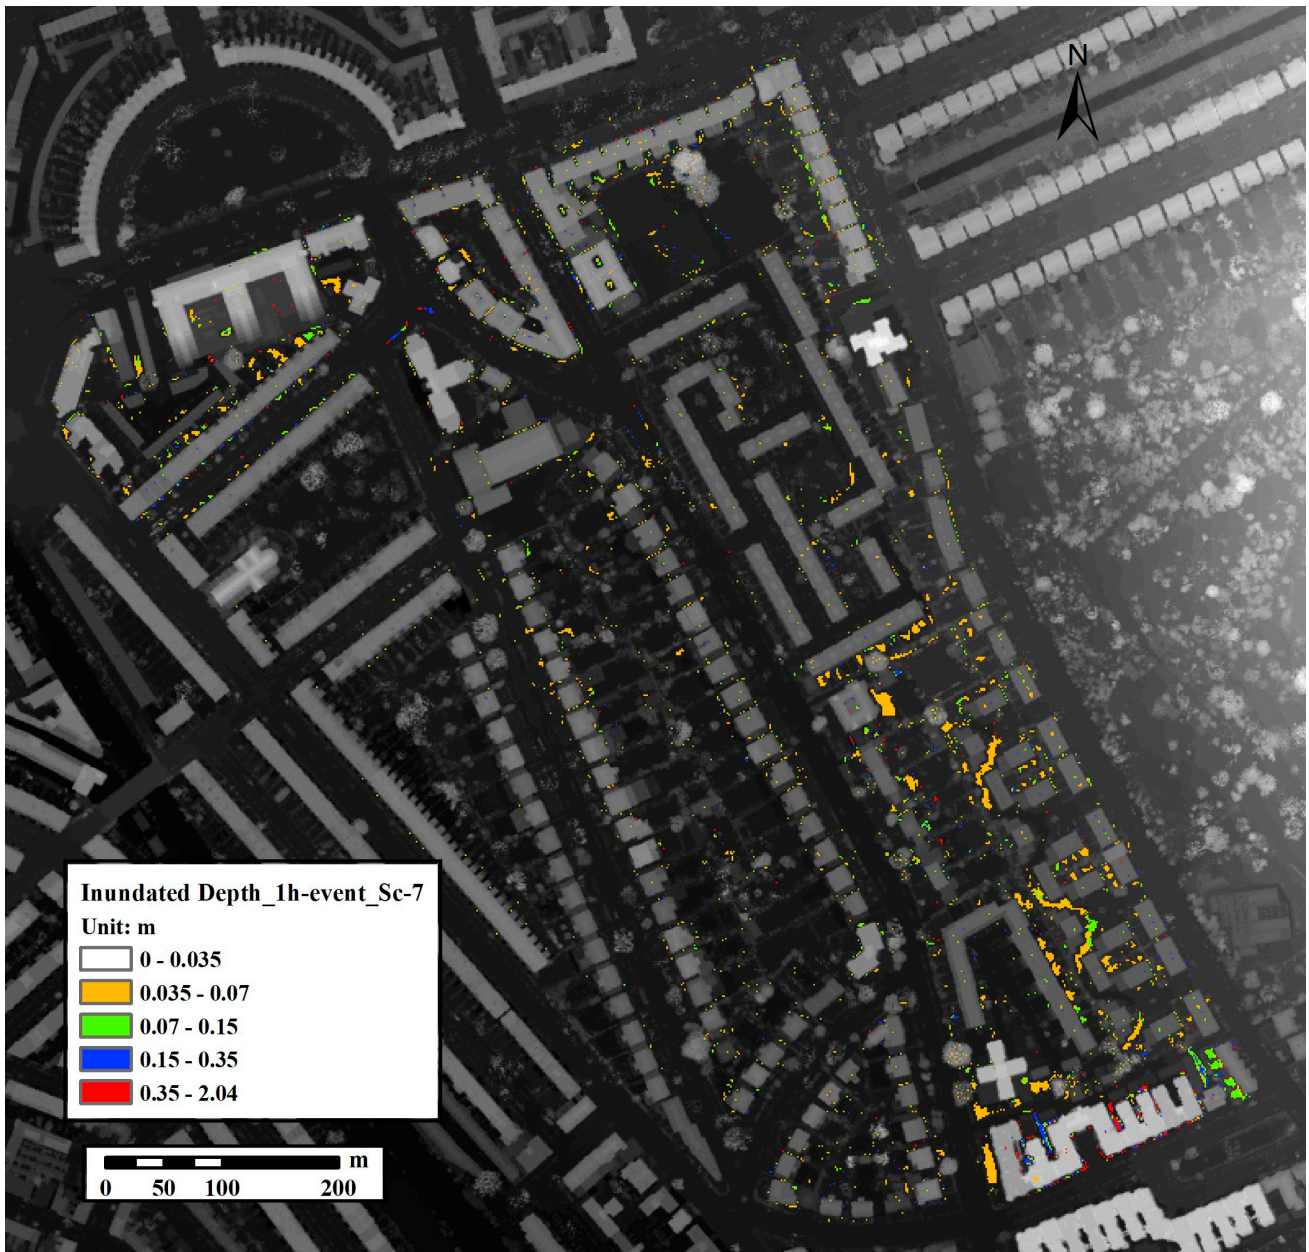

Fig. S36. Flood map of scenario 7 at the time of 2h (1-hour rainfall event)

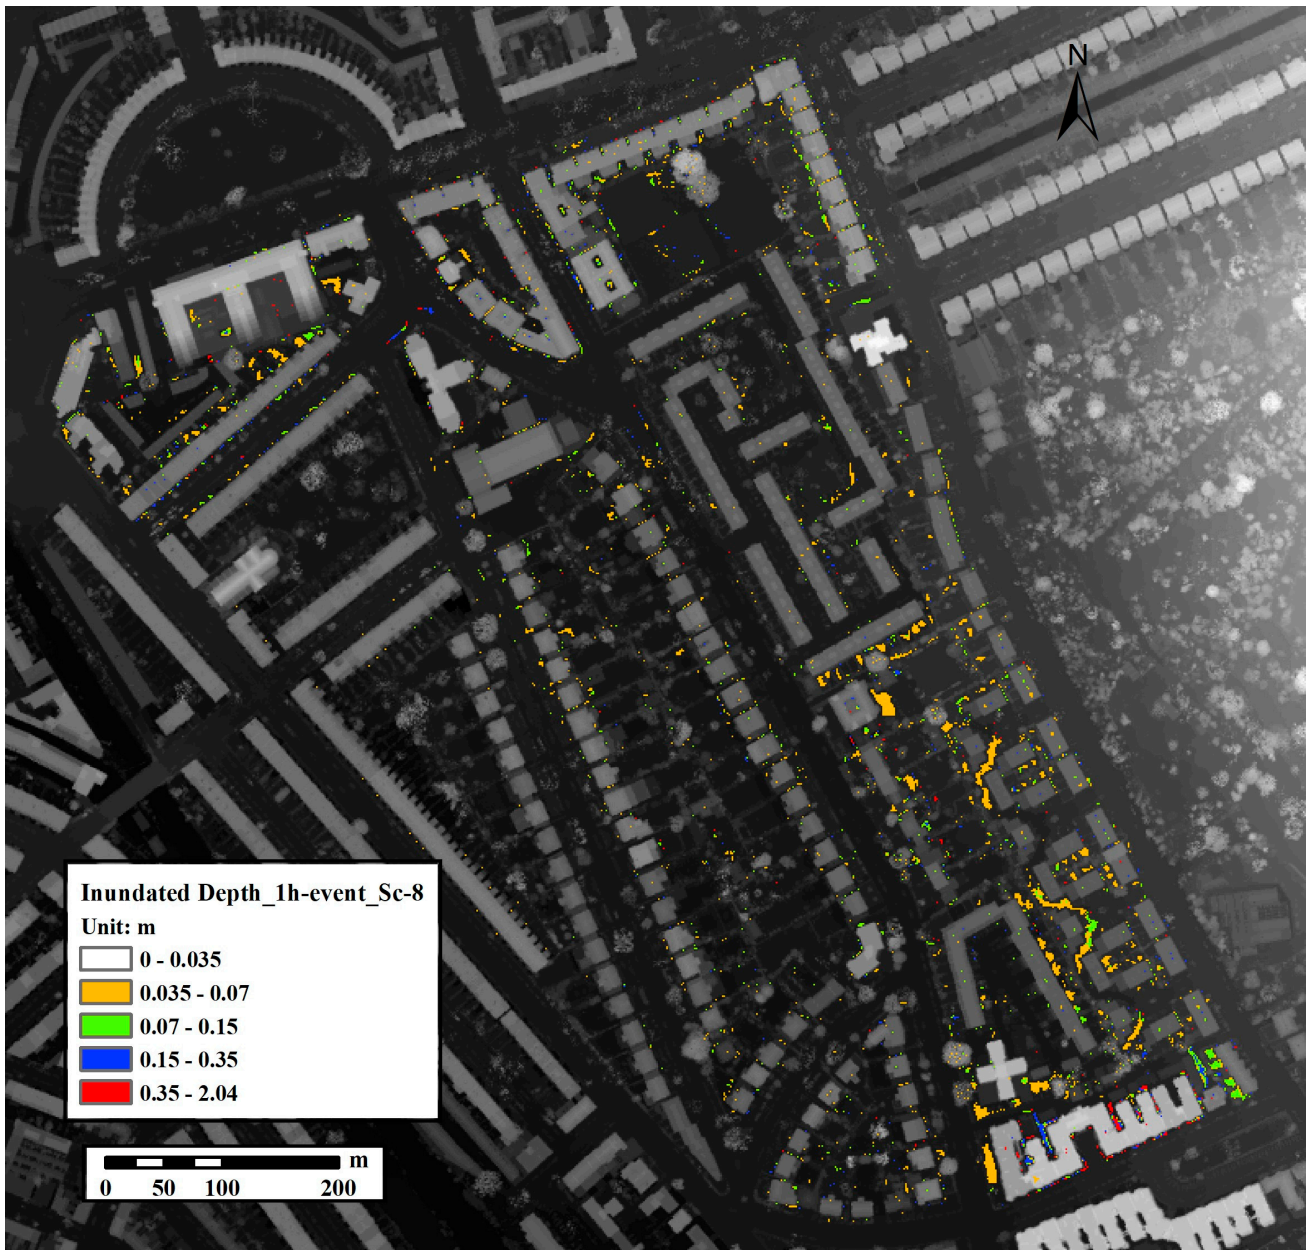

Fig. S37. Flood map of scenario 8 at the time of 2h (1-hour rainfall event)

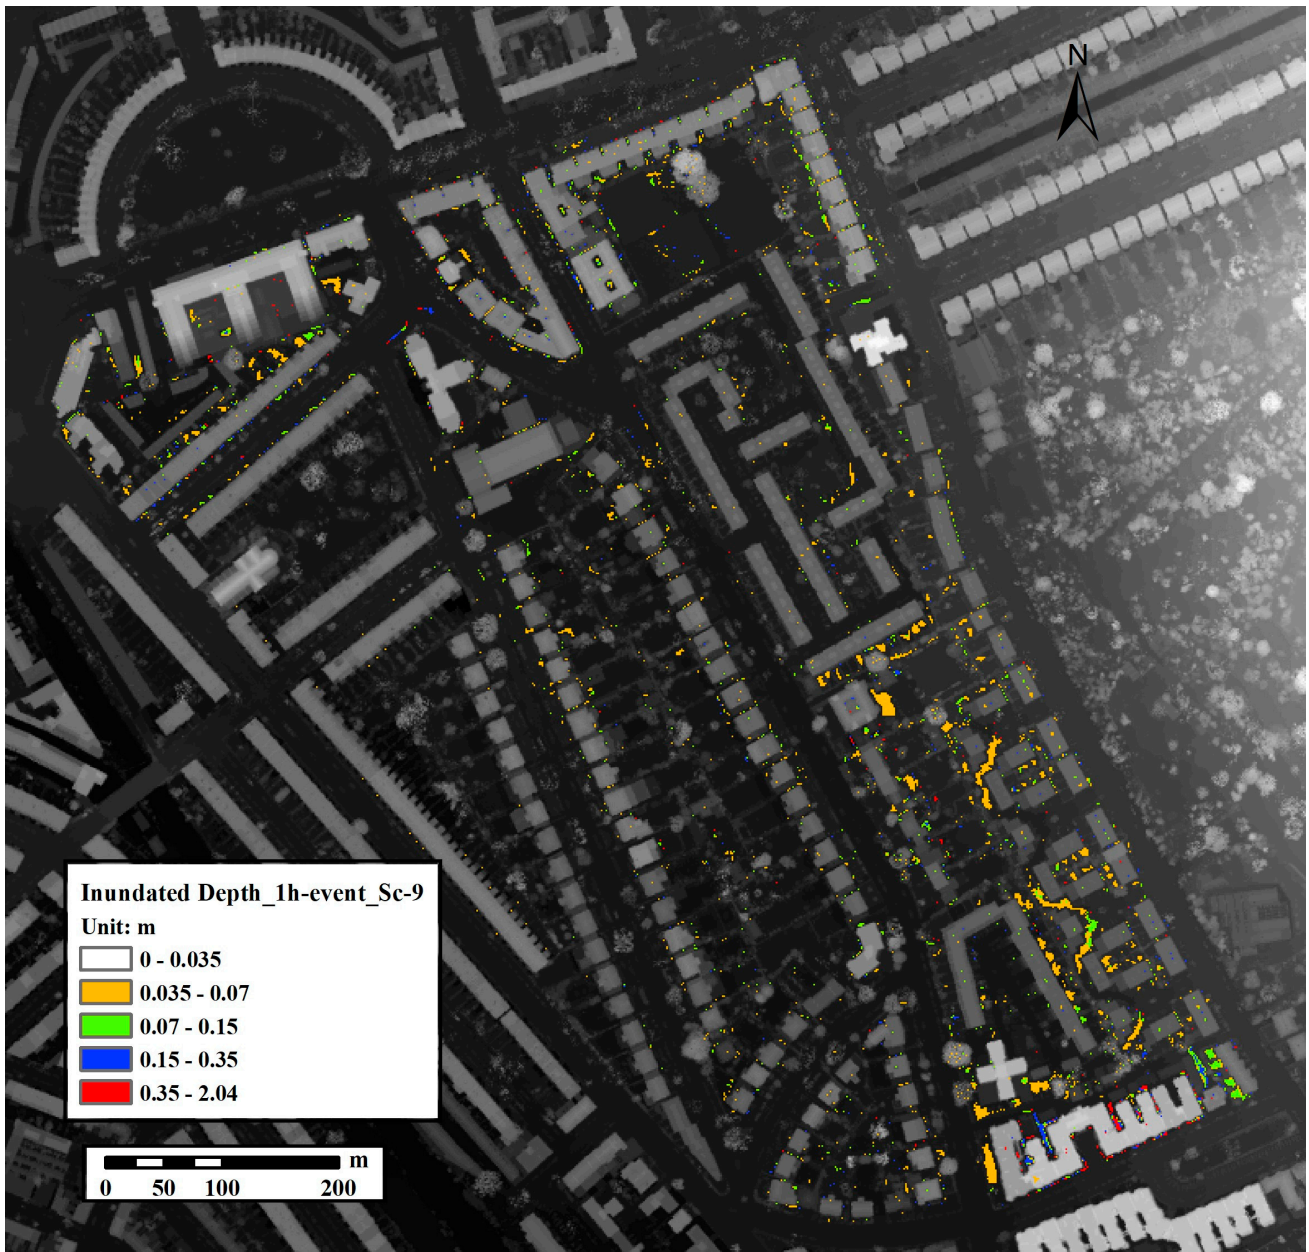

Fig. S38. Flood map of scenario 9 at the time of 2h (1-hour rainfall event)

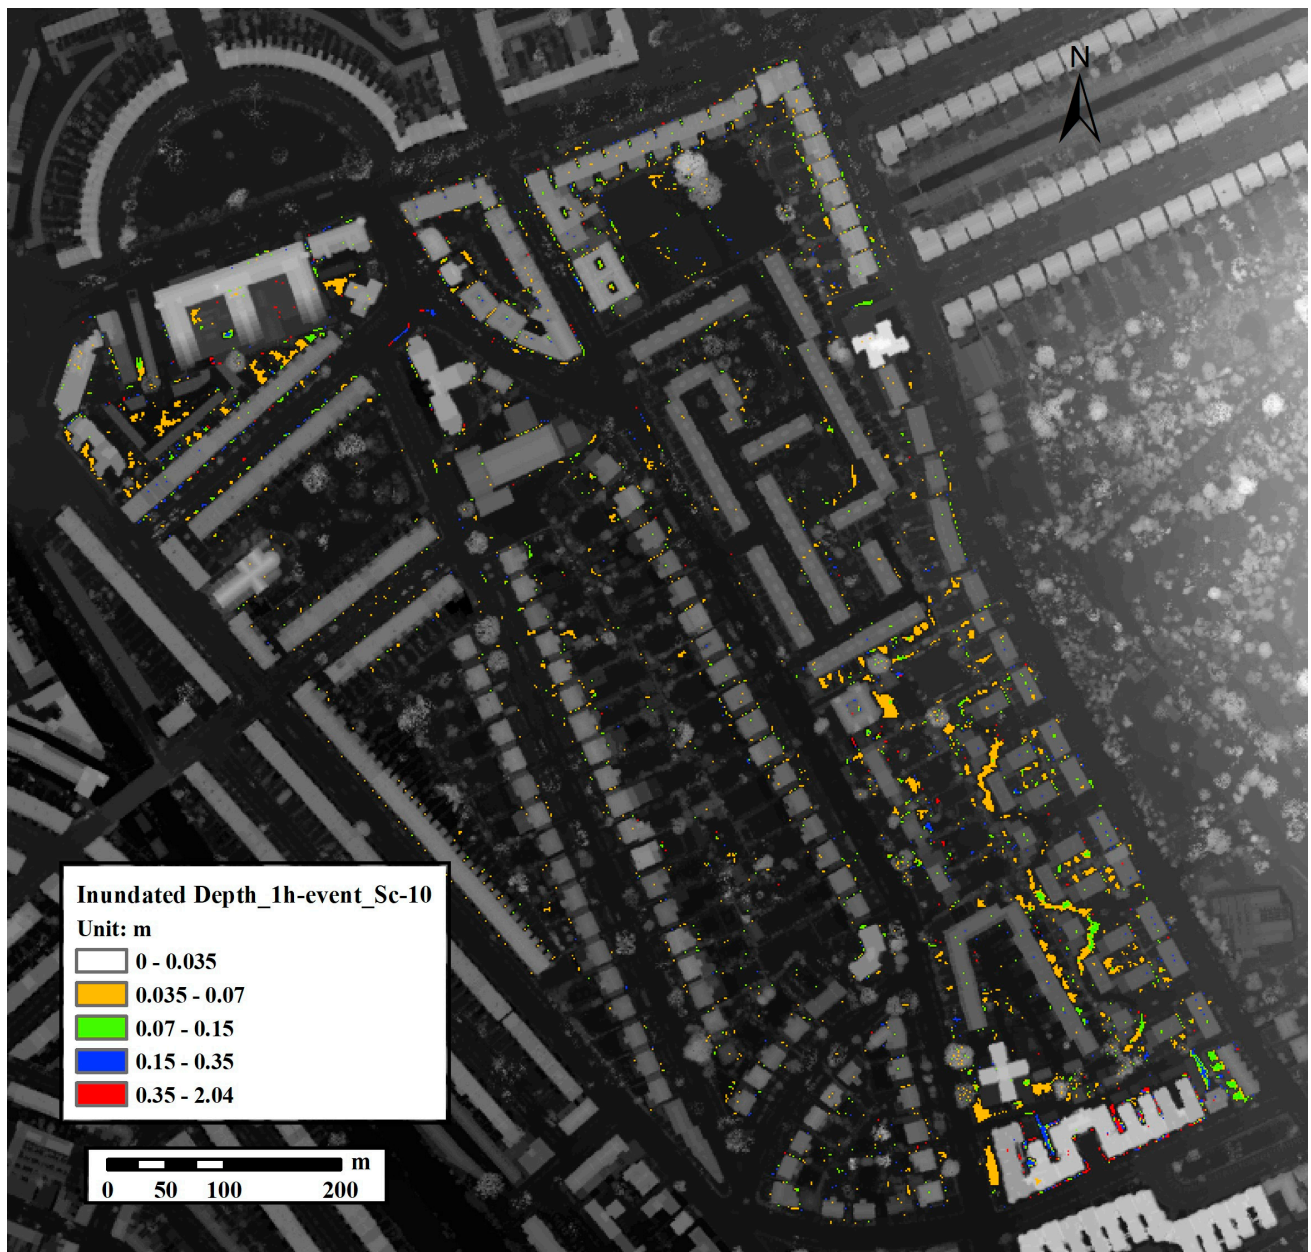

**Fig. S39.** Flood map of scenario 10 at the time of 2h (1-hour rainfall event)

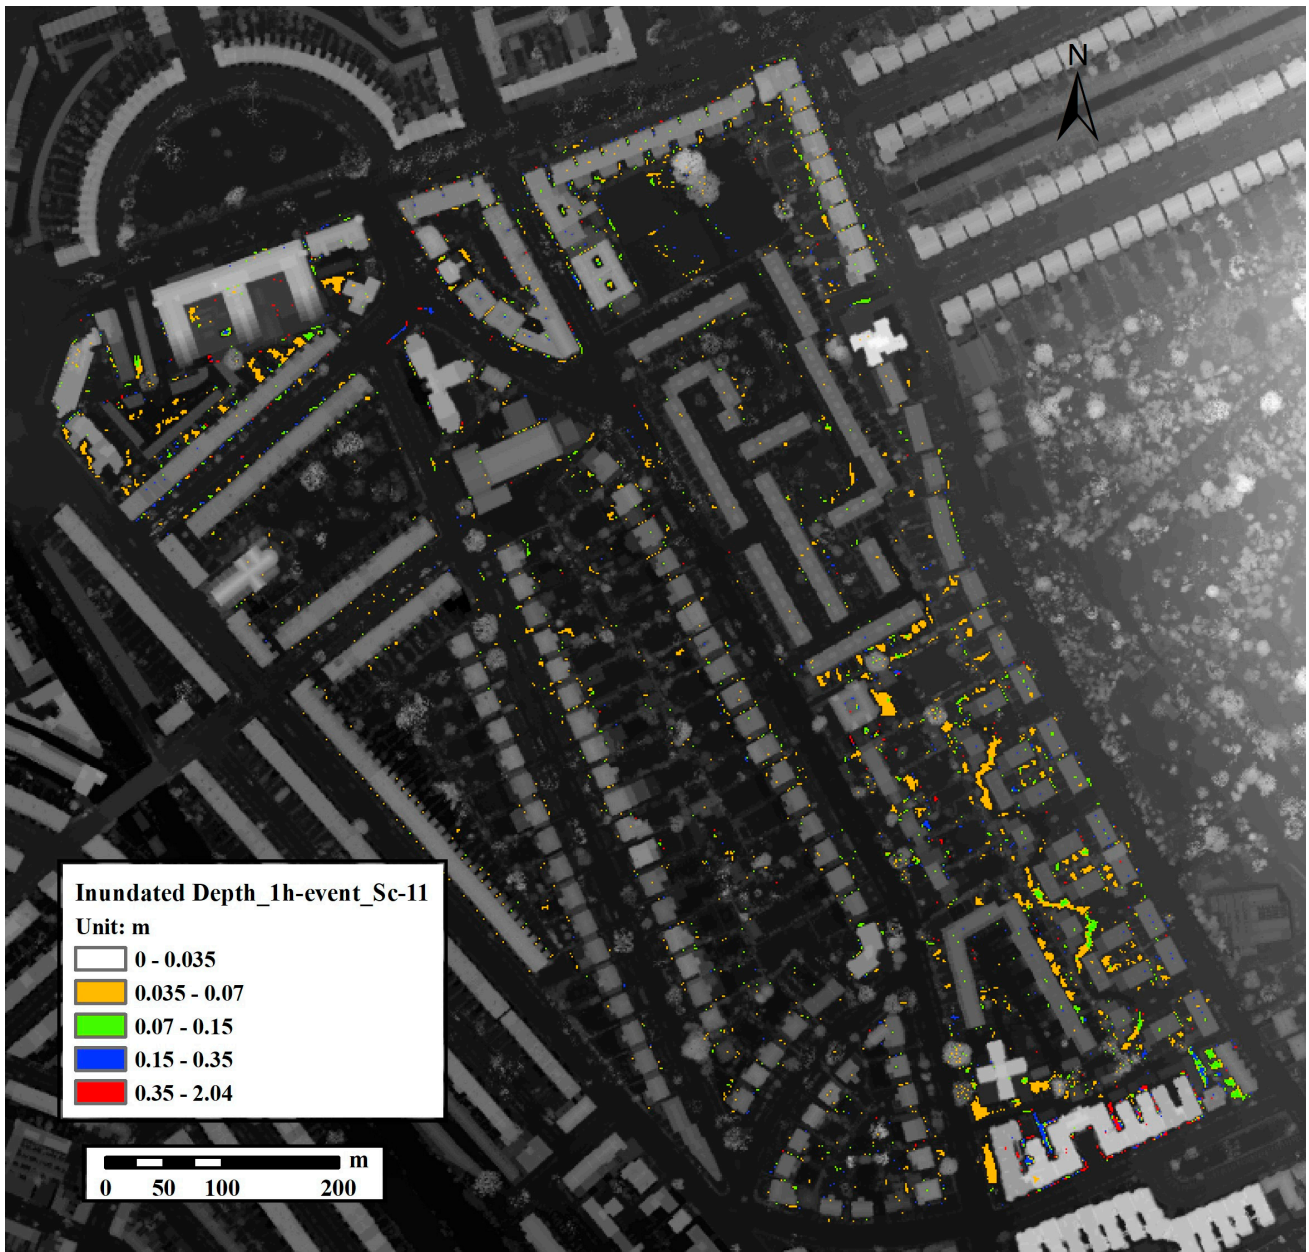

**Fig. S40.** Flood map of scenario 11 at the time of 2h (1-hour rainfall event)

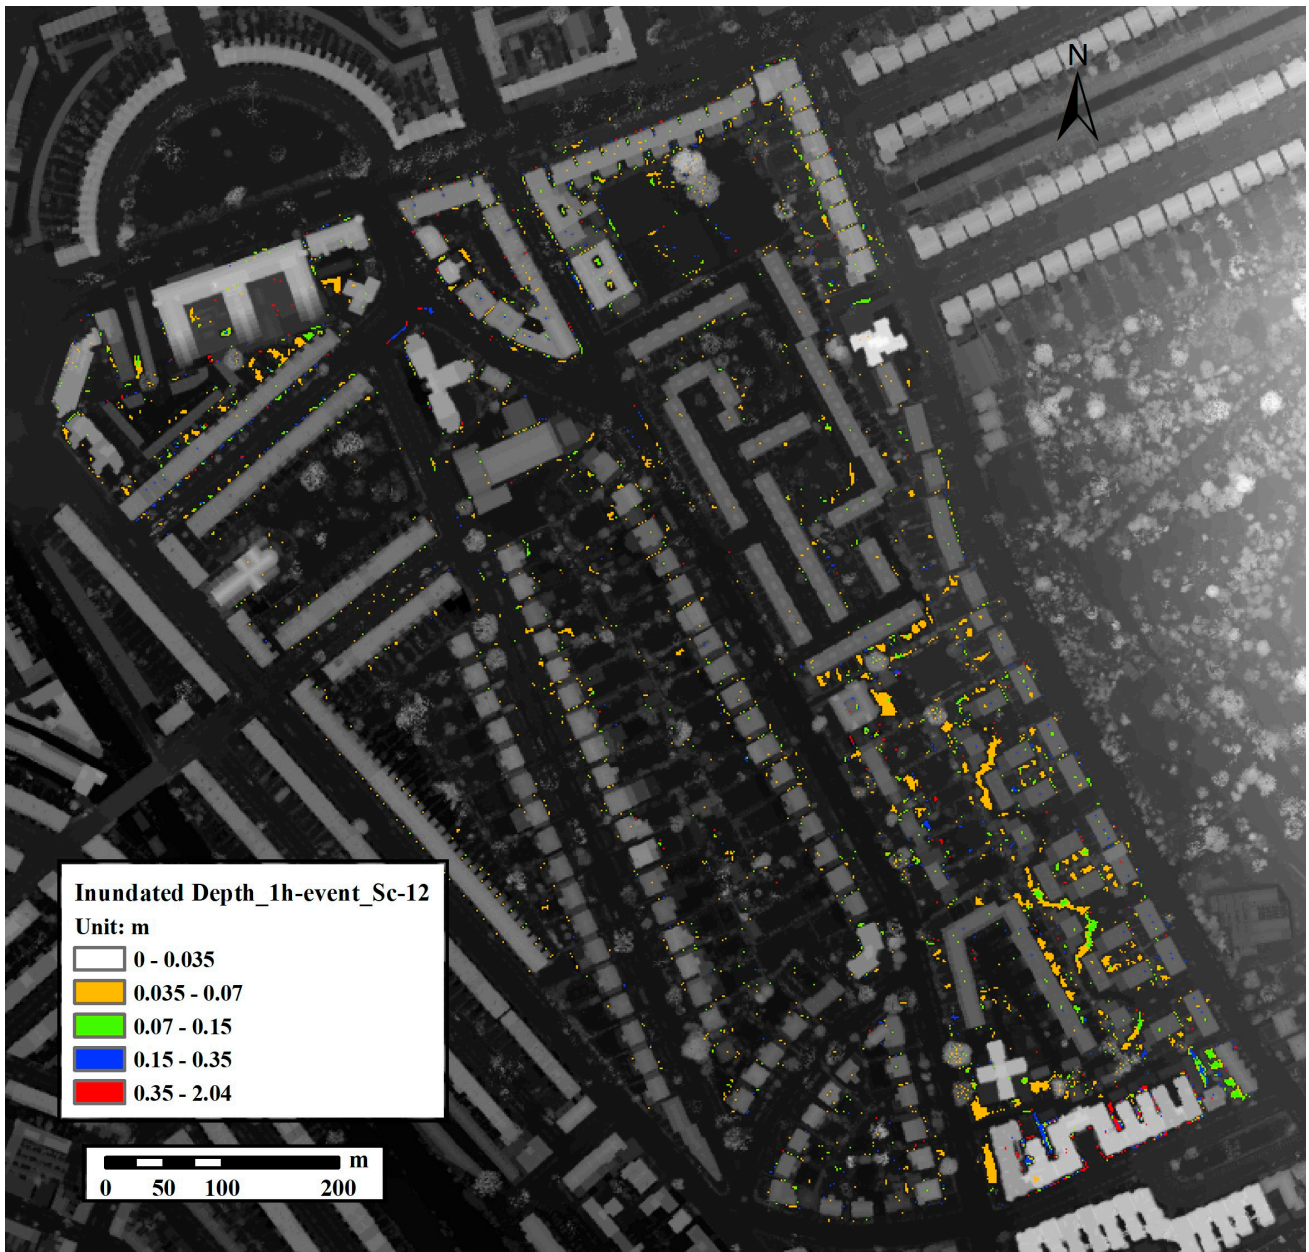

**Fig. S41.** Flood map of scenario 12 at the time of 2h (1-hour rainfall event)

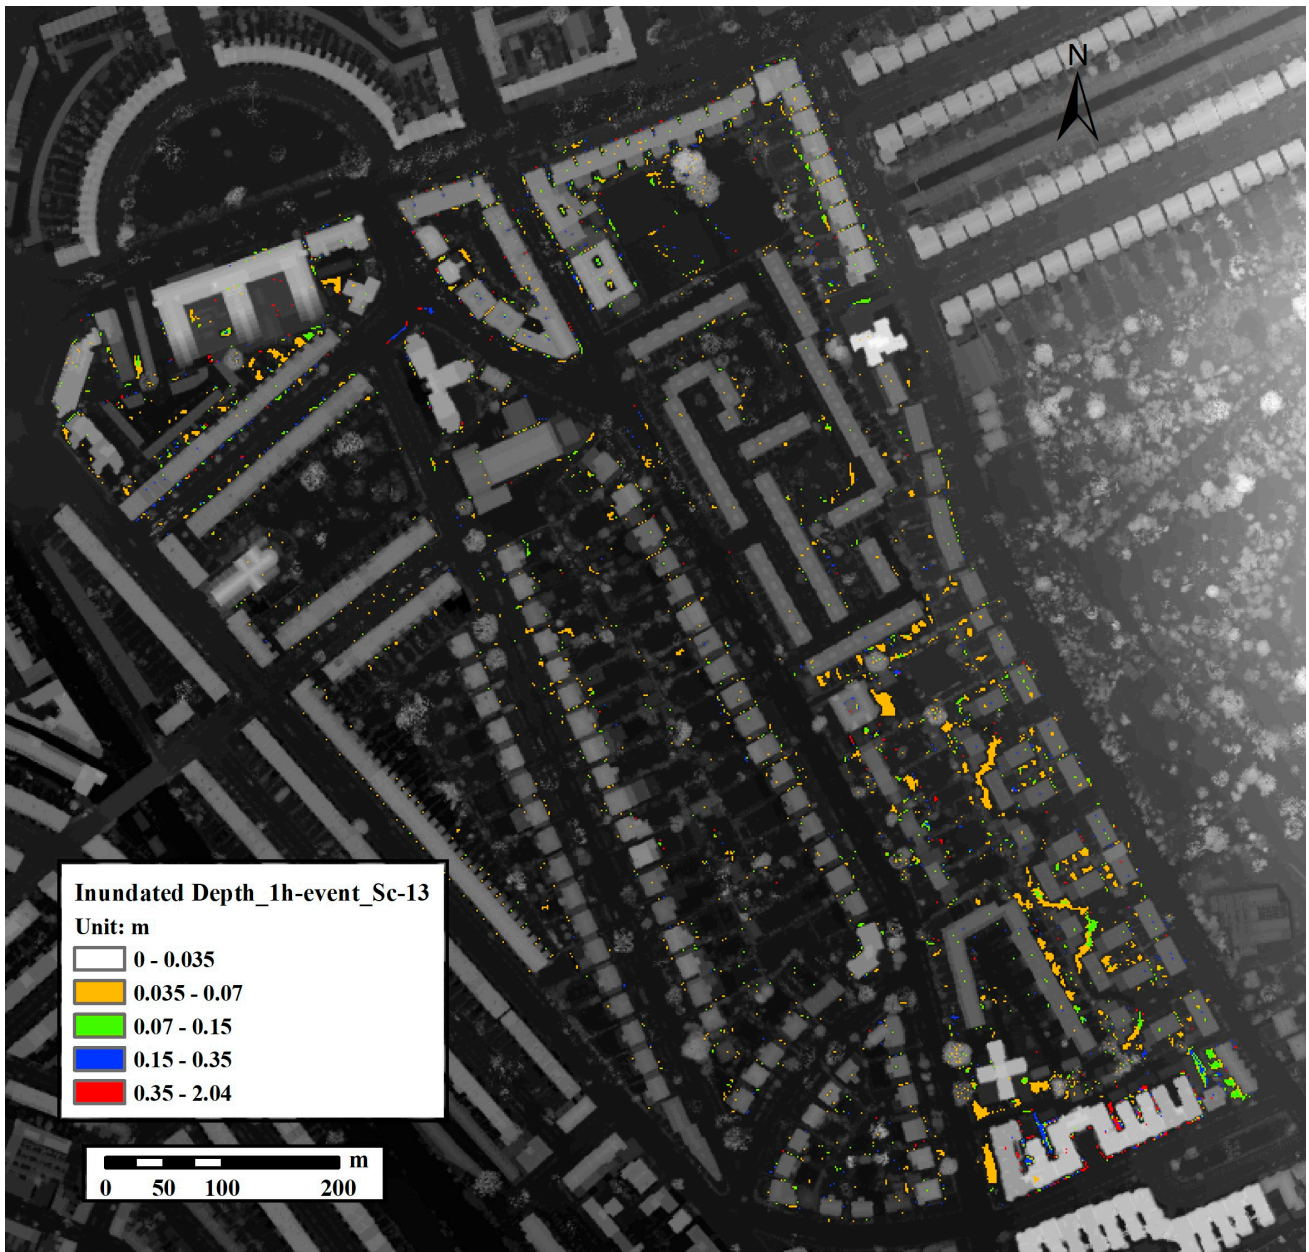

**Fig. S42.** Flood map of scenario 13 at the time of 2h (1-hour rainfall event)

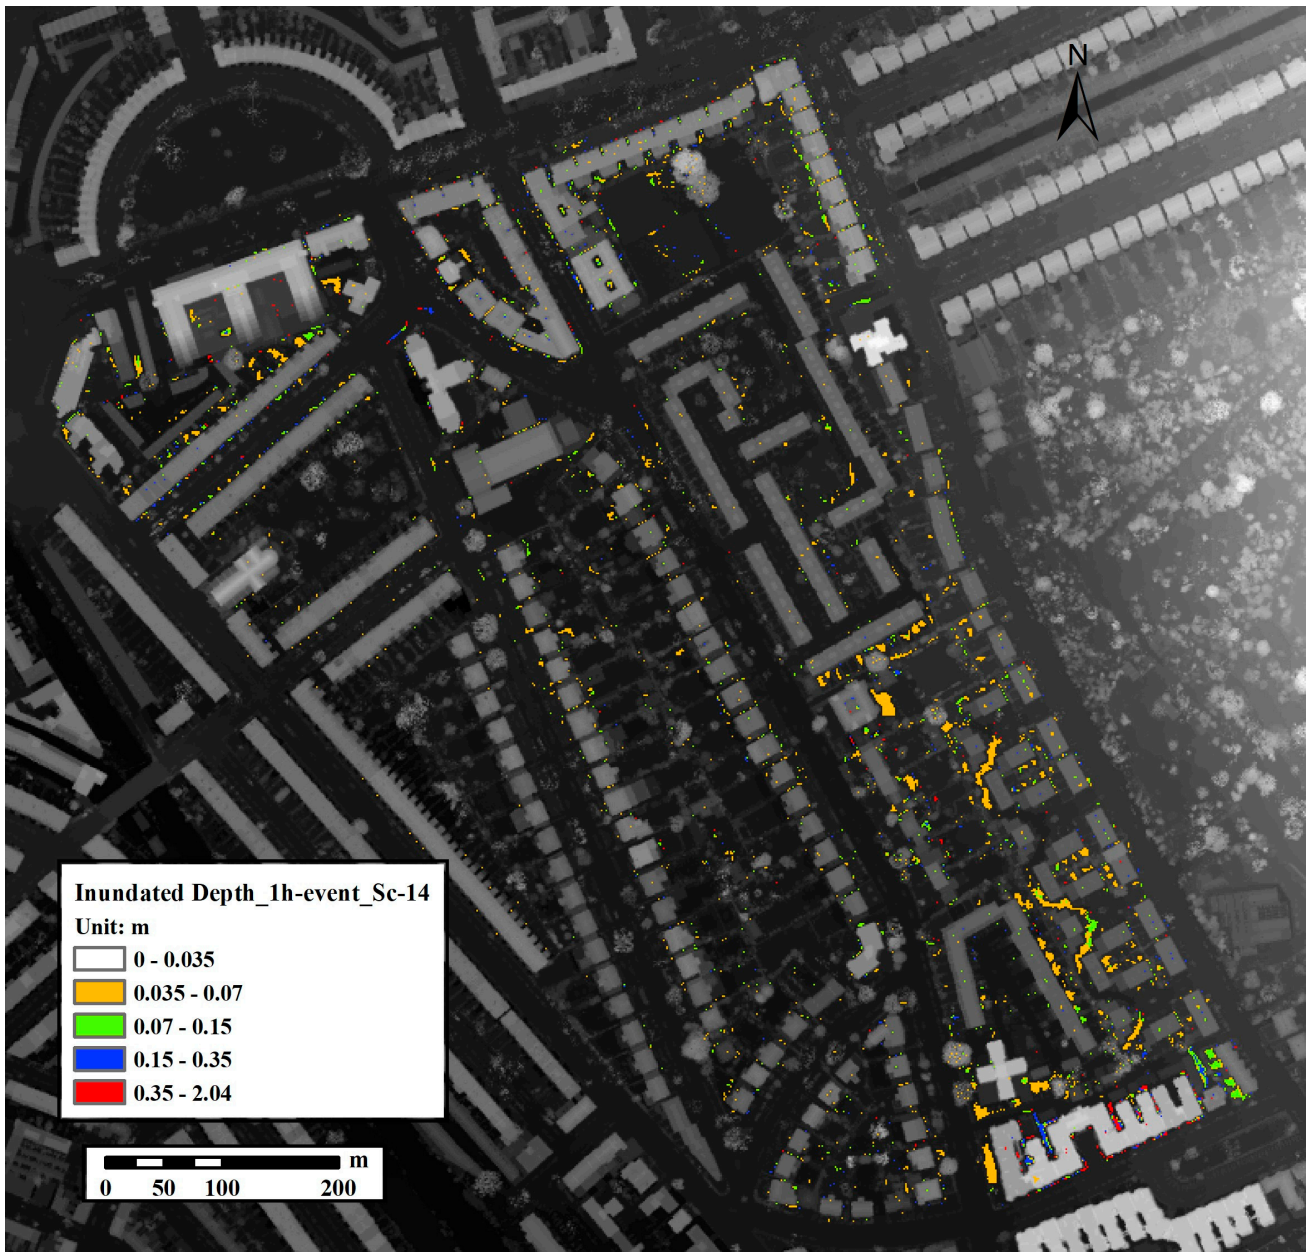

**Fig. S43.** Flood map of scenario 14 at the time of 2h (1-hour rainfall event)

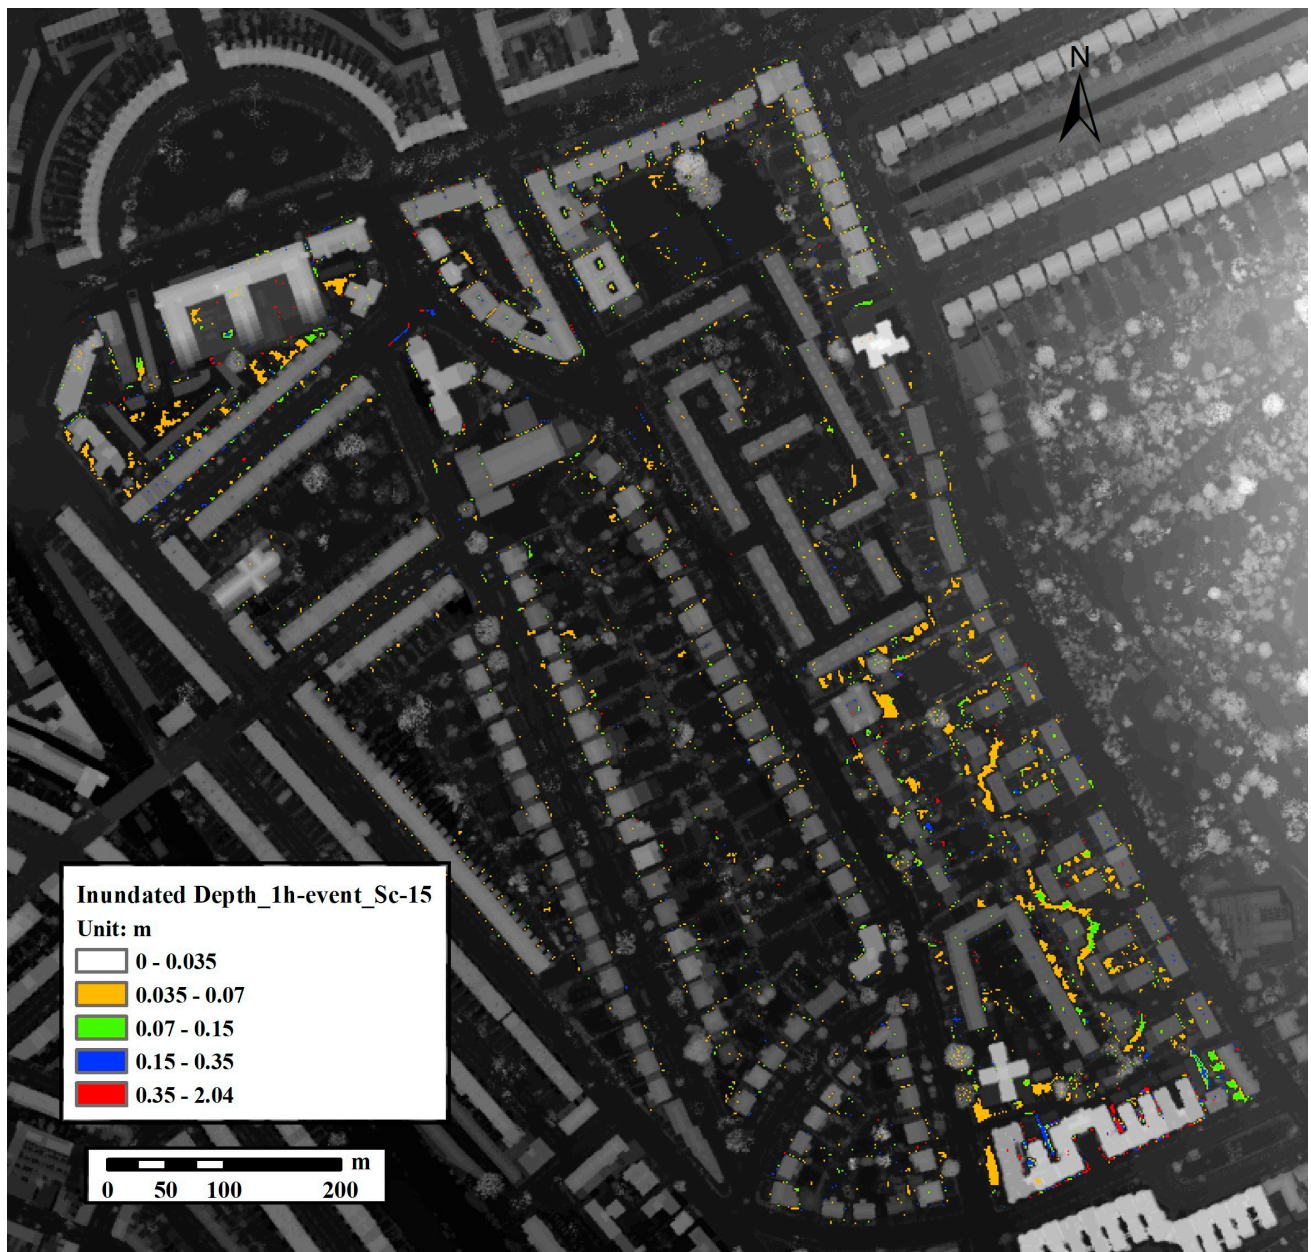

**Fig. S44.** Flood map of scenario 15 at the time of 2h (1-hour rainfall event)

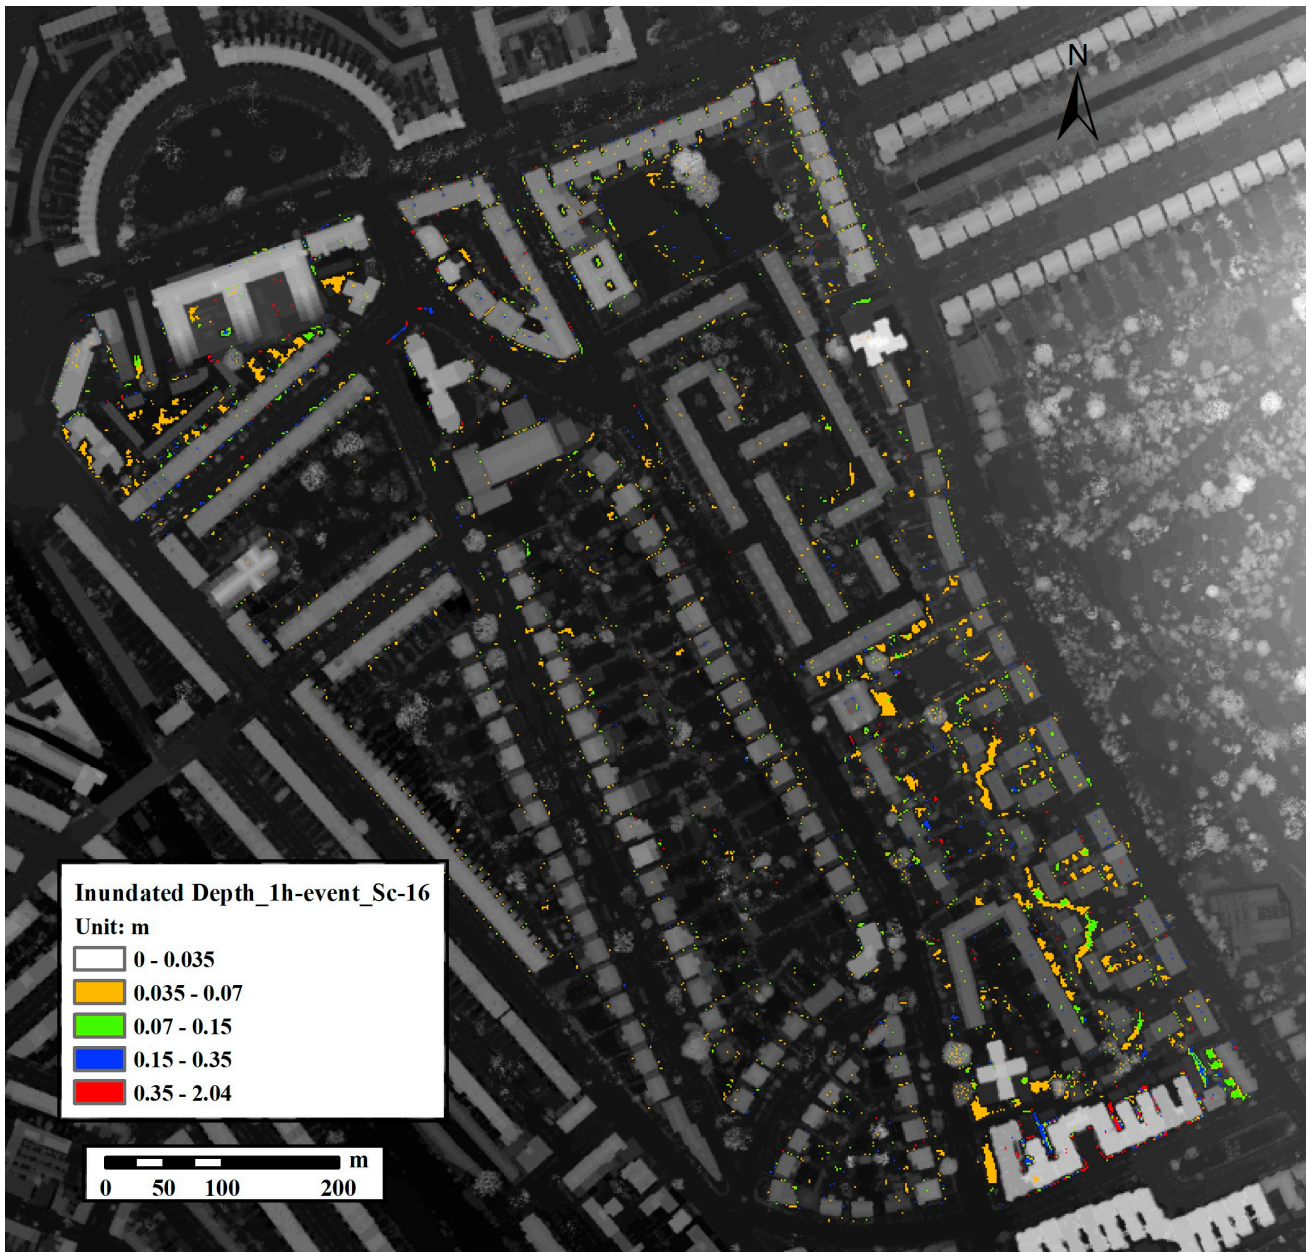

**Fig. S45.** Flood map of scenario 16 at the time of 2h (1-hour rainfall event)

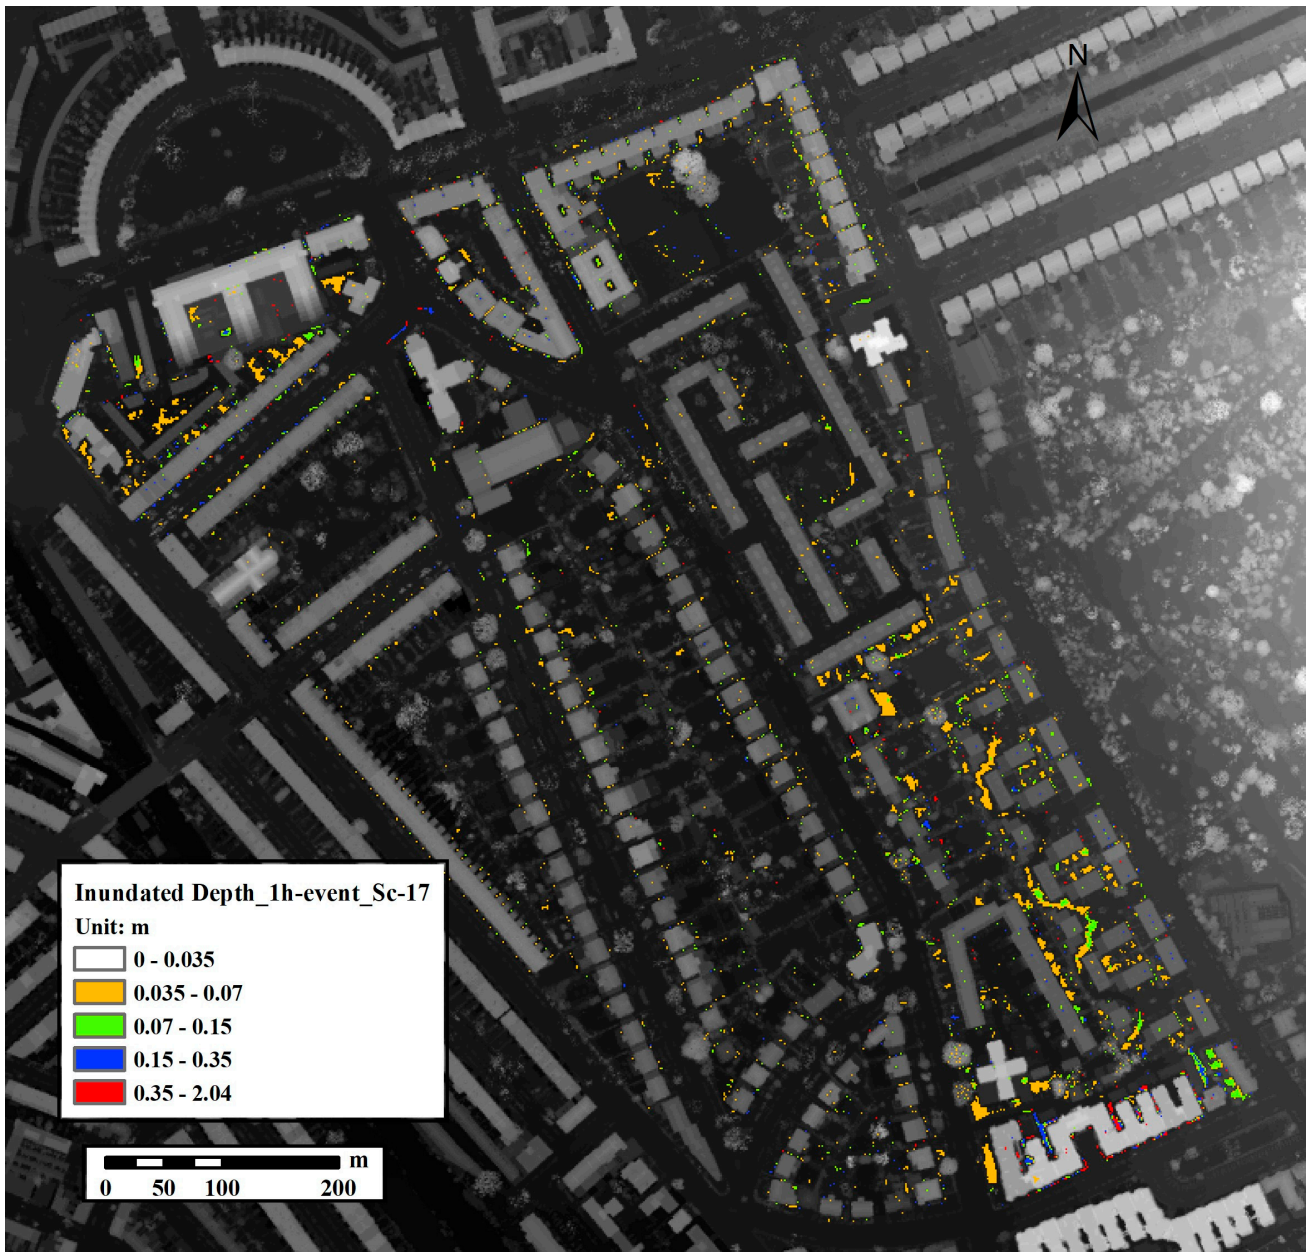

**Fig. S46.** Flood map of scenario 17 at the time of 2h (1-hour rainfall event)

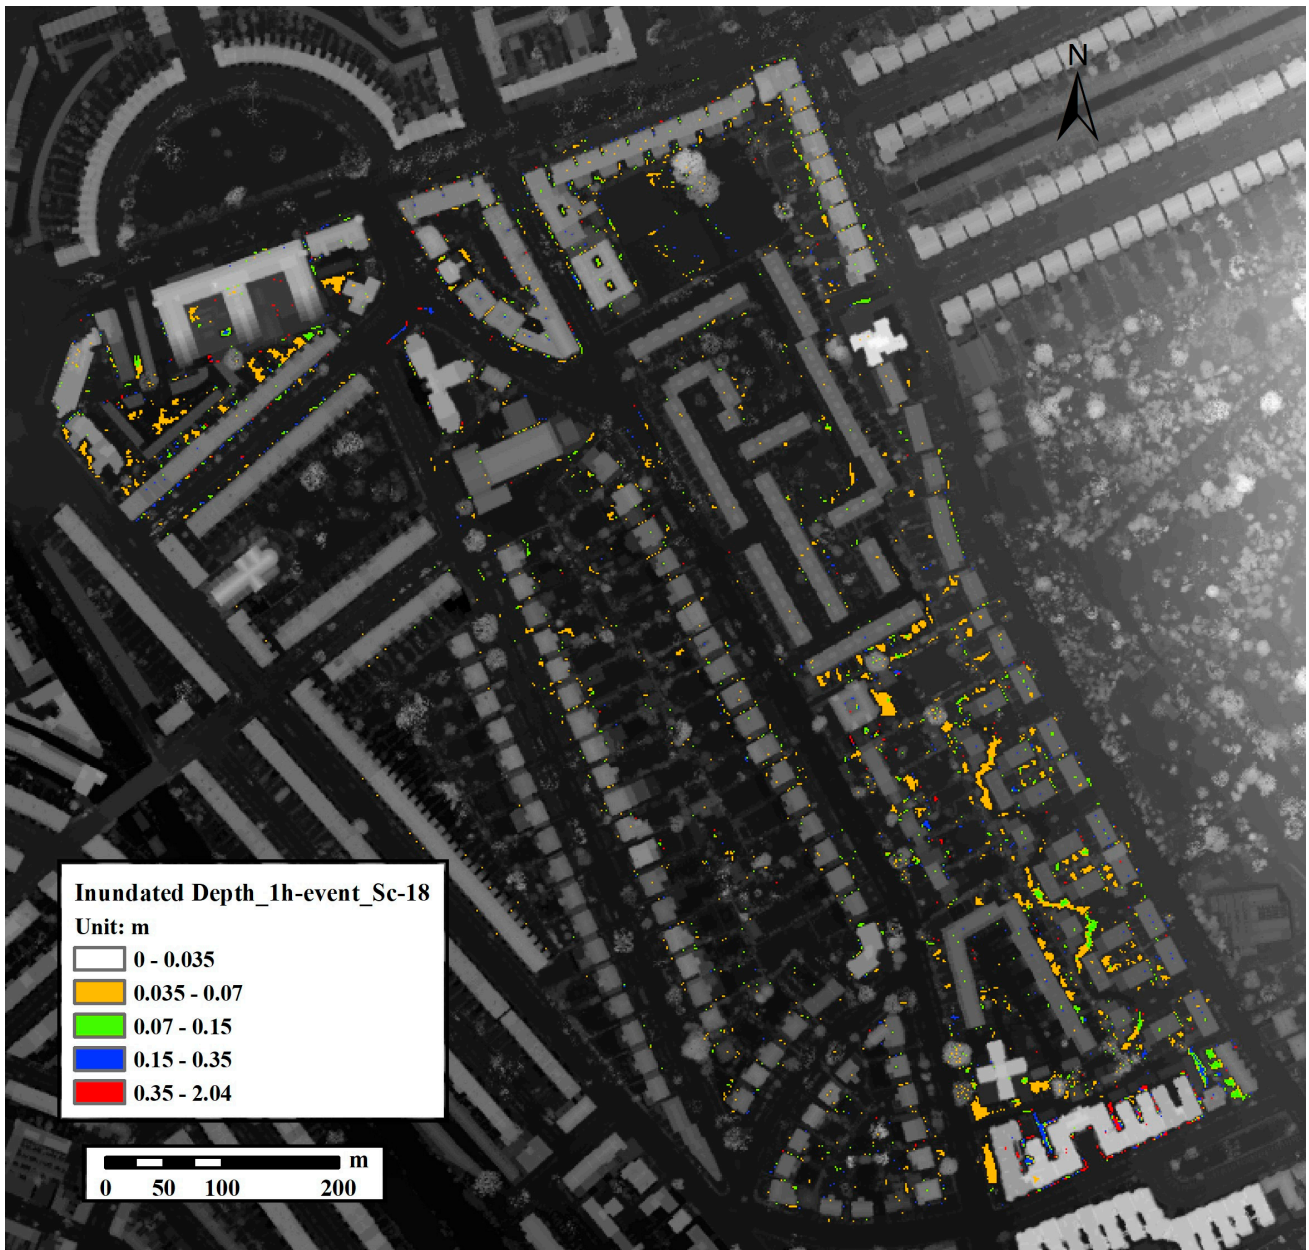

**Fig. S47.** Flood map of scenario 18 at the time of 2h (1-hour rainfall event)

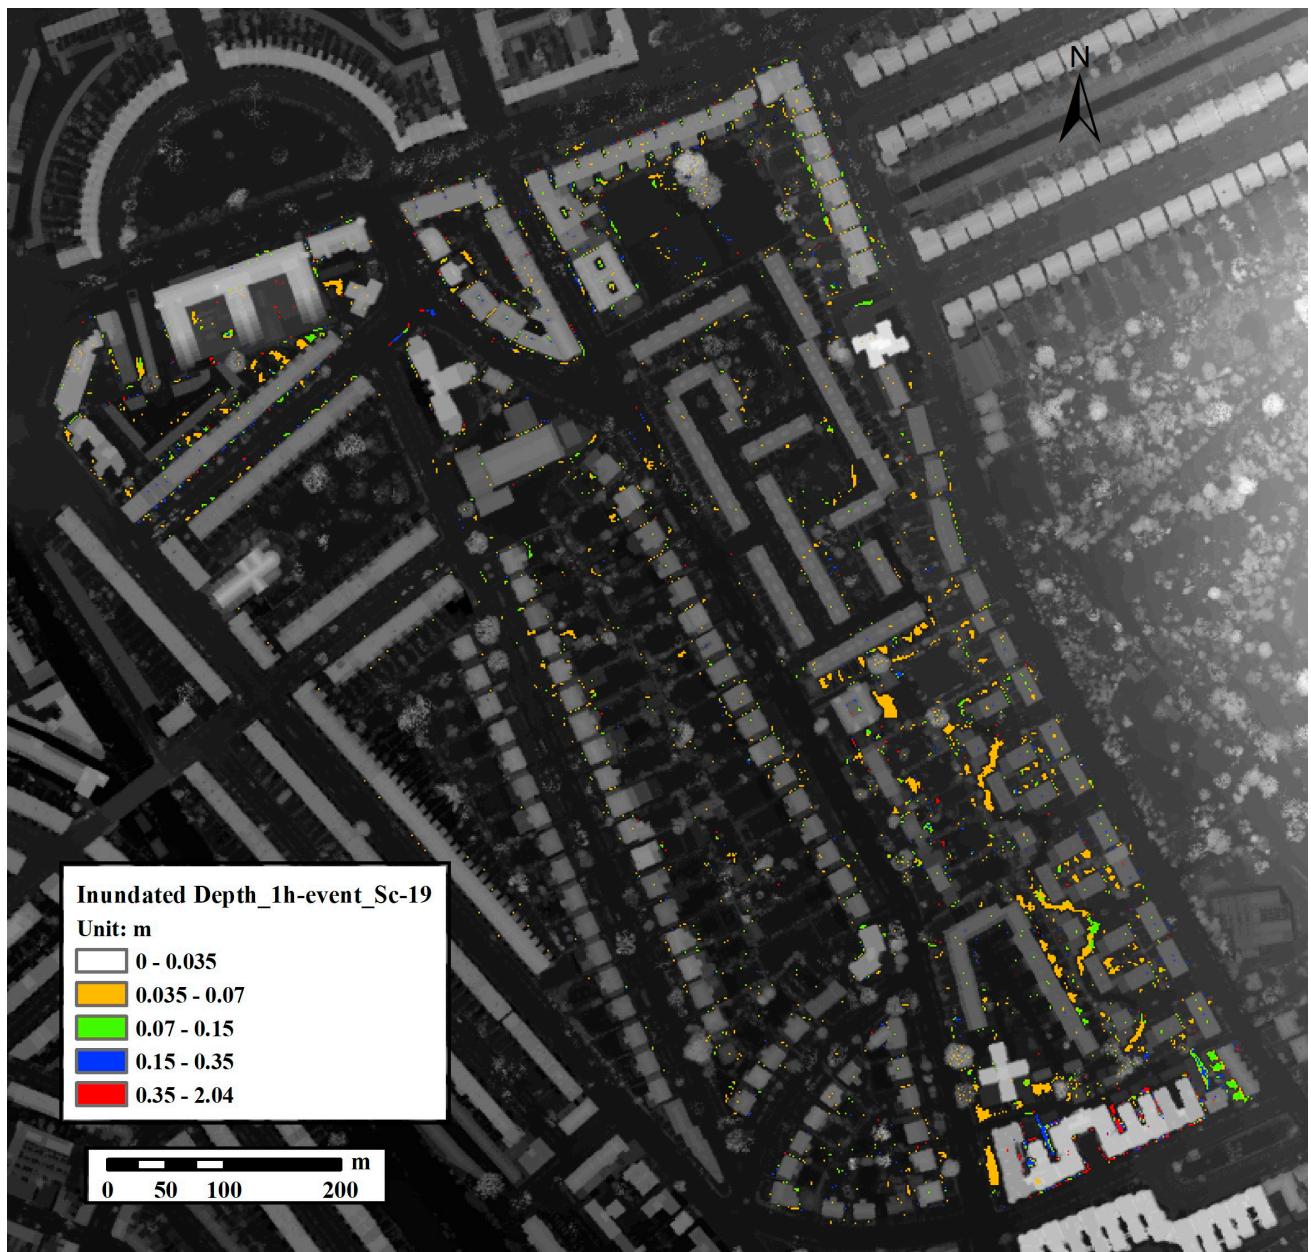

**Fig. S48.** Flood map of scenario 19 at the time of 2h (1-hour rainfall event)

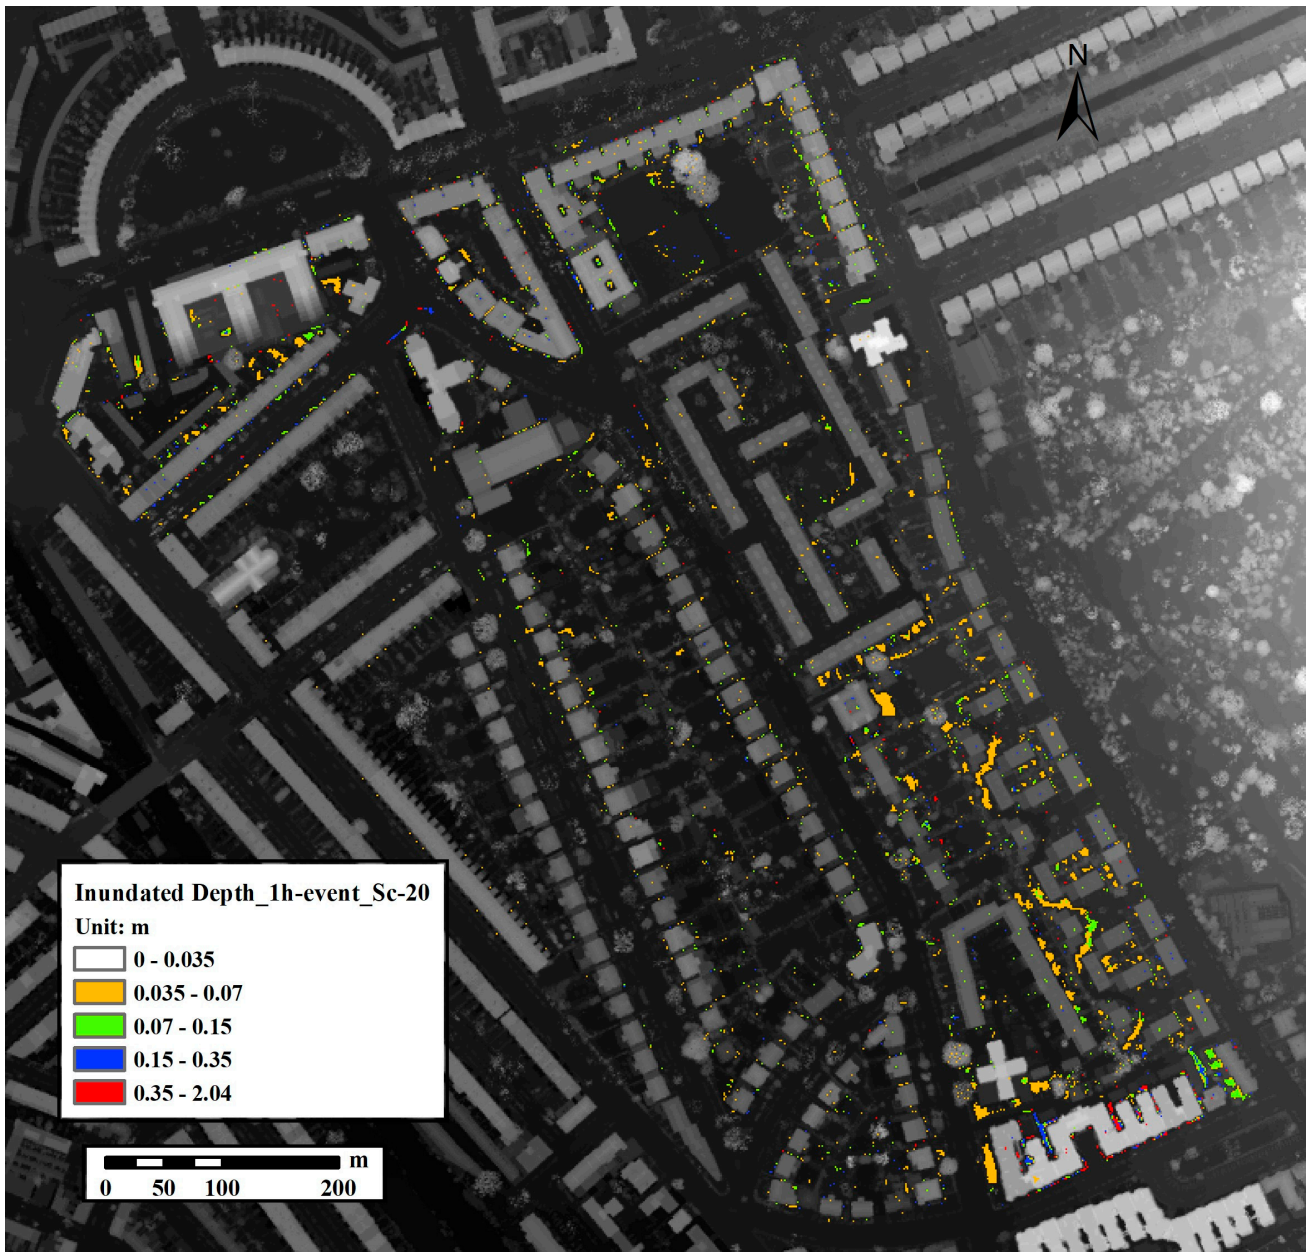

**Fig. S49.** Flood map of scenario 20 at the time of 2h (1-hour rainfall event)

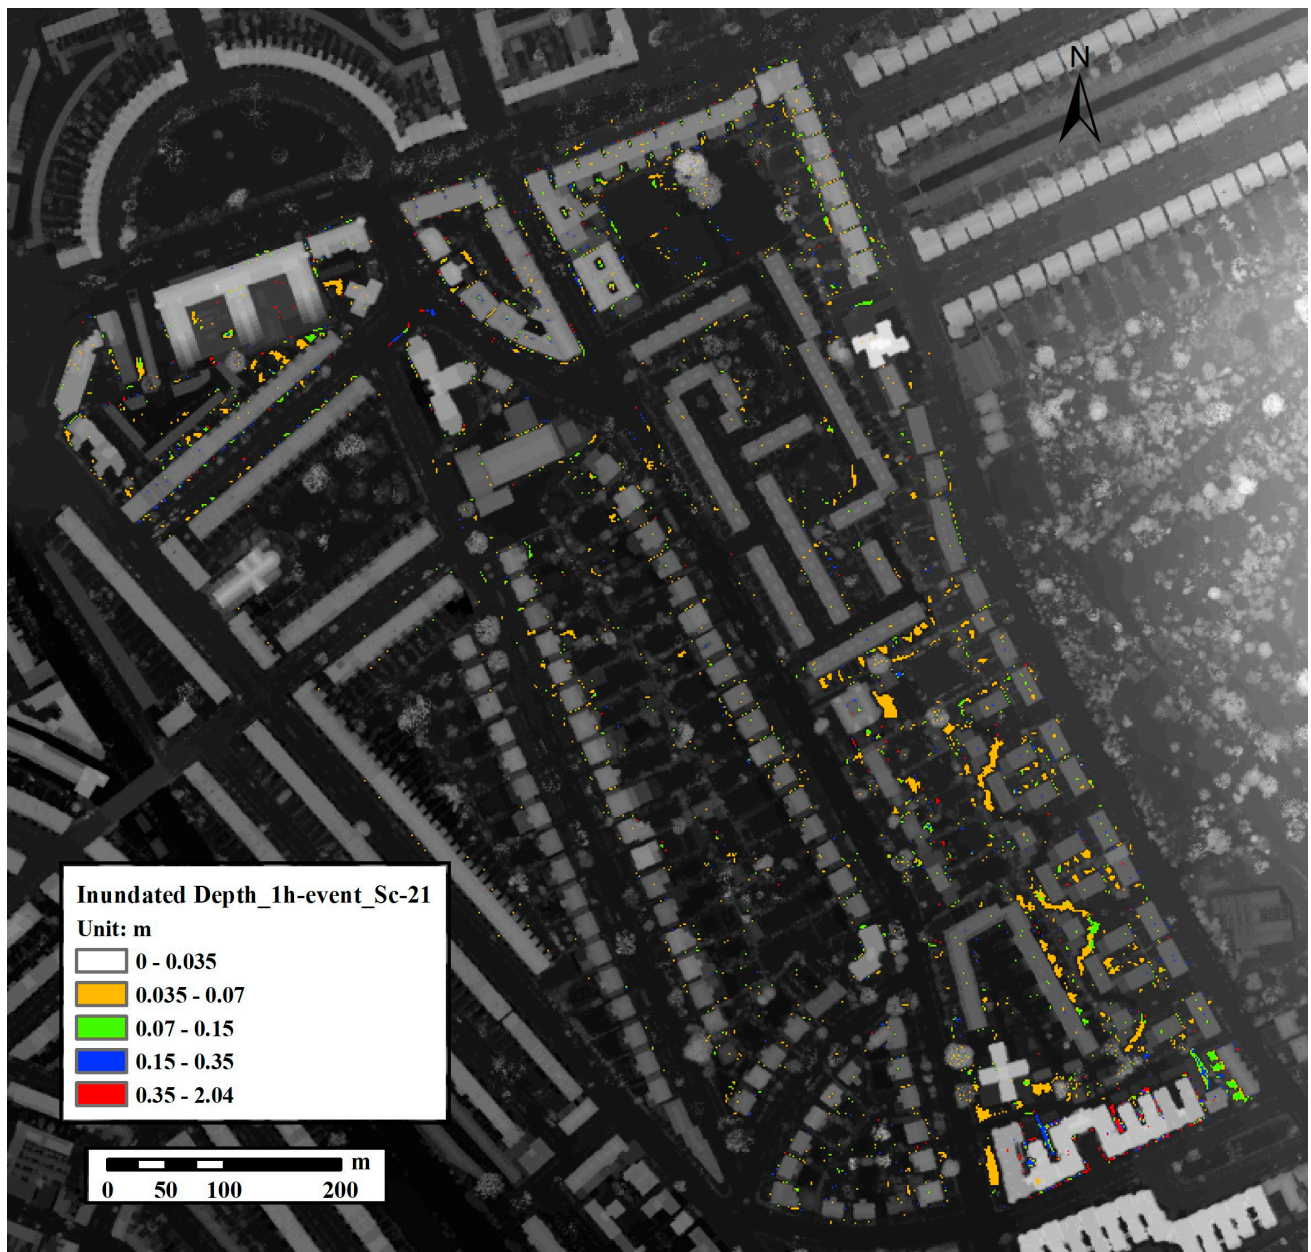

**Fig. S50.** Flood map of scenario 21 at the time of 2h (1-hour rainfall event)

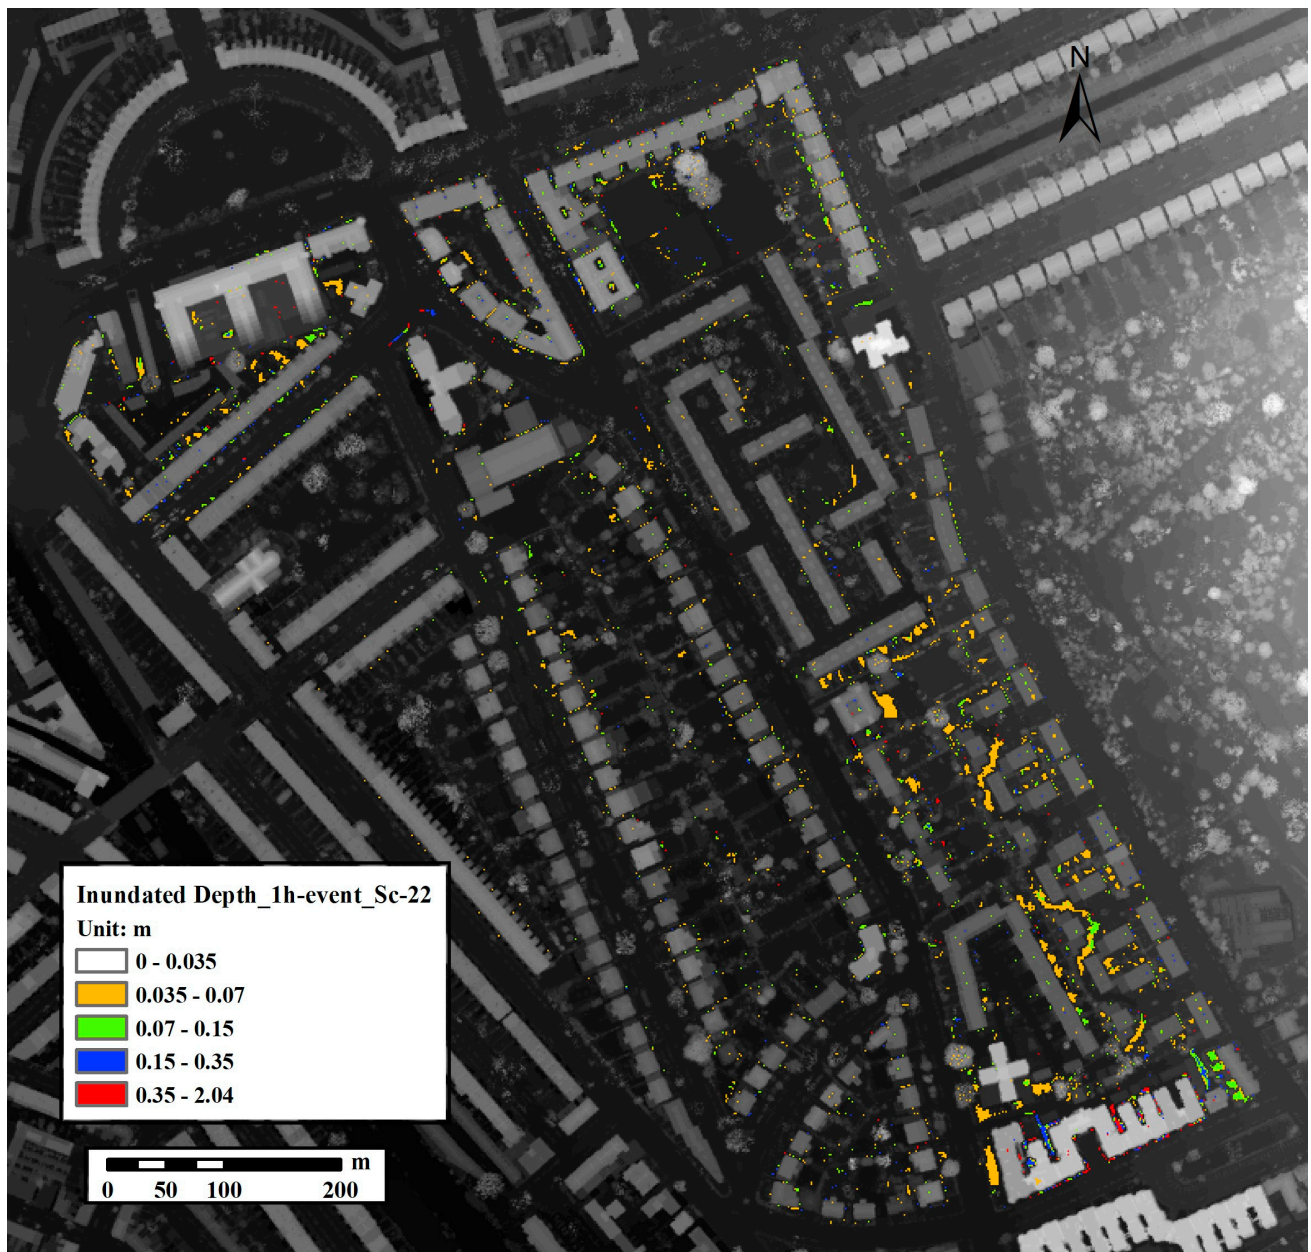

**Fig. S51.** Flood map of scenario 22 at the time of 2h (1-hour rainfall event)

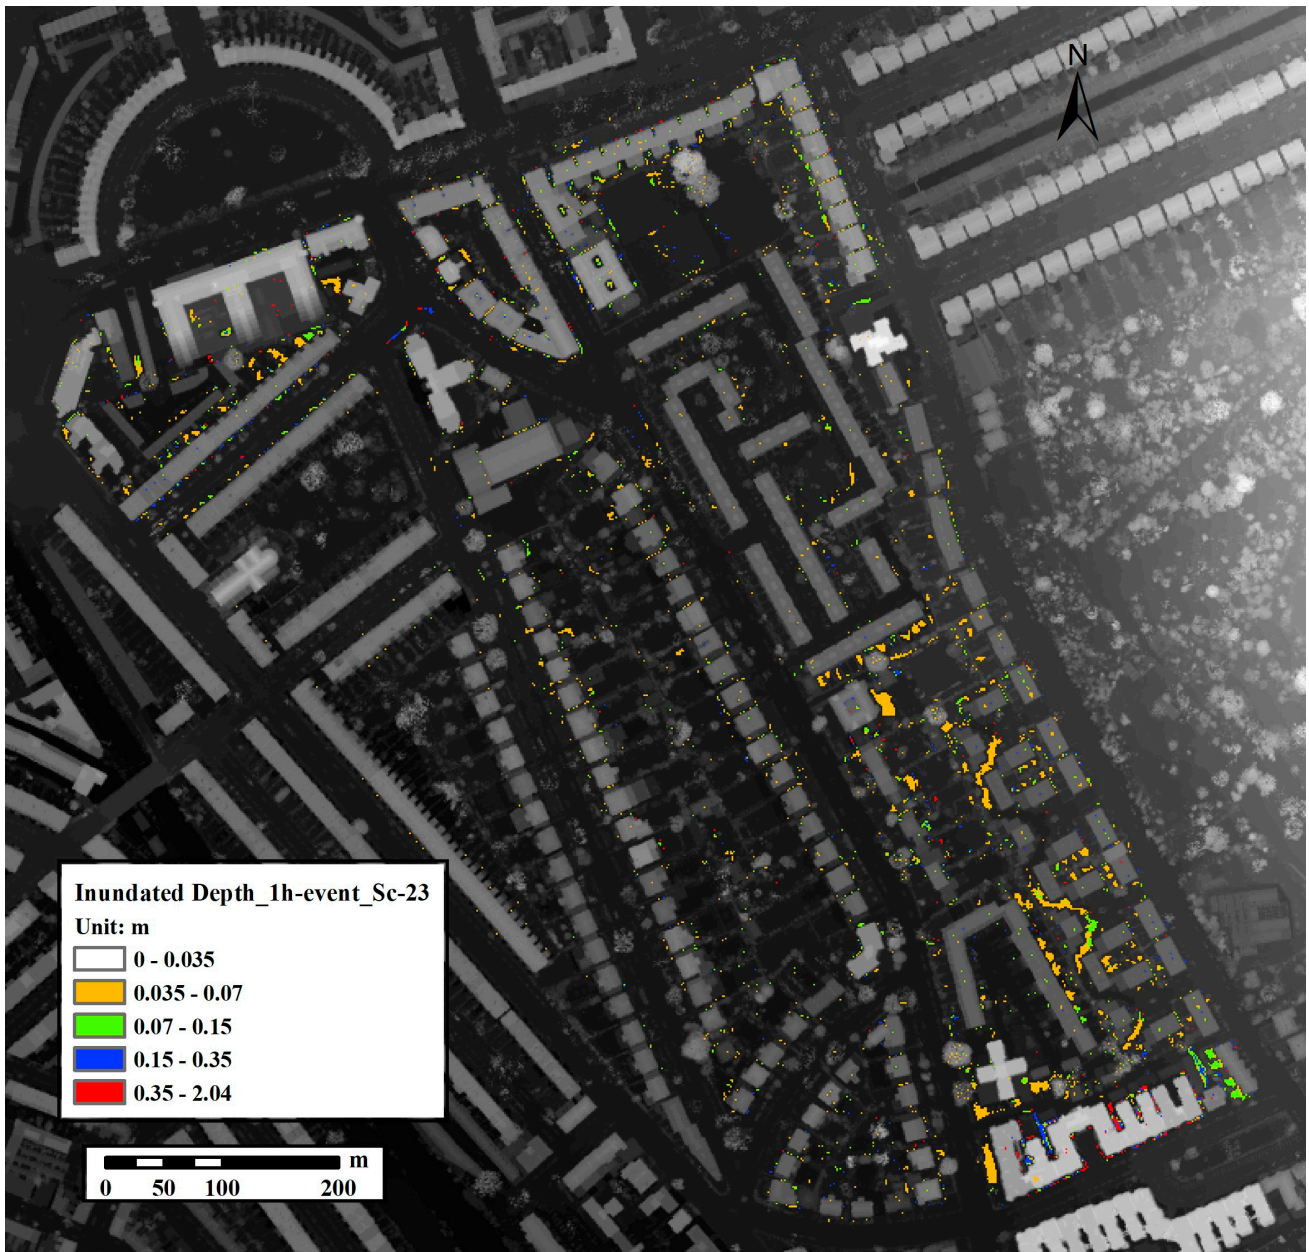

**Fig. S52.** Flood map of scenario 23 at the time of 2h (1-hour rainfall event)

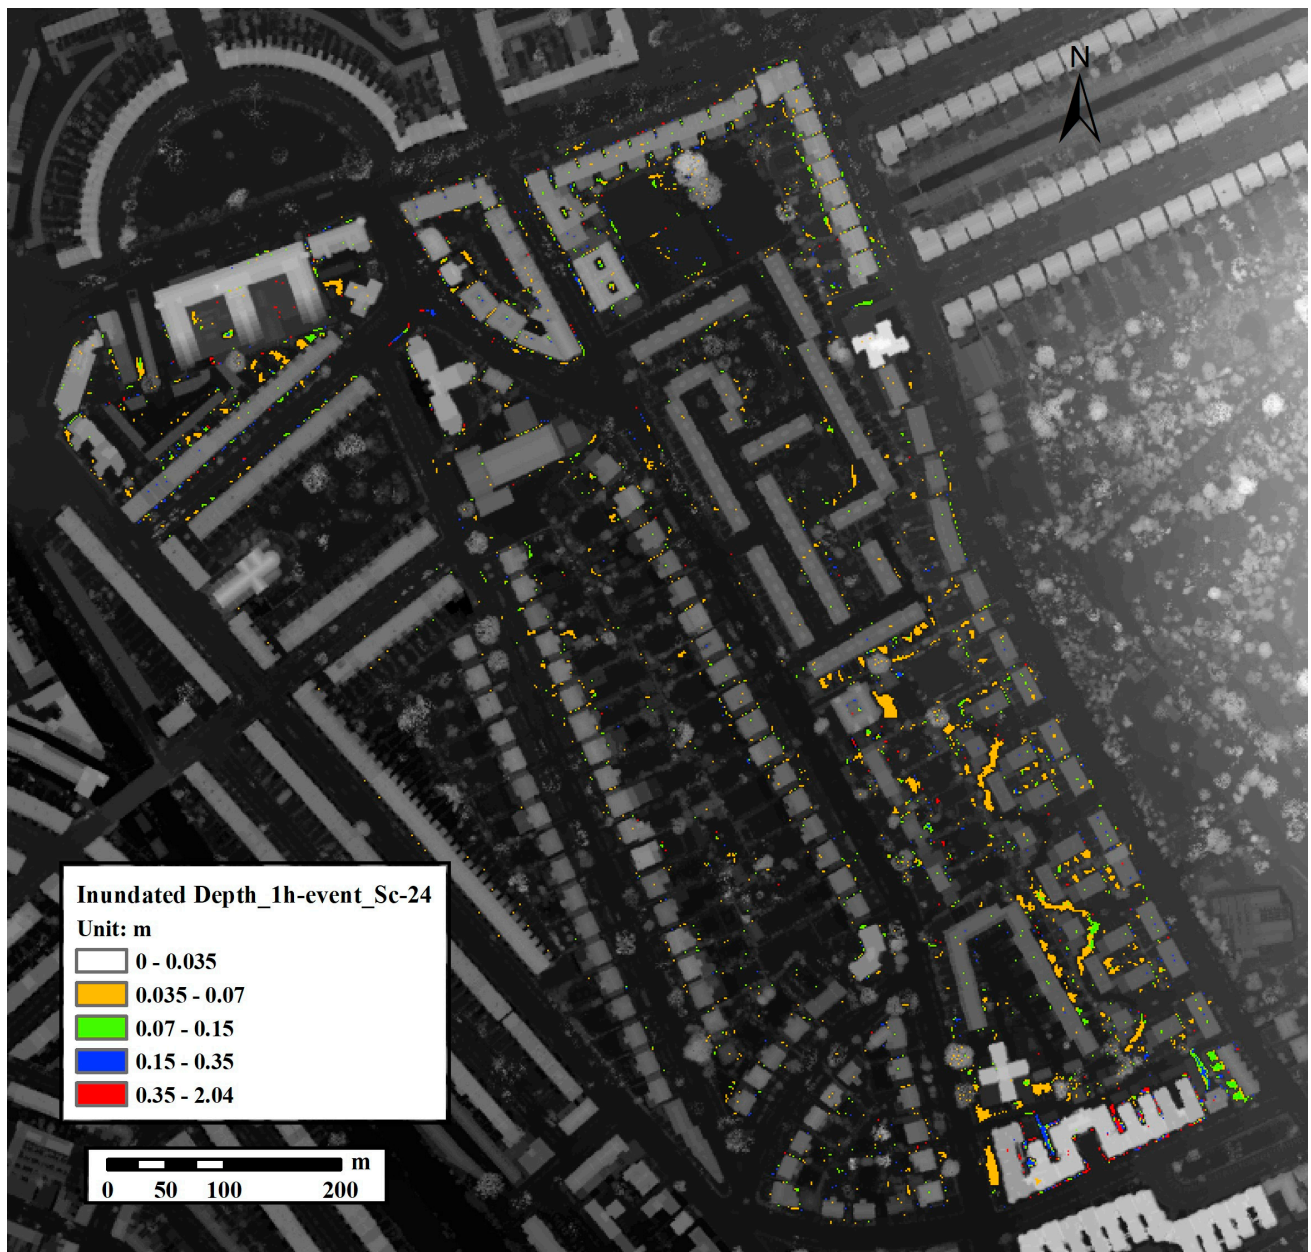

**Fig. S53.** Flood map of scenario 24 at the time of 2h (1-hour rainfall event)

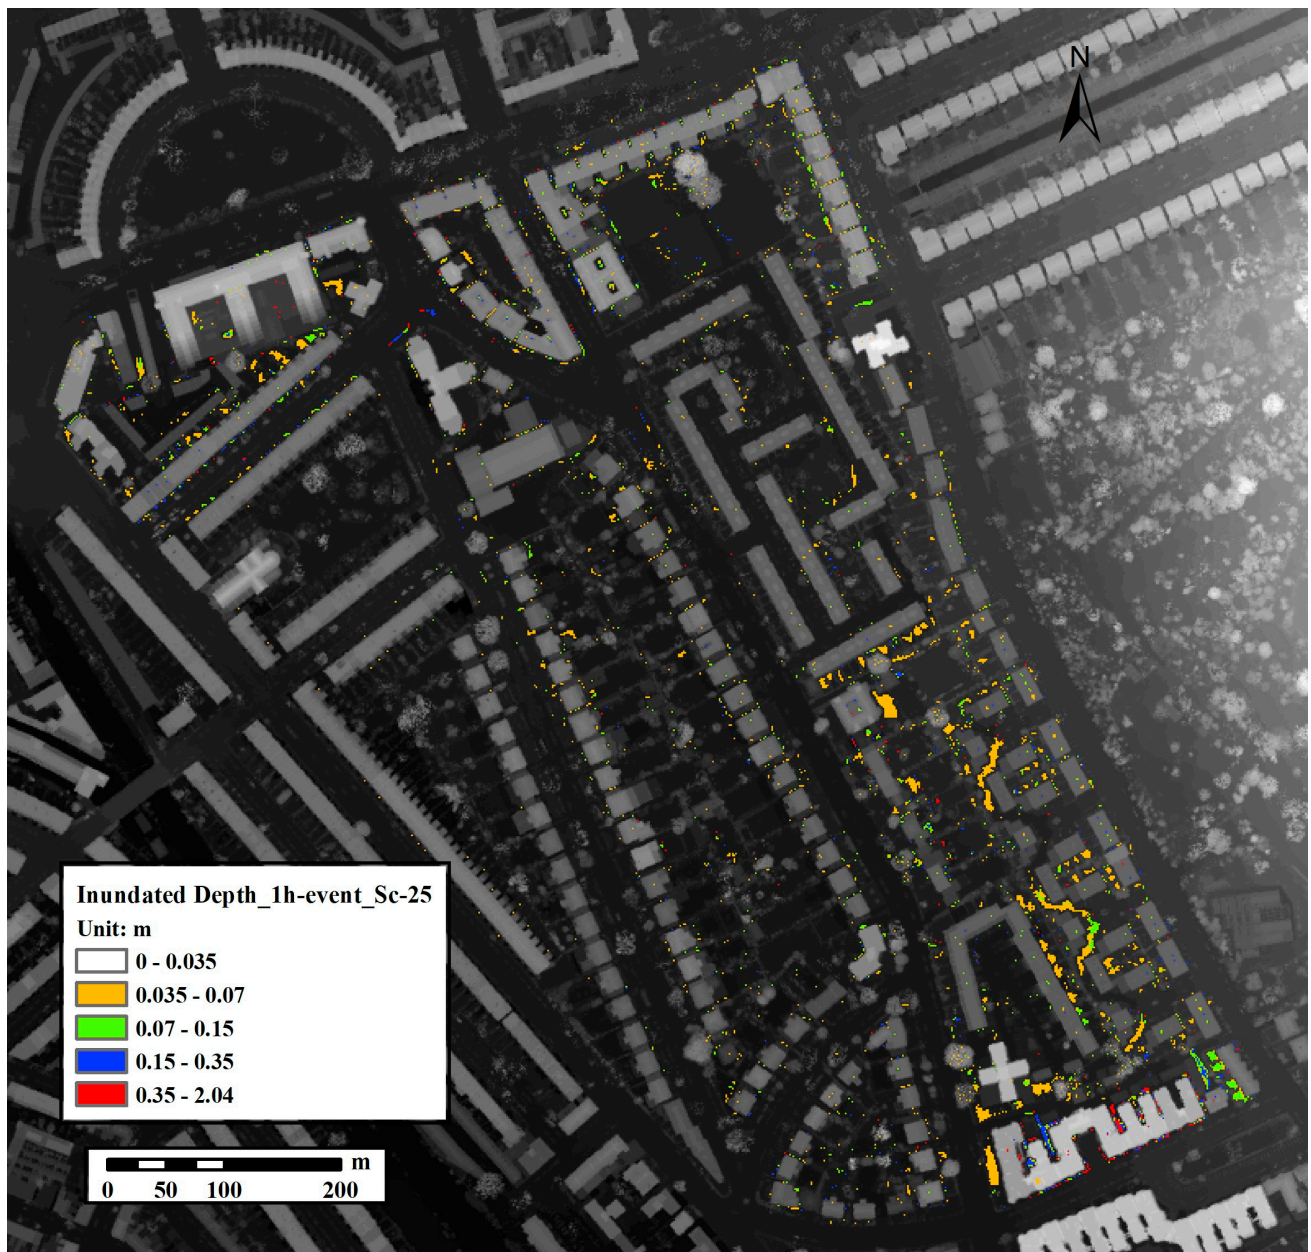

**Fig. S54.** Flood map of scenario 25 at the time of 2h (1-hour rainfall event)

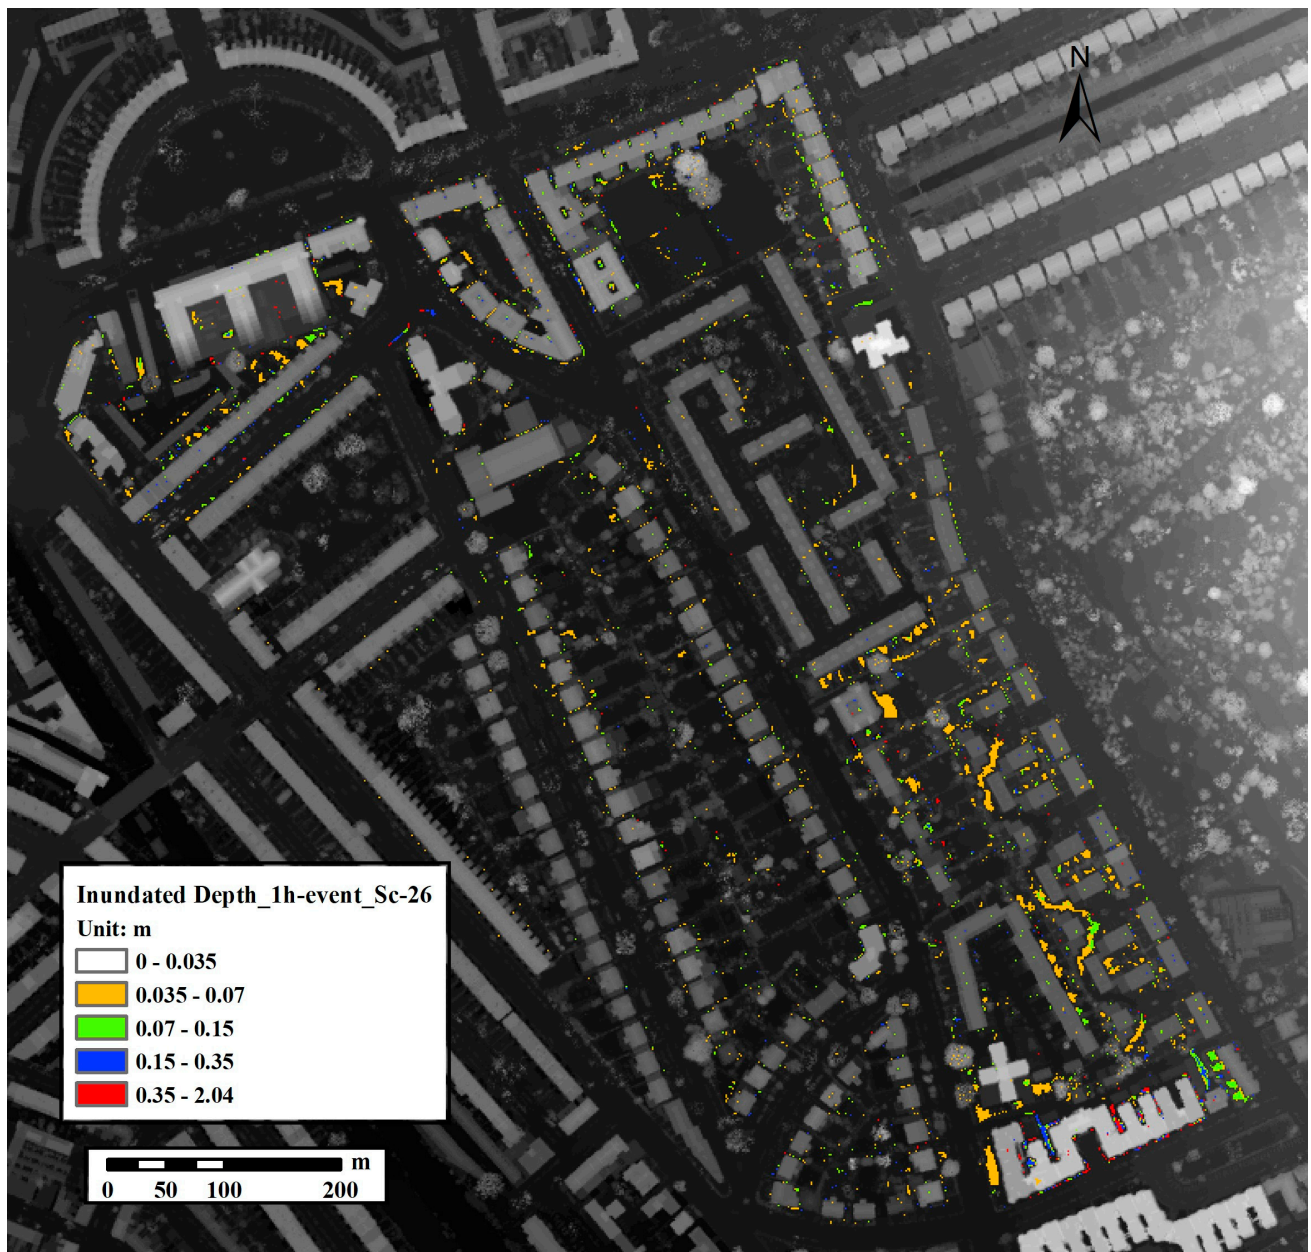

**Fig. S55.** Flood map of scenario 26 at the time of 2h (1-hour rainfall event)

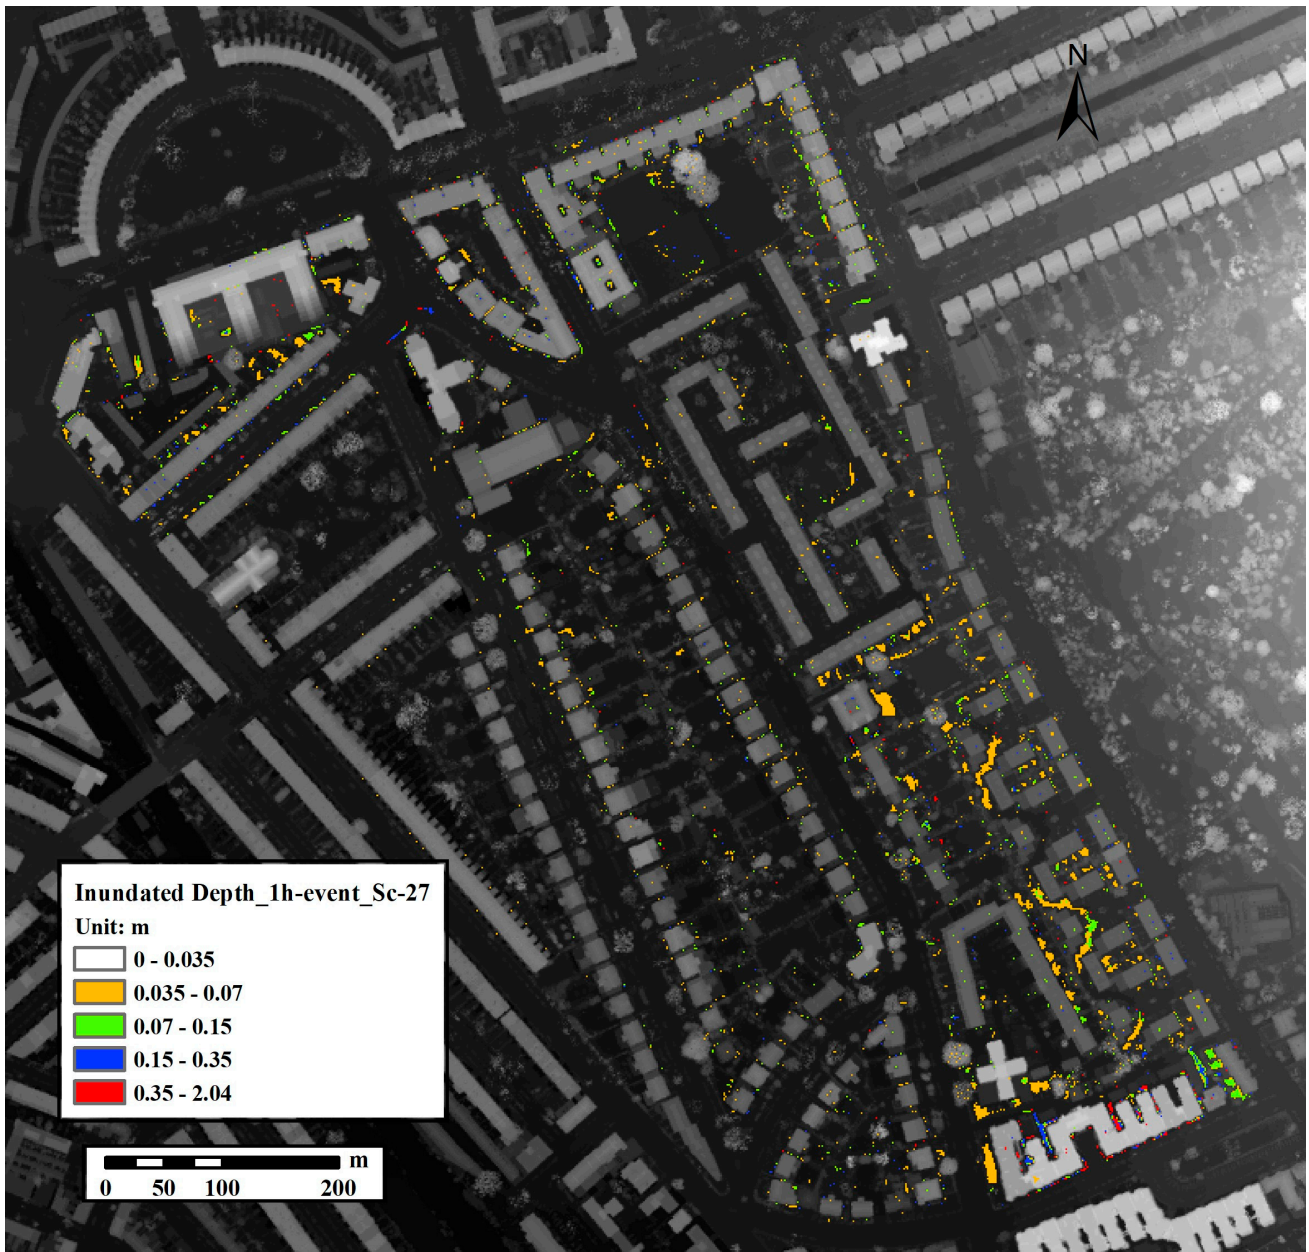

**Fig. S56.** Flood map of scenario 27 at the time of 2h (1-hour rainfall event)

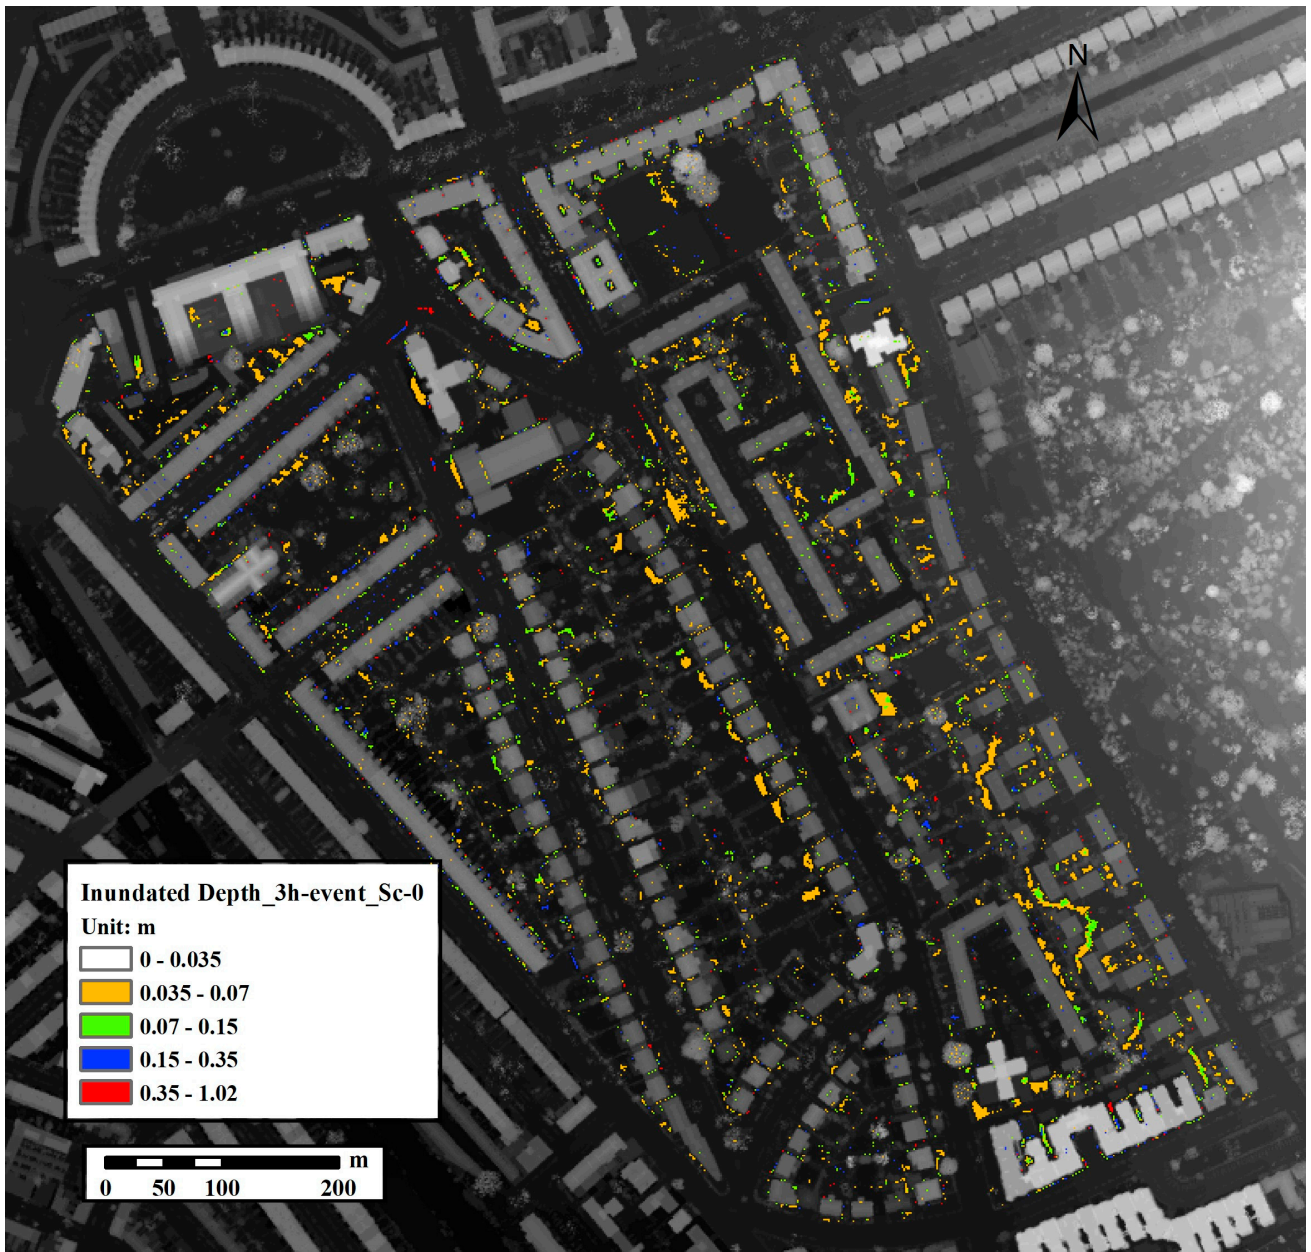

Fig. S57. Flood map of scenario 0 at the time of 4h (3-hour rainfall event)

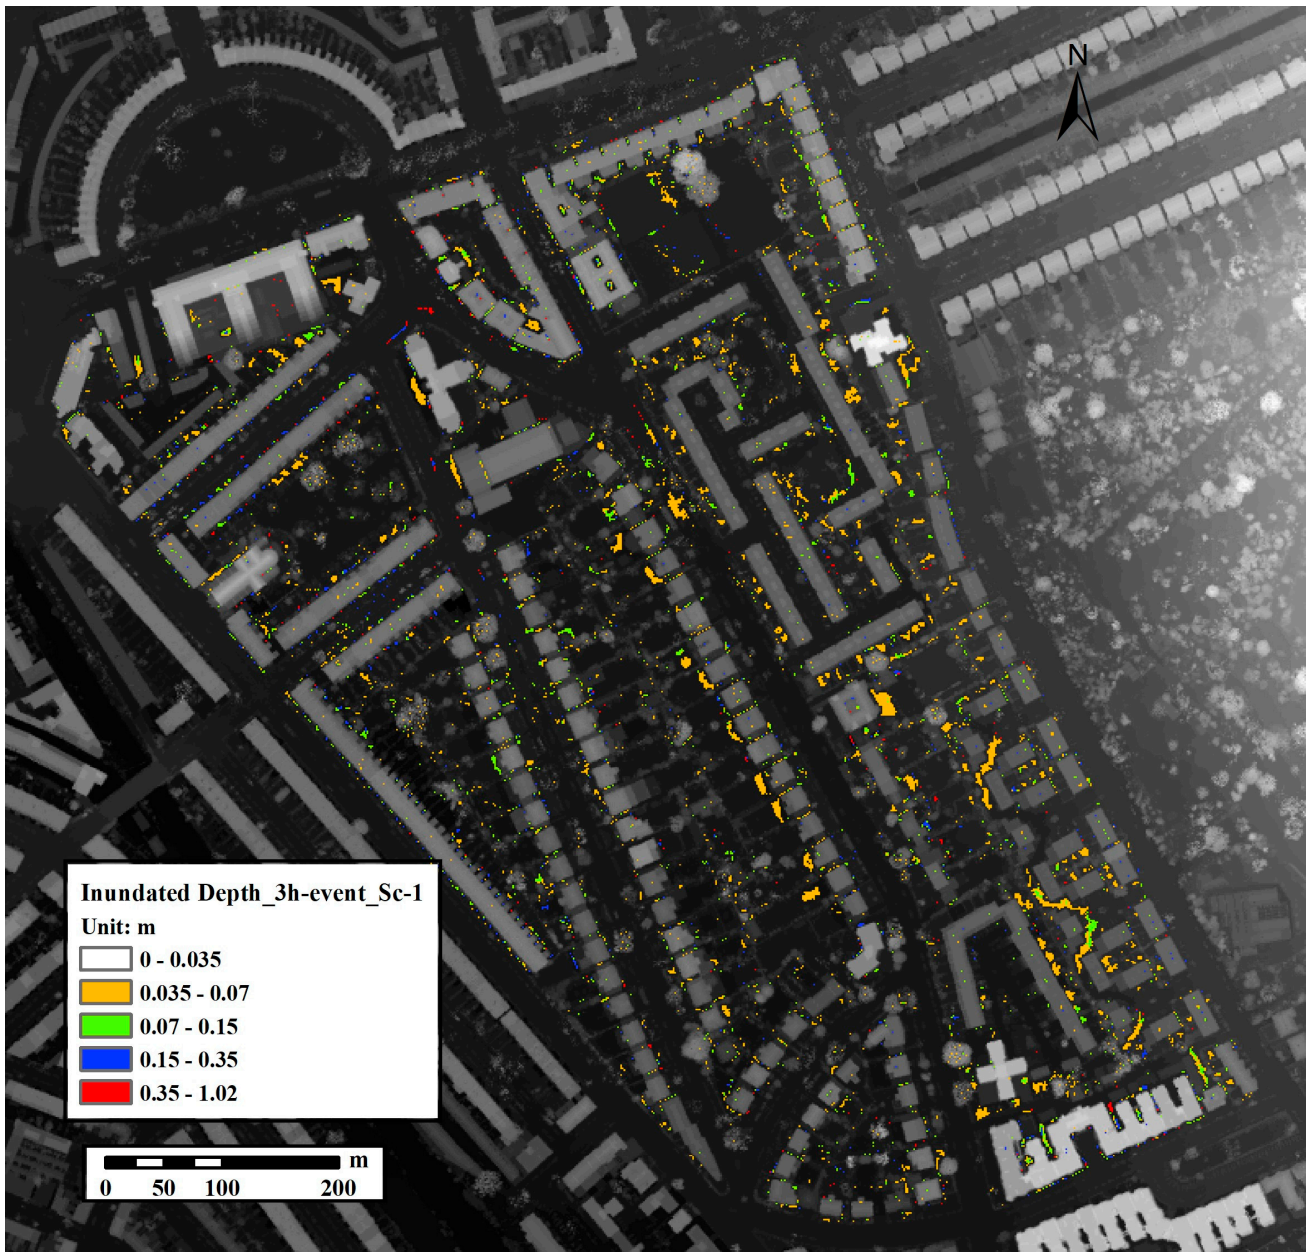

Fig. S58. Flood map of scenario 1 at the time of 4h (3-hour rainfall event)

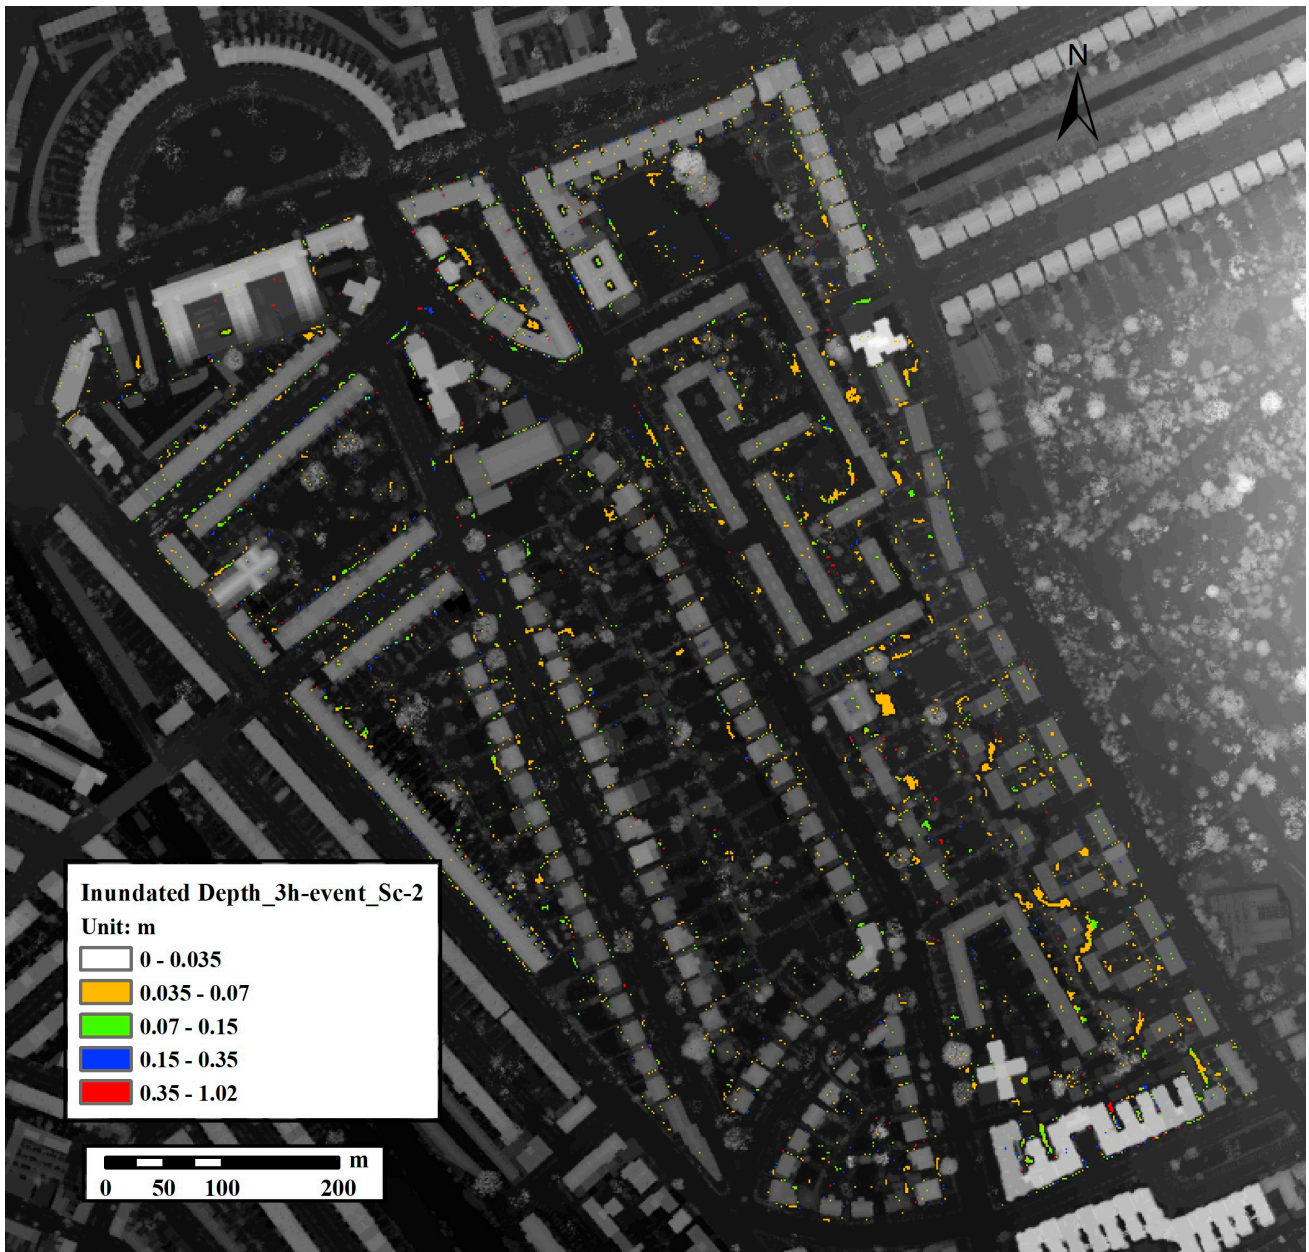

Fig. S59. Flood map of scenario 2 at the time of 4h (3-hour rainfall event)

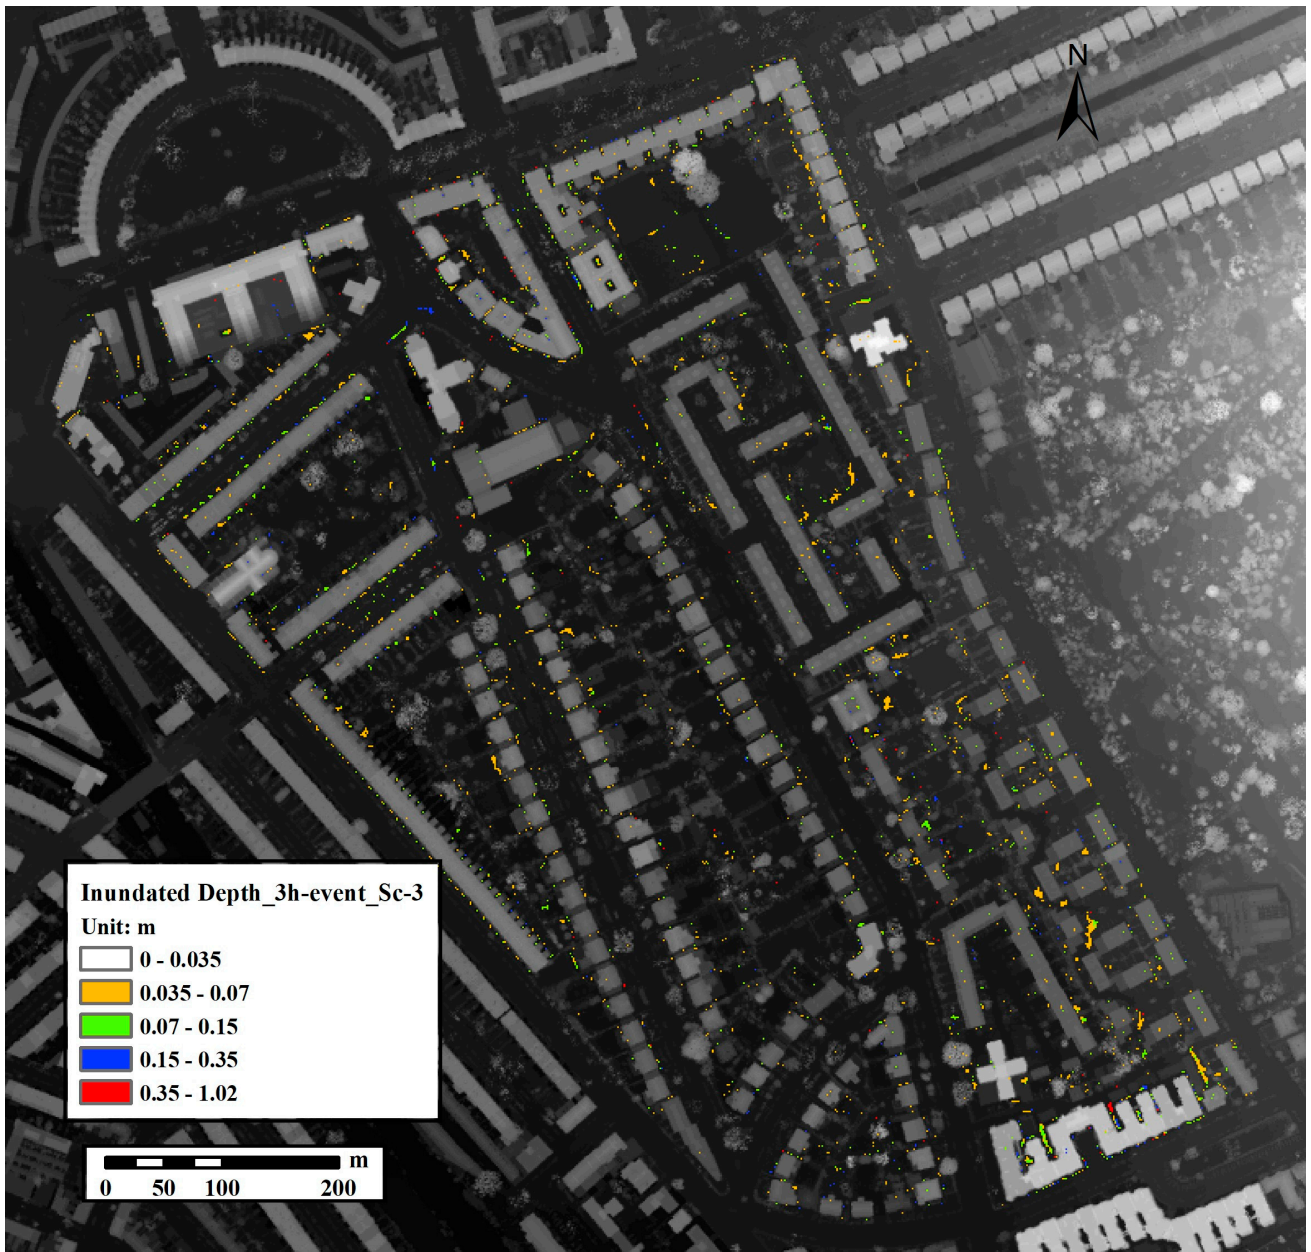

Fig. S60. Flood map of scenario 3 at the time of 4h (3-hour rainfall event)

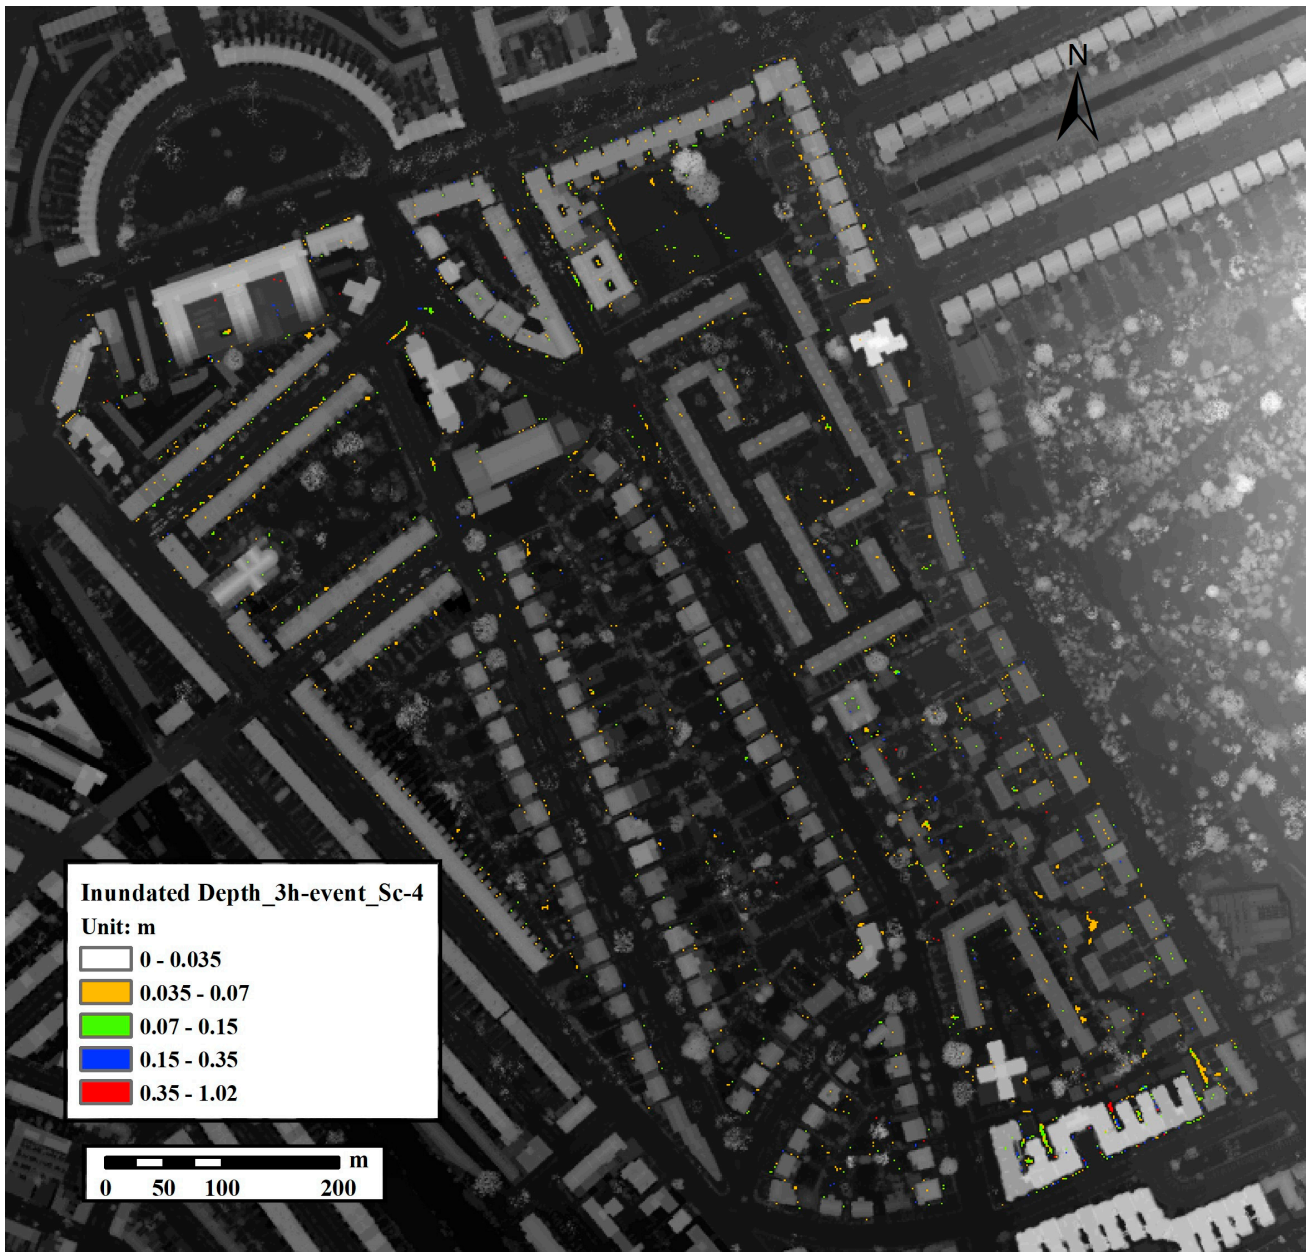

Fig. S61. Flood map of scenario 4 at the time of 4h (3-hour rainfall event)

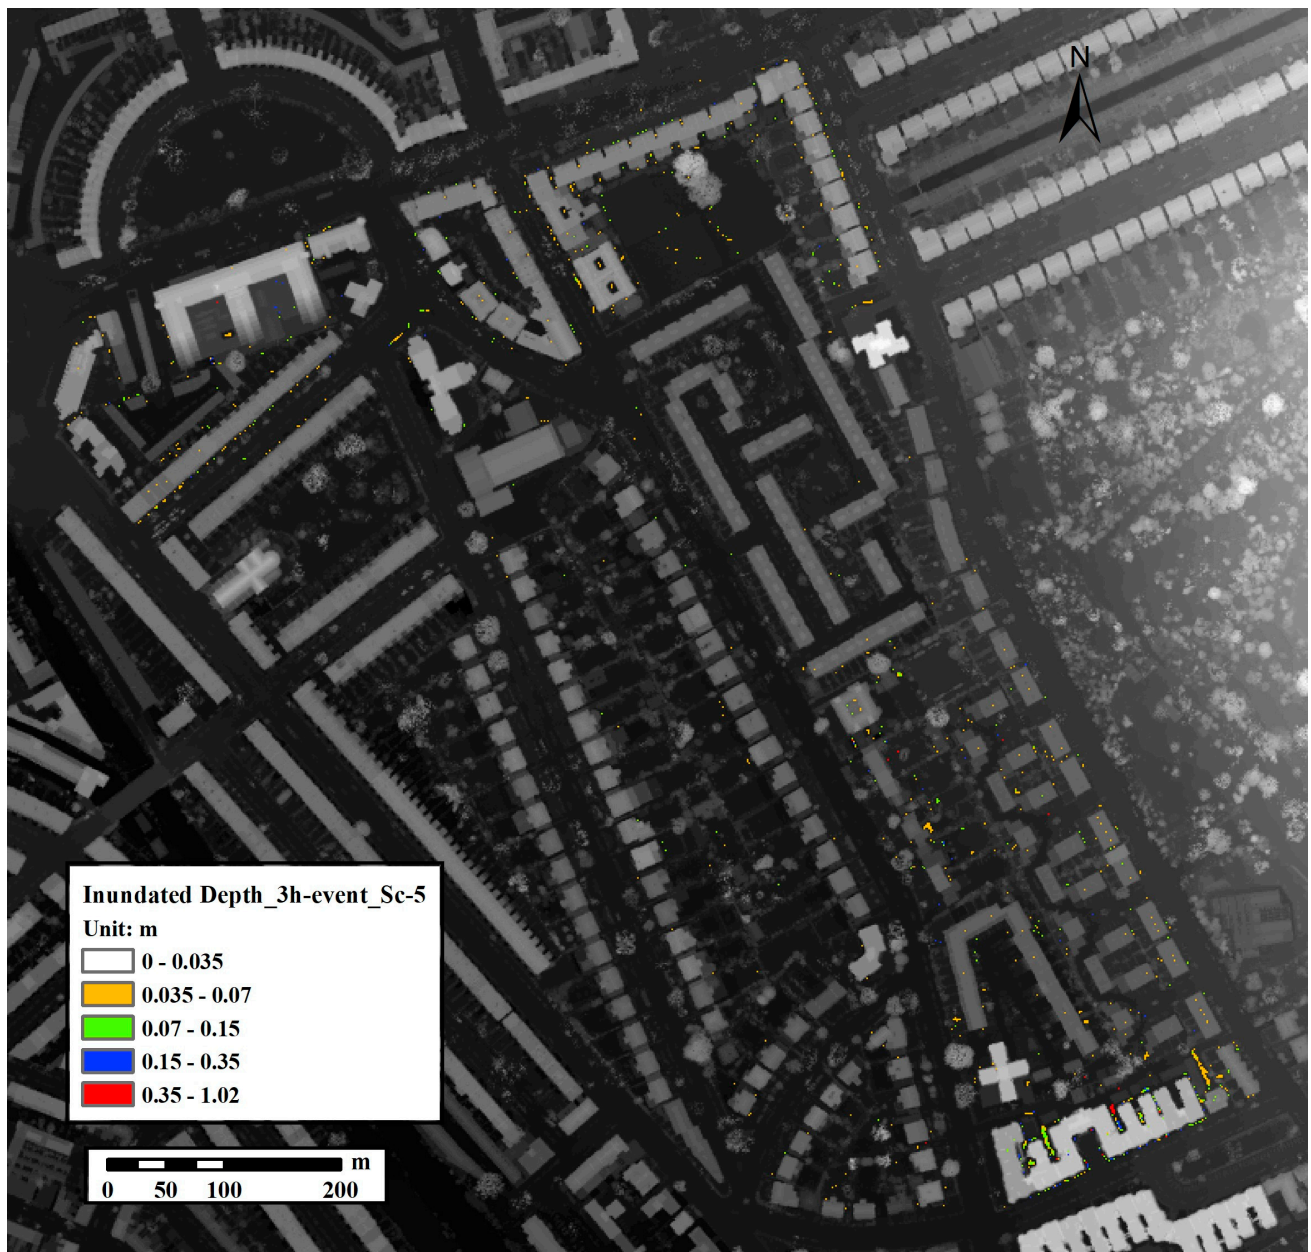

**Fig. S62.** Flood map of scenario 5 at the time of 4h (3-hour rainfall event)

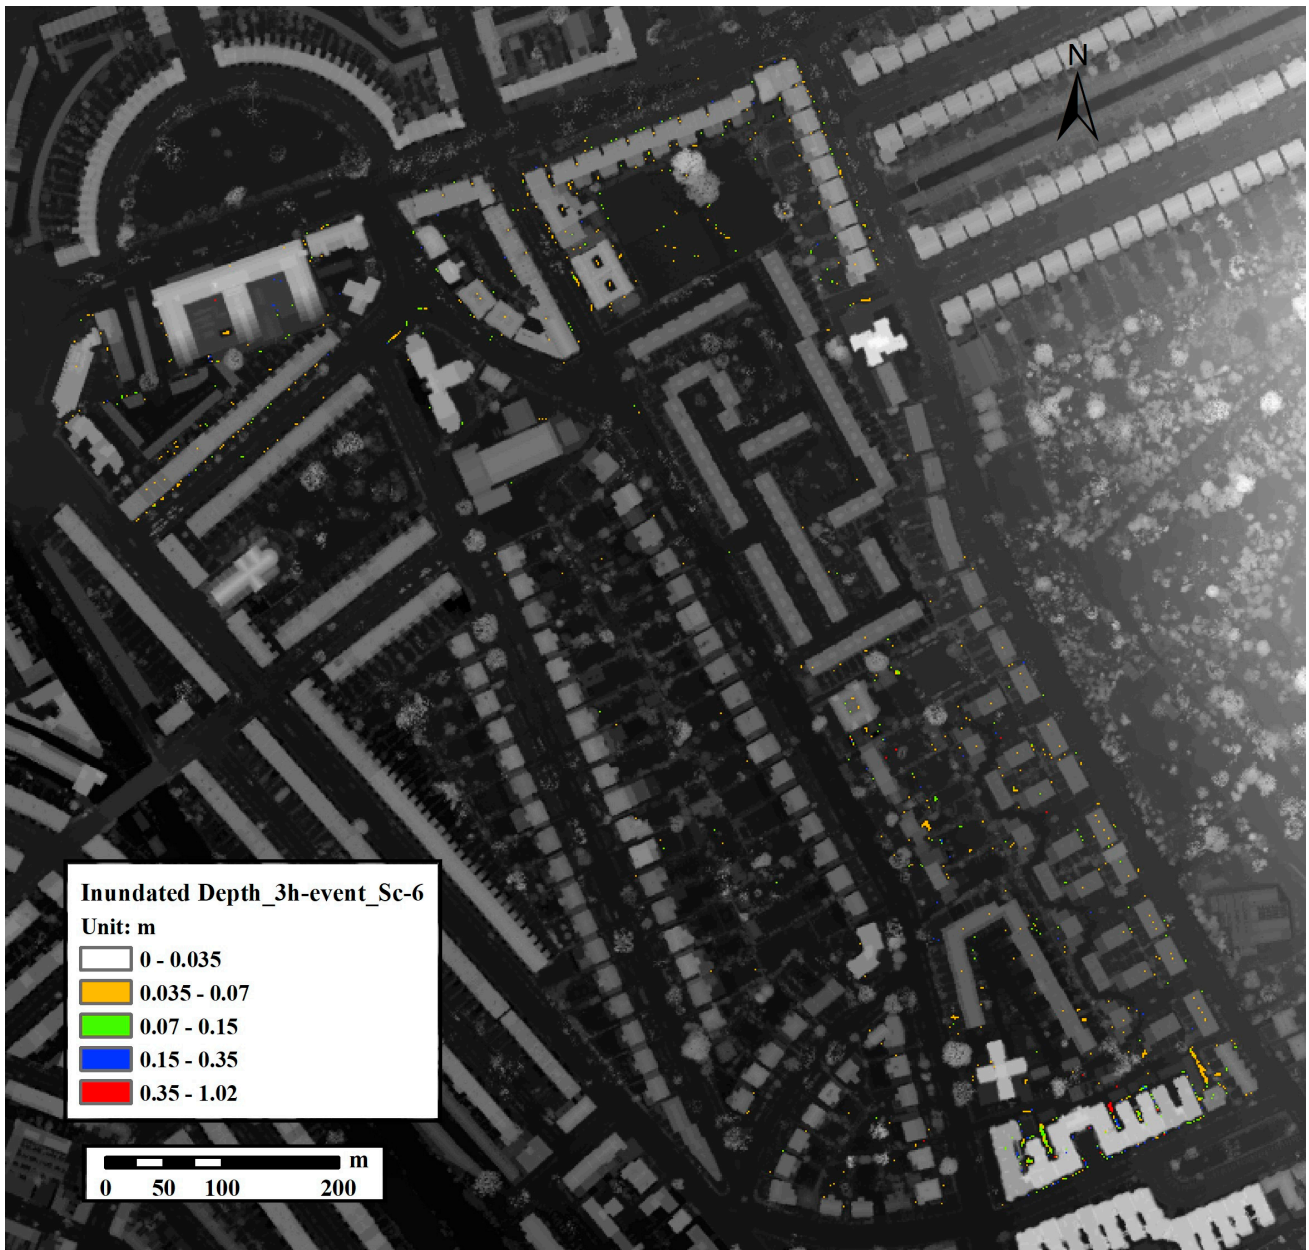

Fig. S63. Flood map of scenario 6 at the time of 4h (3-hour rainfall event)

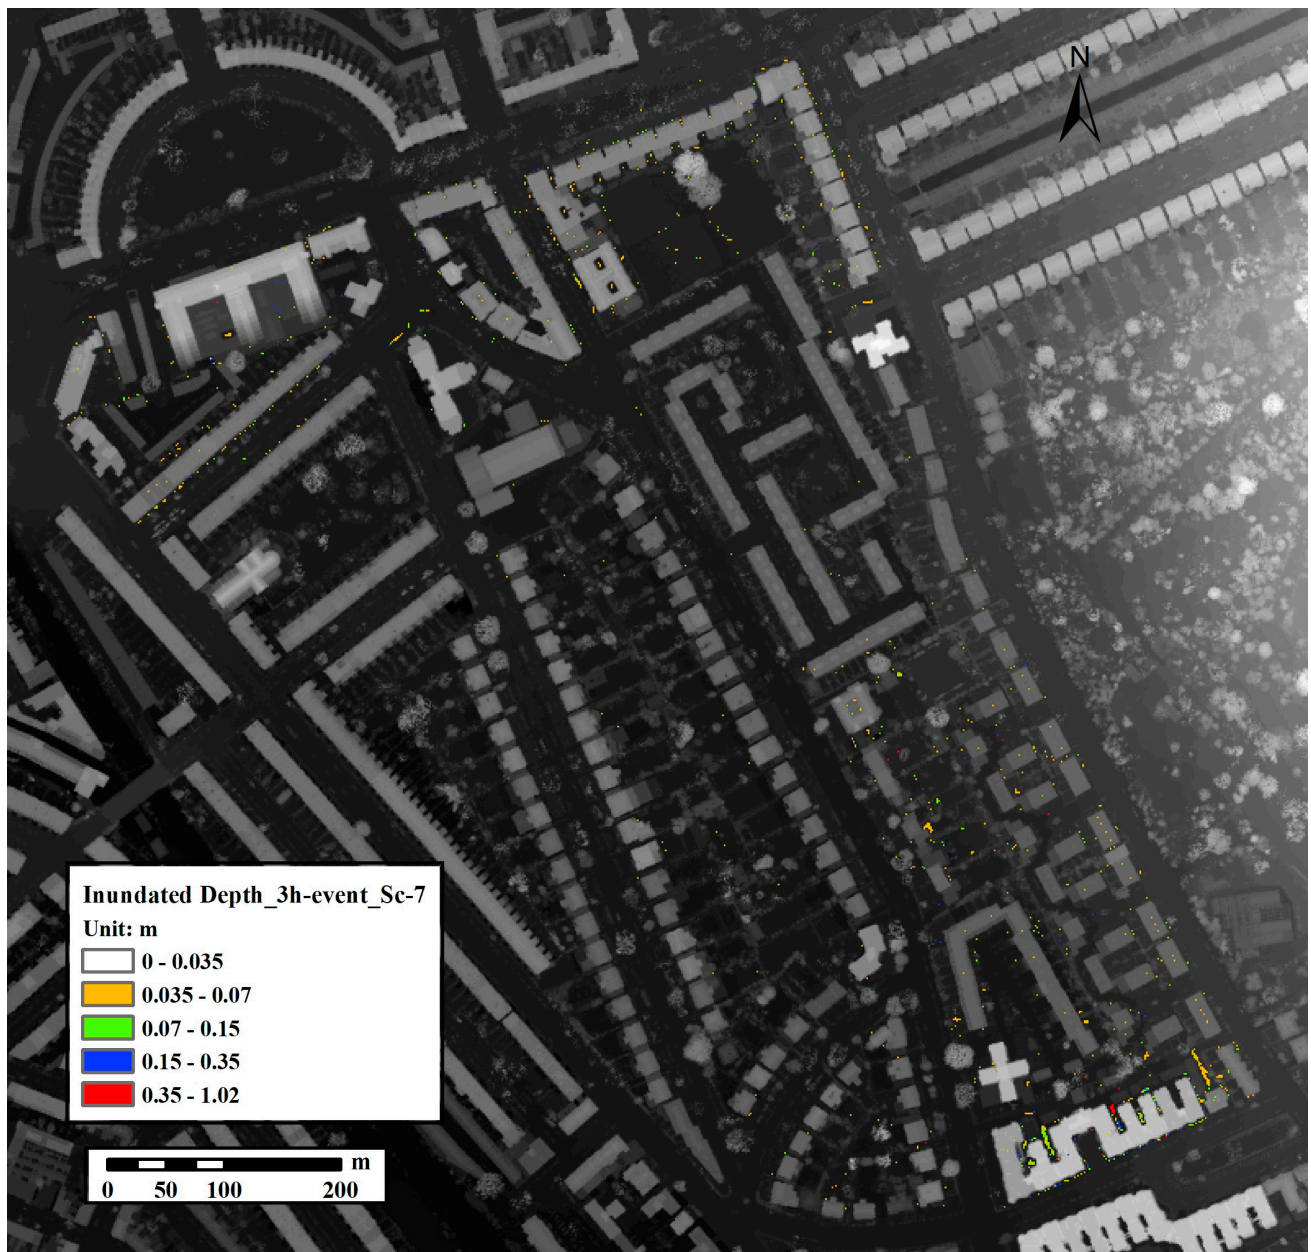

Fig. S64. Flood map of scenario 7 at the time of 4h (3-hour rainfall event)

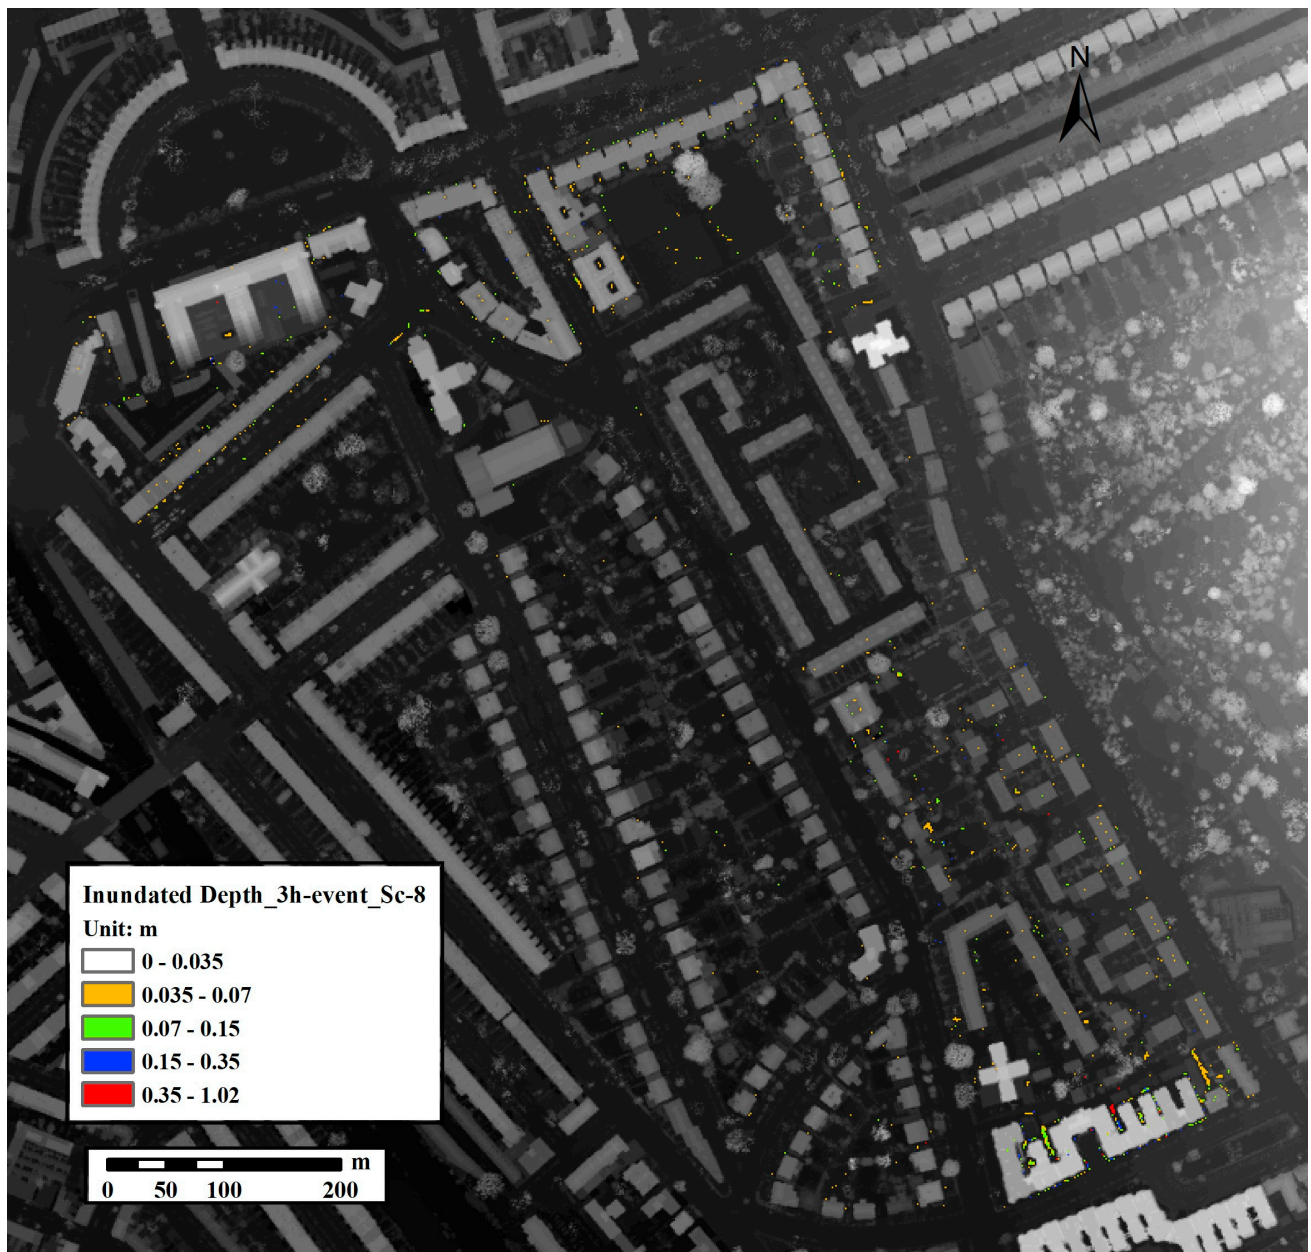

Fig. S65. Flood map of scenario 8 at the time of 4h (3-hour rainfall event)

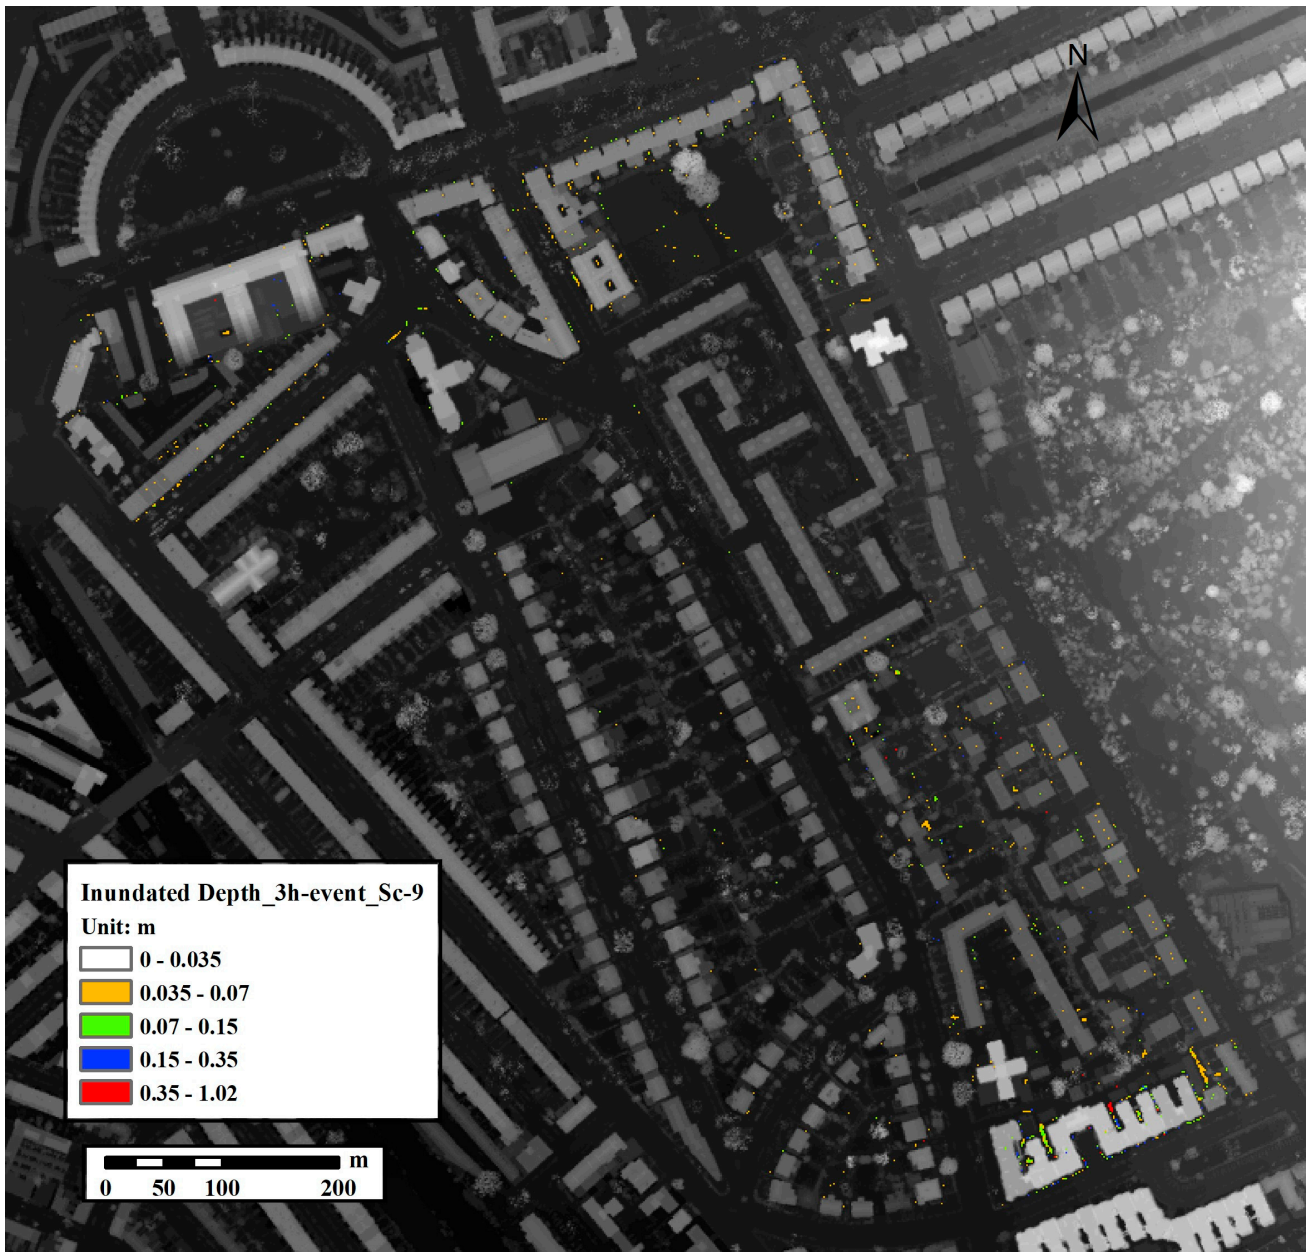

Fig. S66. Flood map of scenario 9 at the time of 4h (3-hour rainfall event)

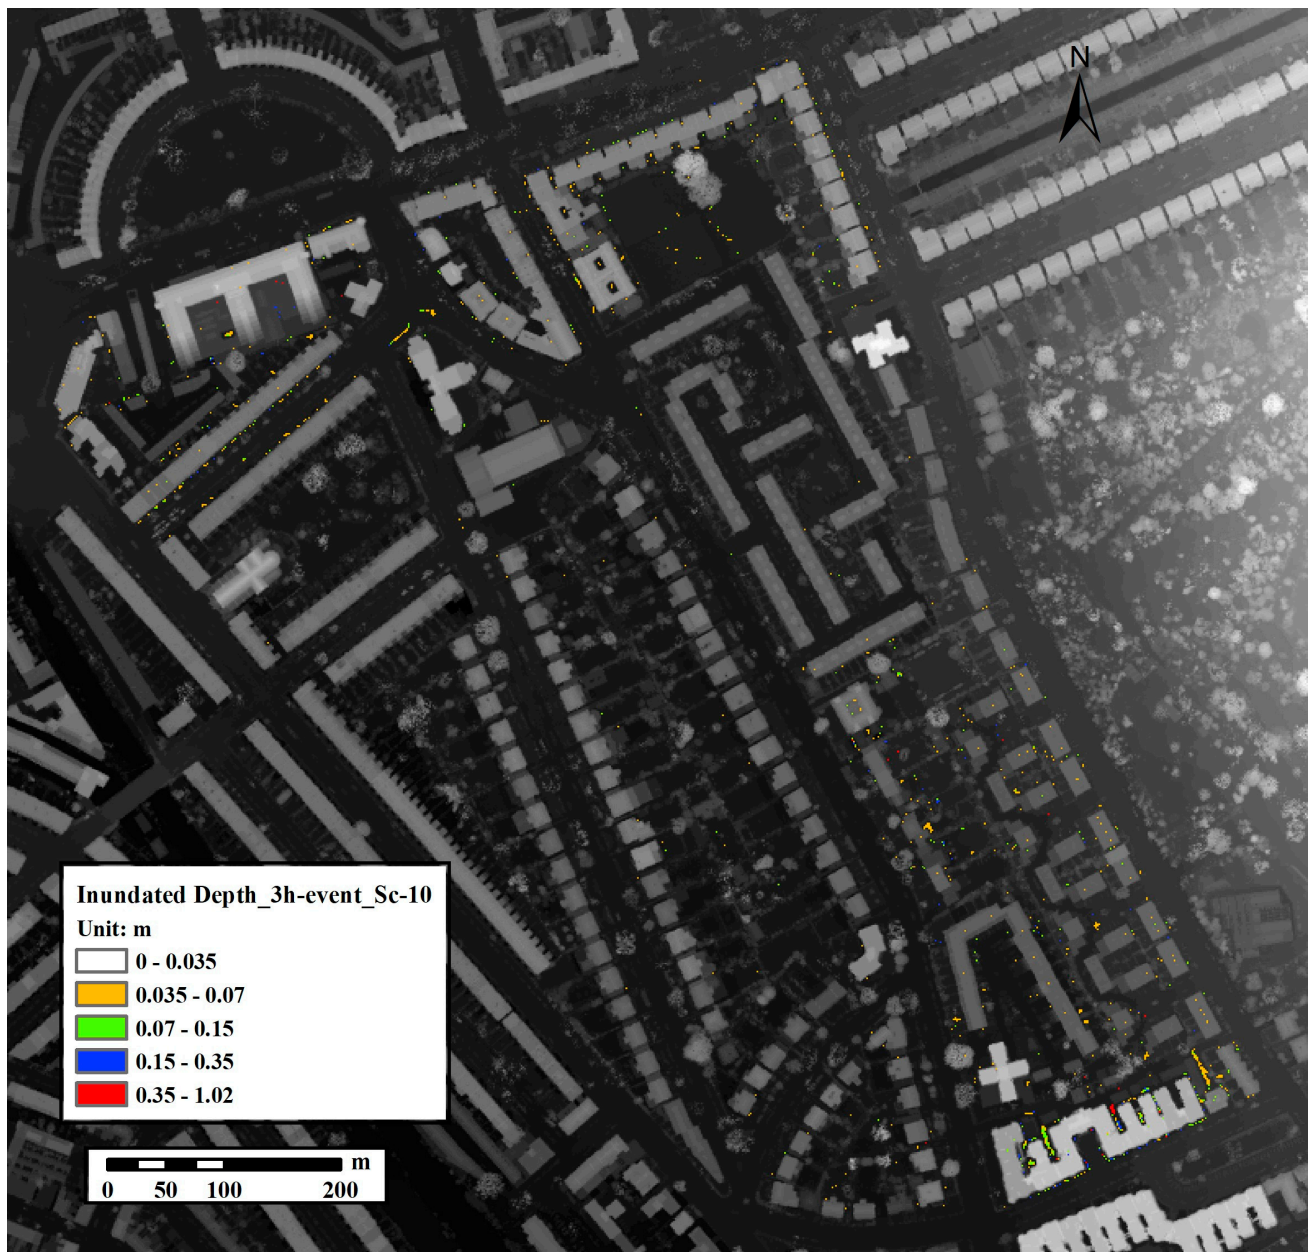

**Fig. S67.** Flood map of scenario 10 at the time of 4h (3-hour rainfall event)

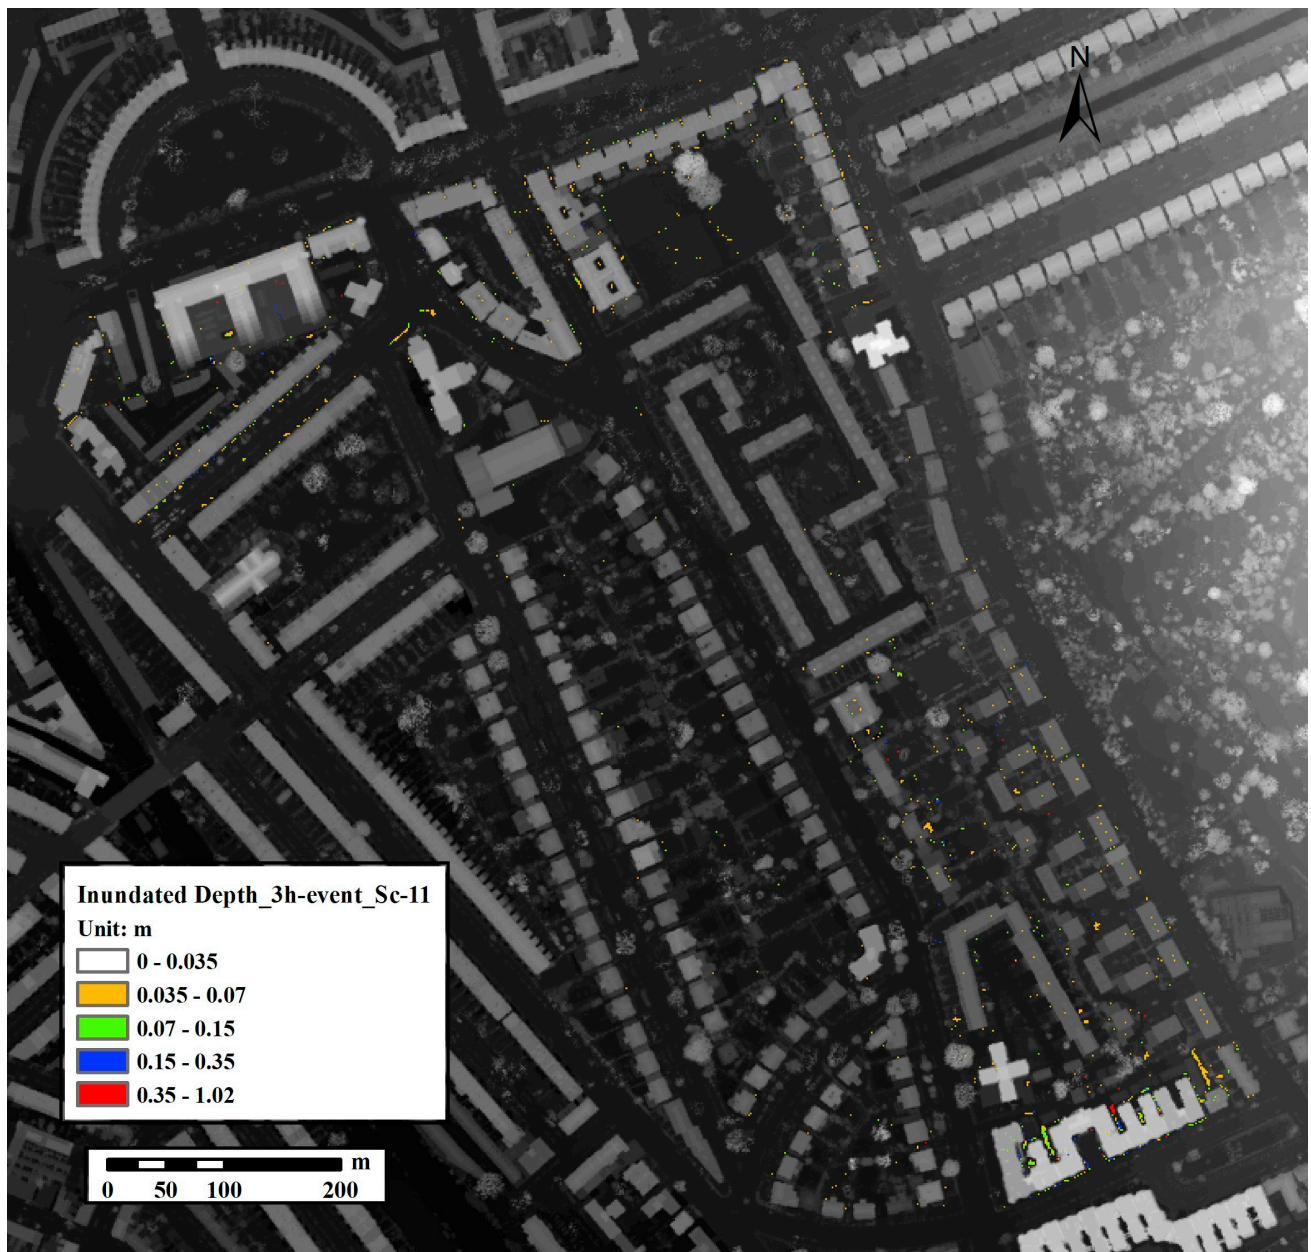

**Fig. S68.** Flood map of scenario 11 at the time of 4h (3-hour rainfall event)

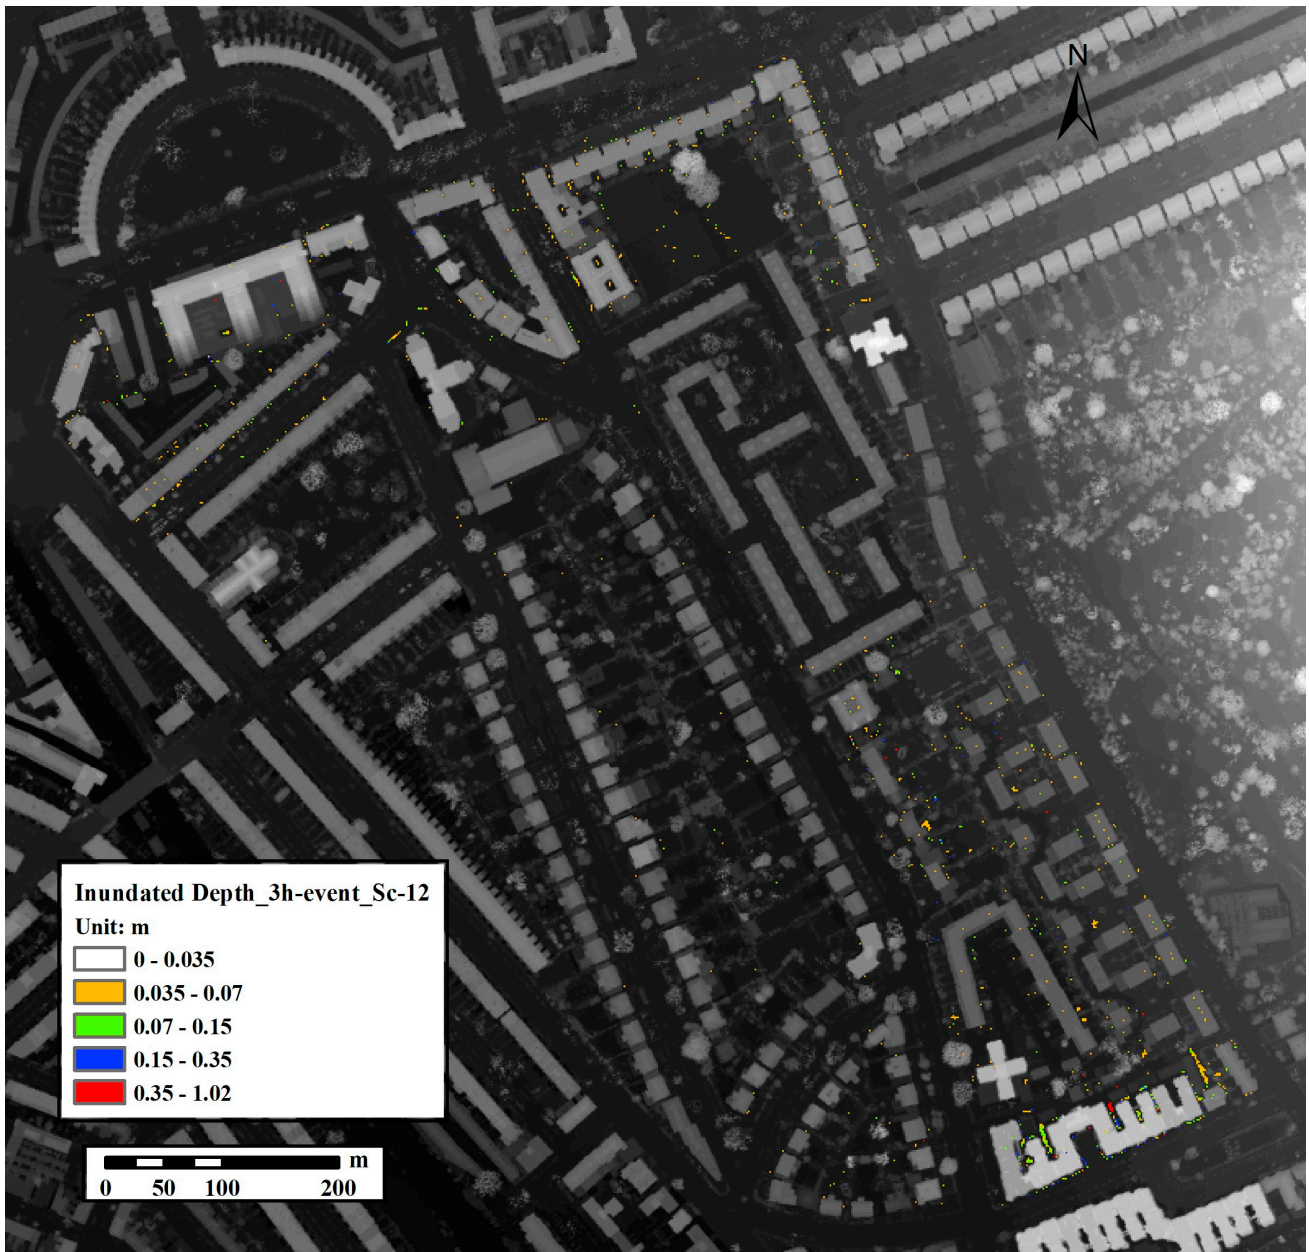

**Fig. S69.** Flood map of scenario 12 at the time of 4h (3-hour rainfall event)

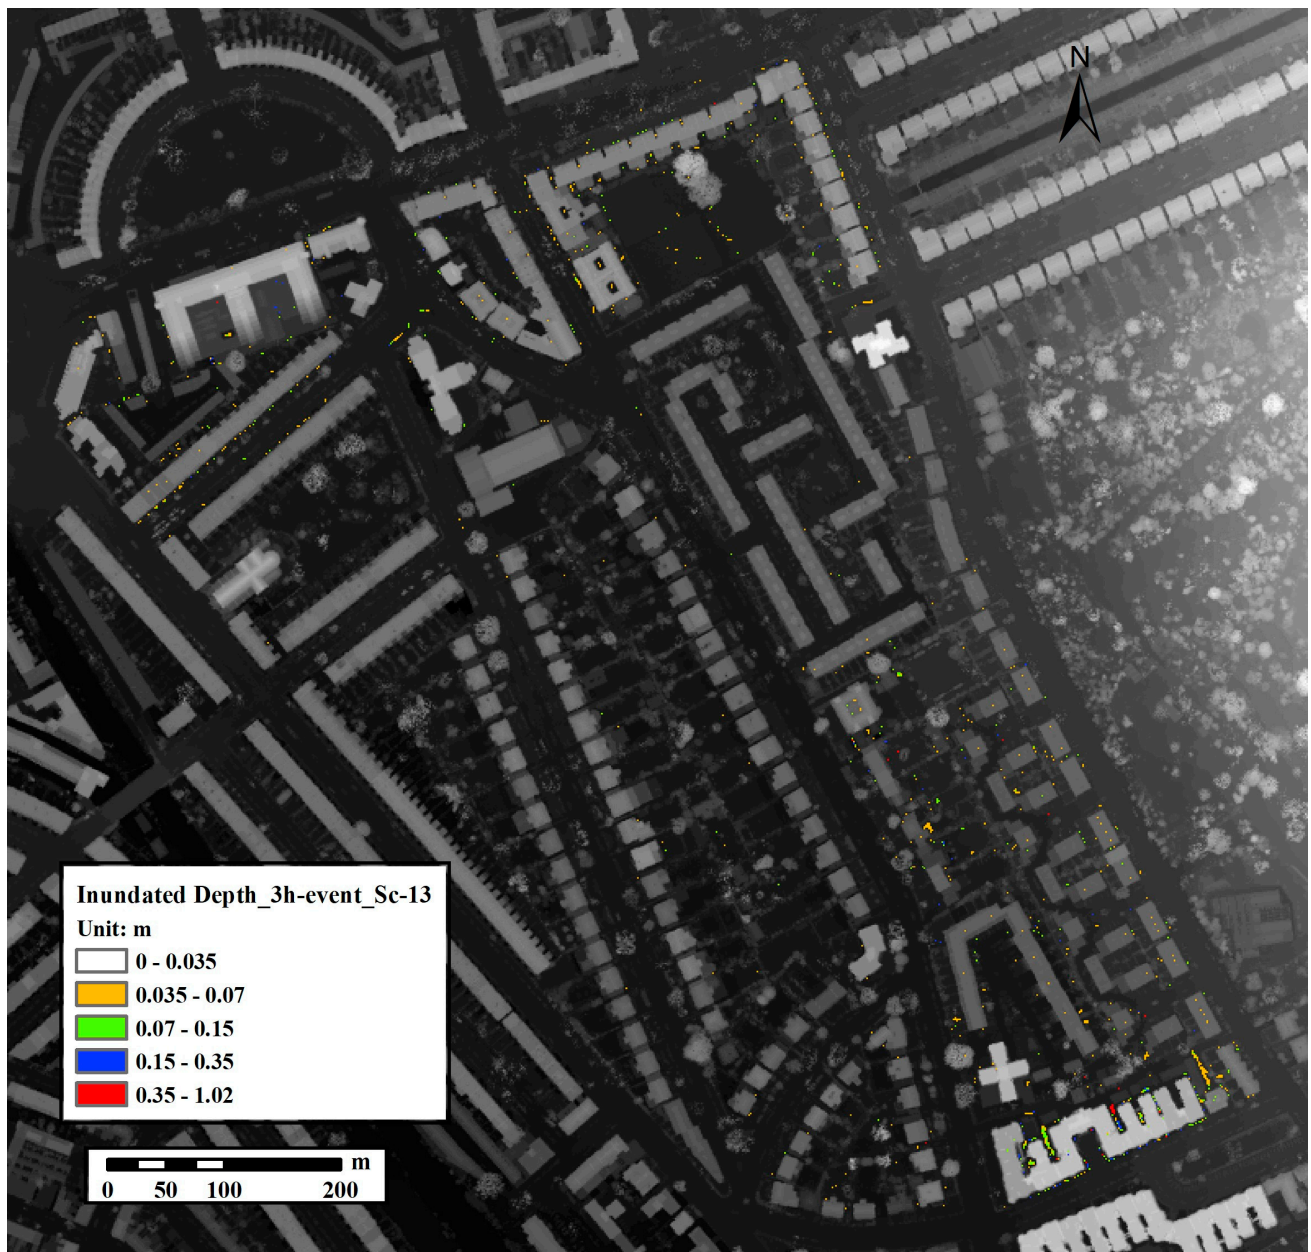

**Fig. S70.** Flood map of scenario 13 at the time of 4h (3-hour rainfall event)

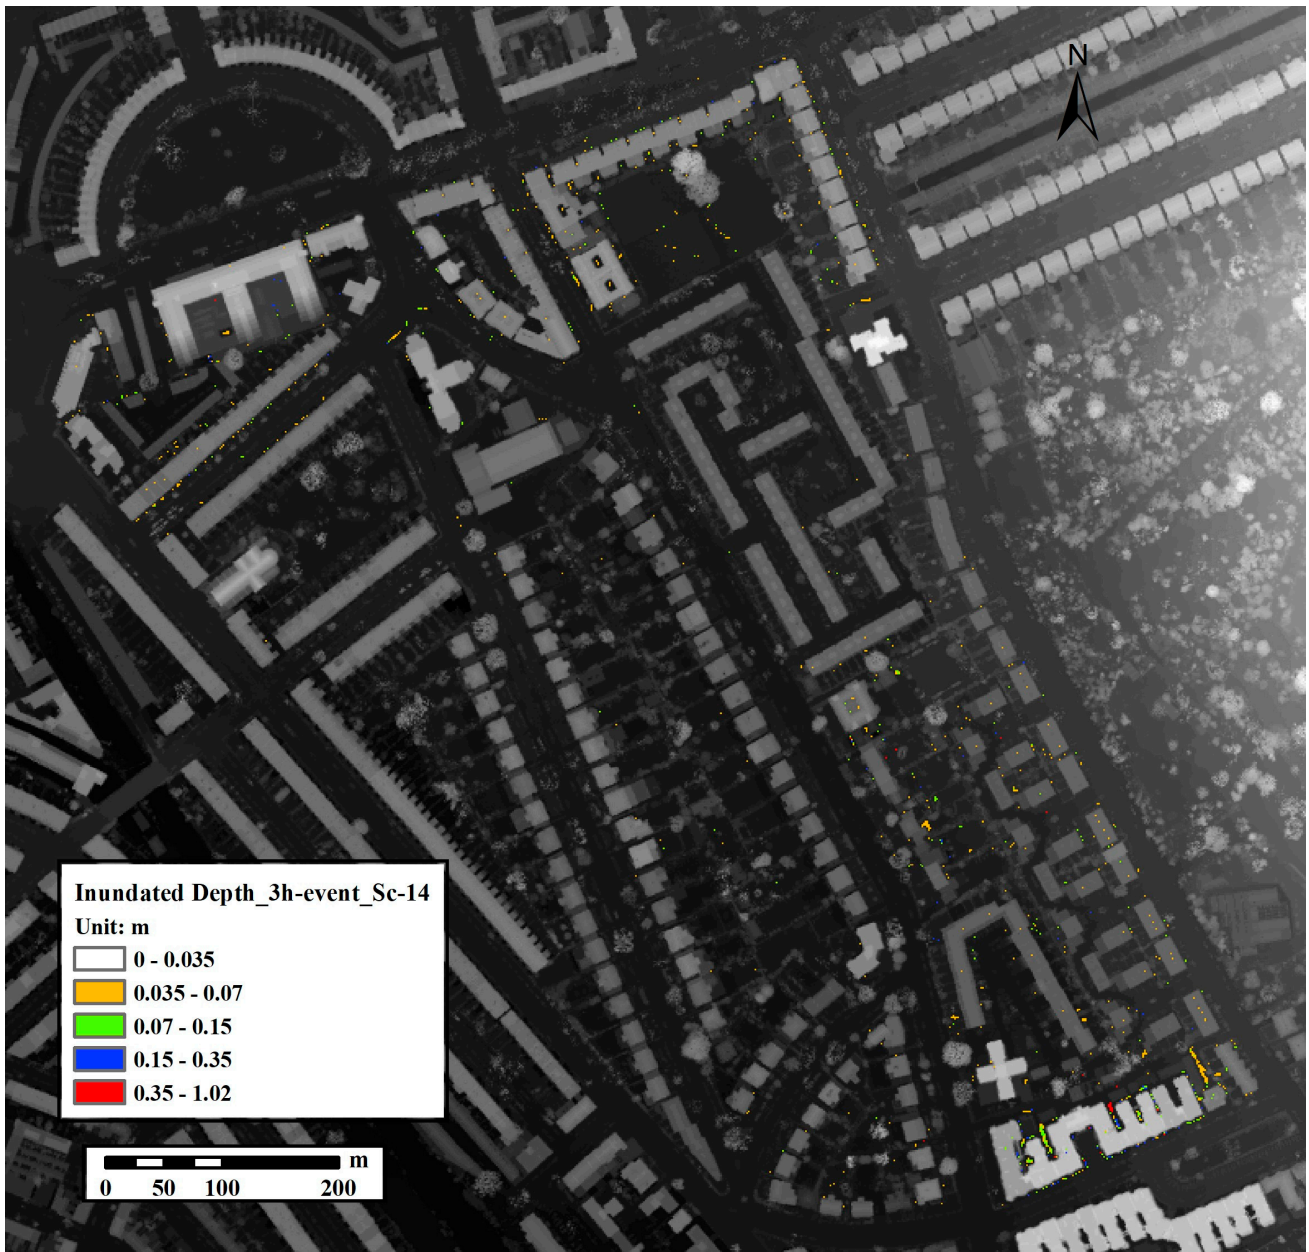

**Fig. S71.** Flood map of scenario 14 at the time of 4h (3-hour rainfall event)

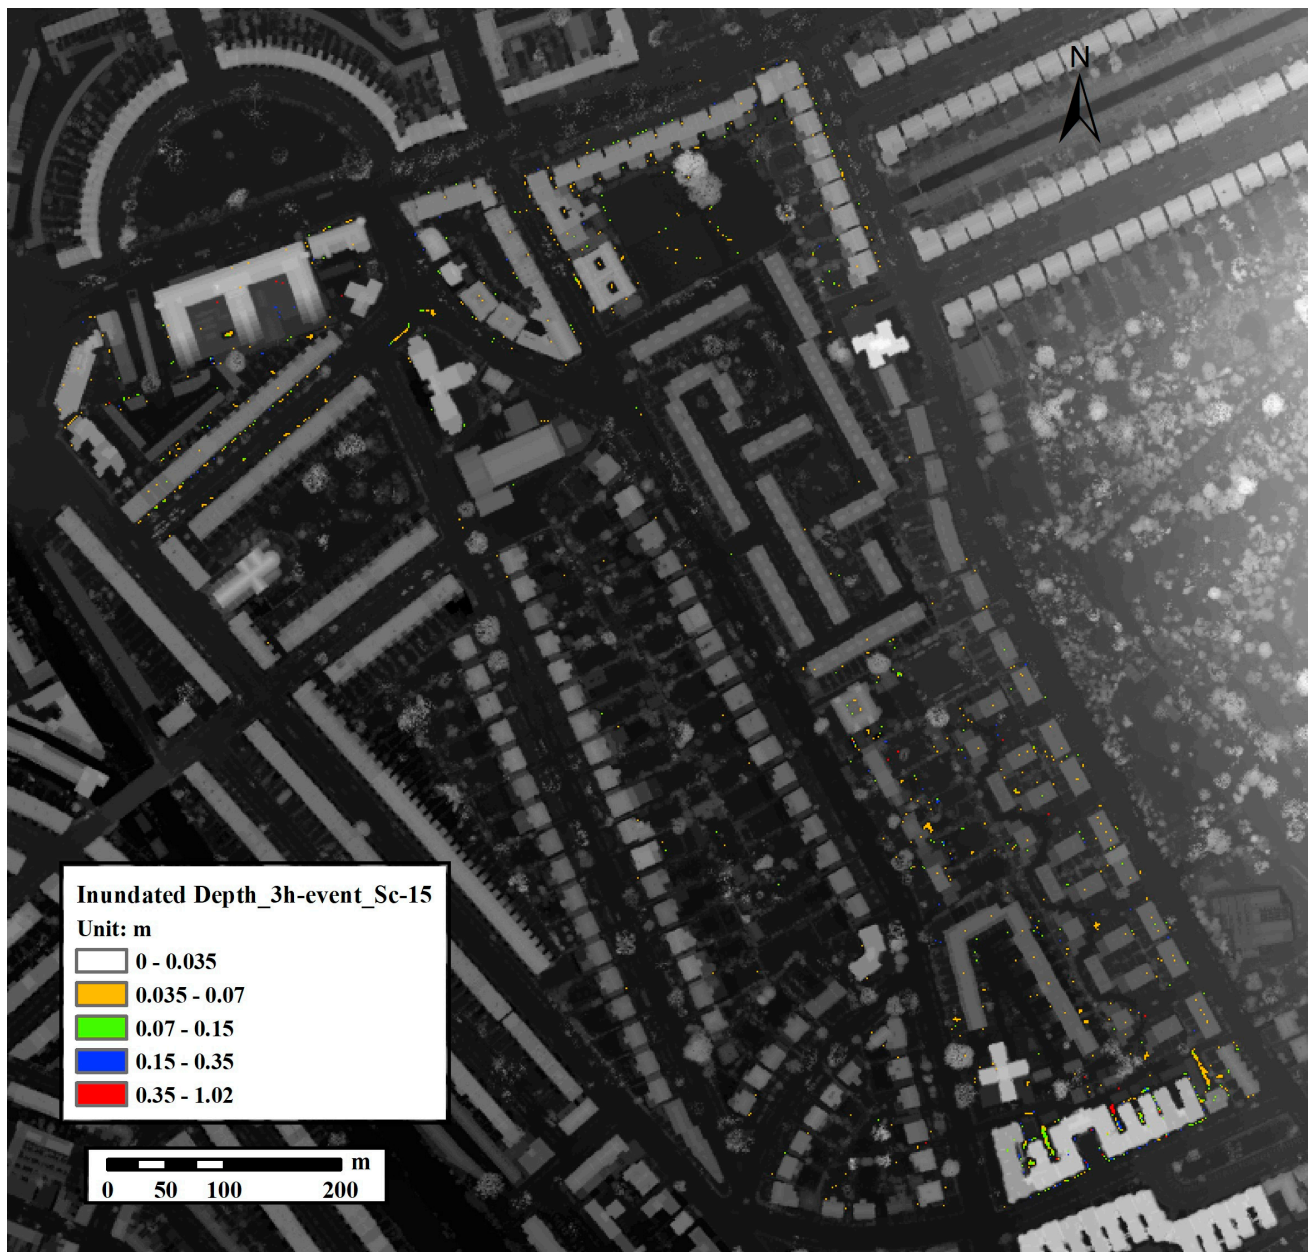

**Fig. S72.** Flood map of scenario 15 at the time of 4h (3-hour rainfall event)

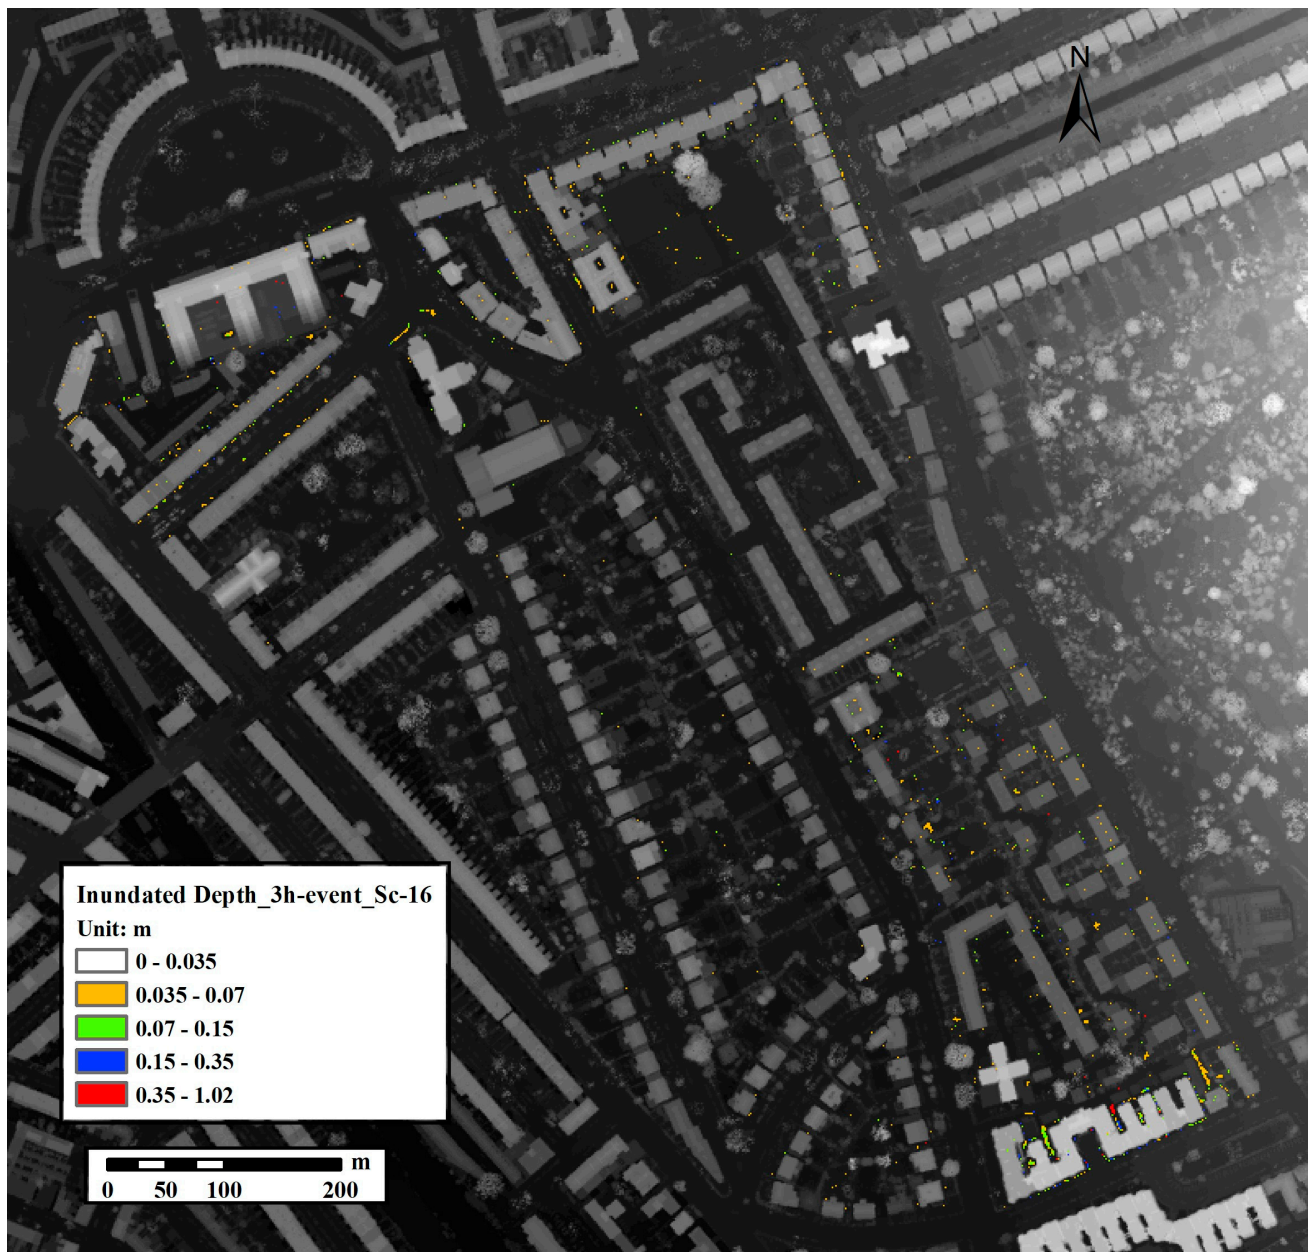

**Fig. S73.** Flood map of scenario 16 at the time of 4h (3-hour rainfall event)

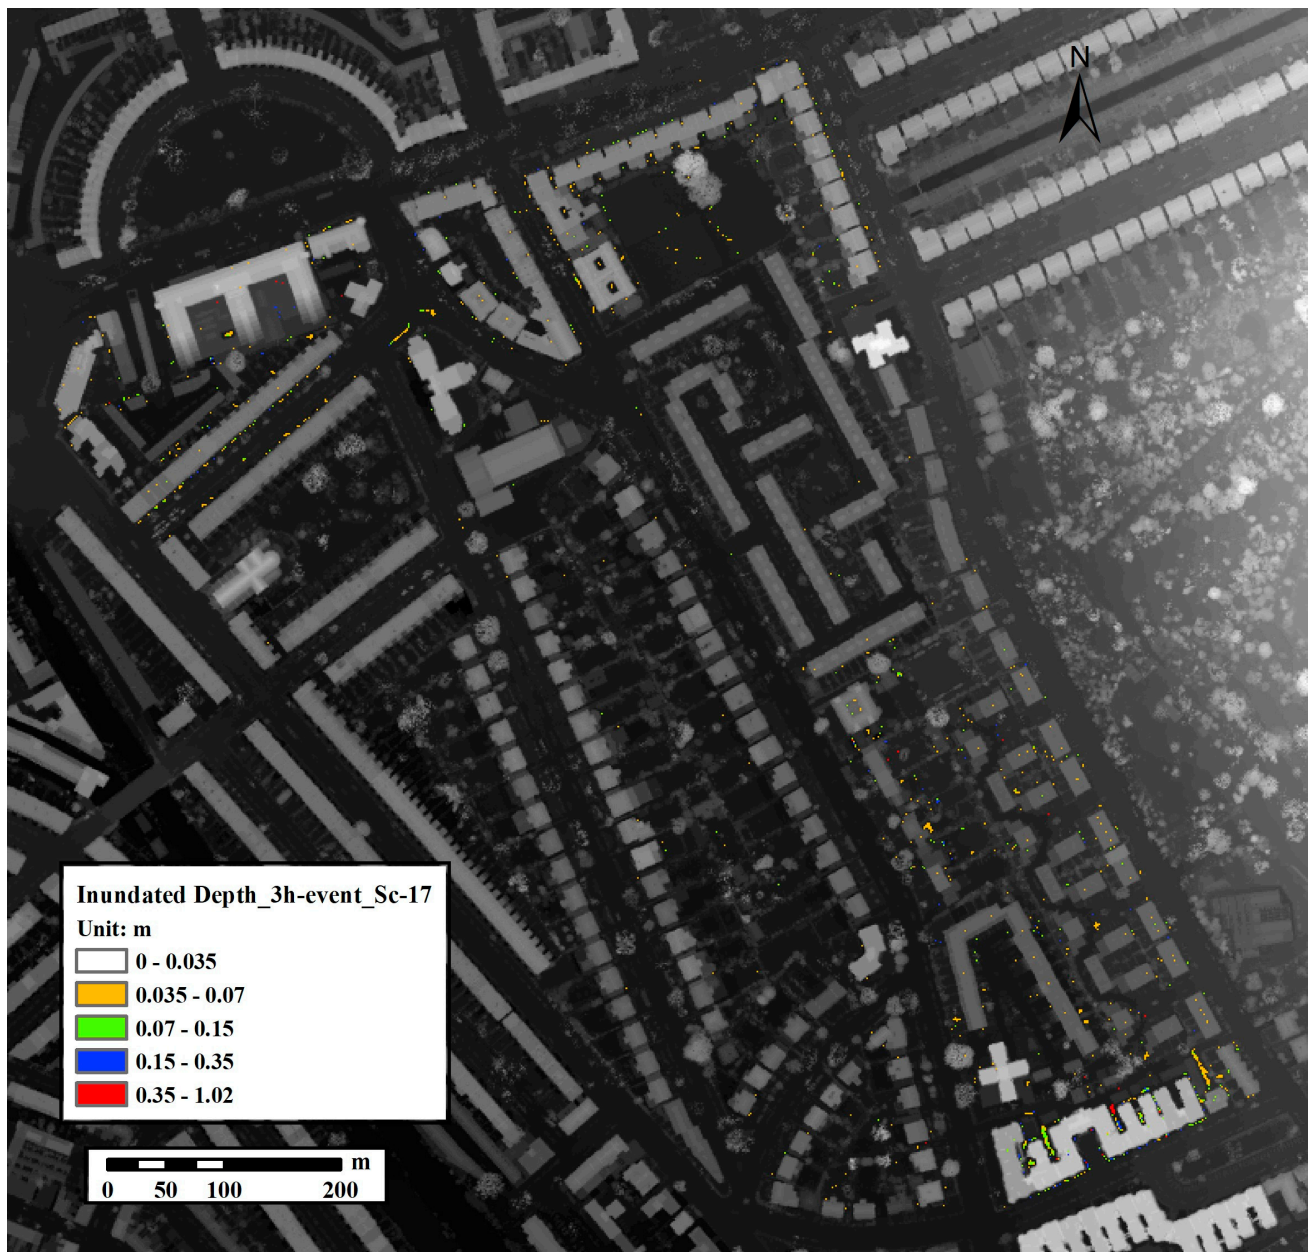

**Fig. S74.** Flood map of scenario 17 at the time of 4h (3-hour rainfall event)

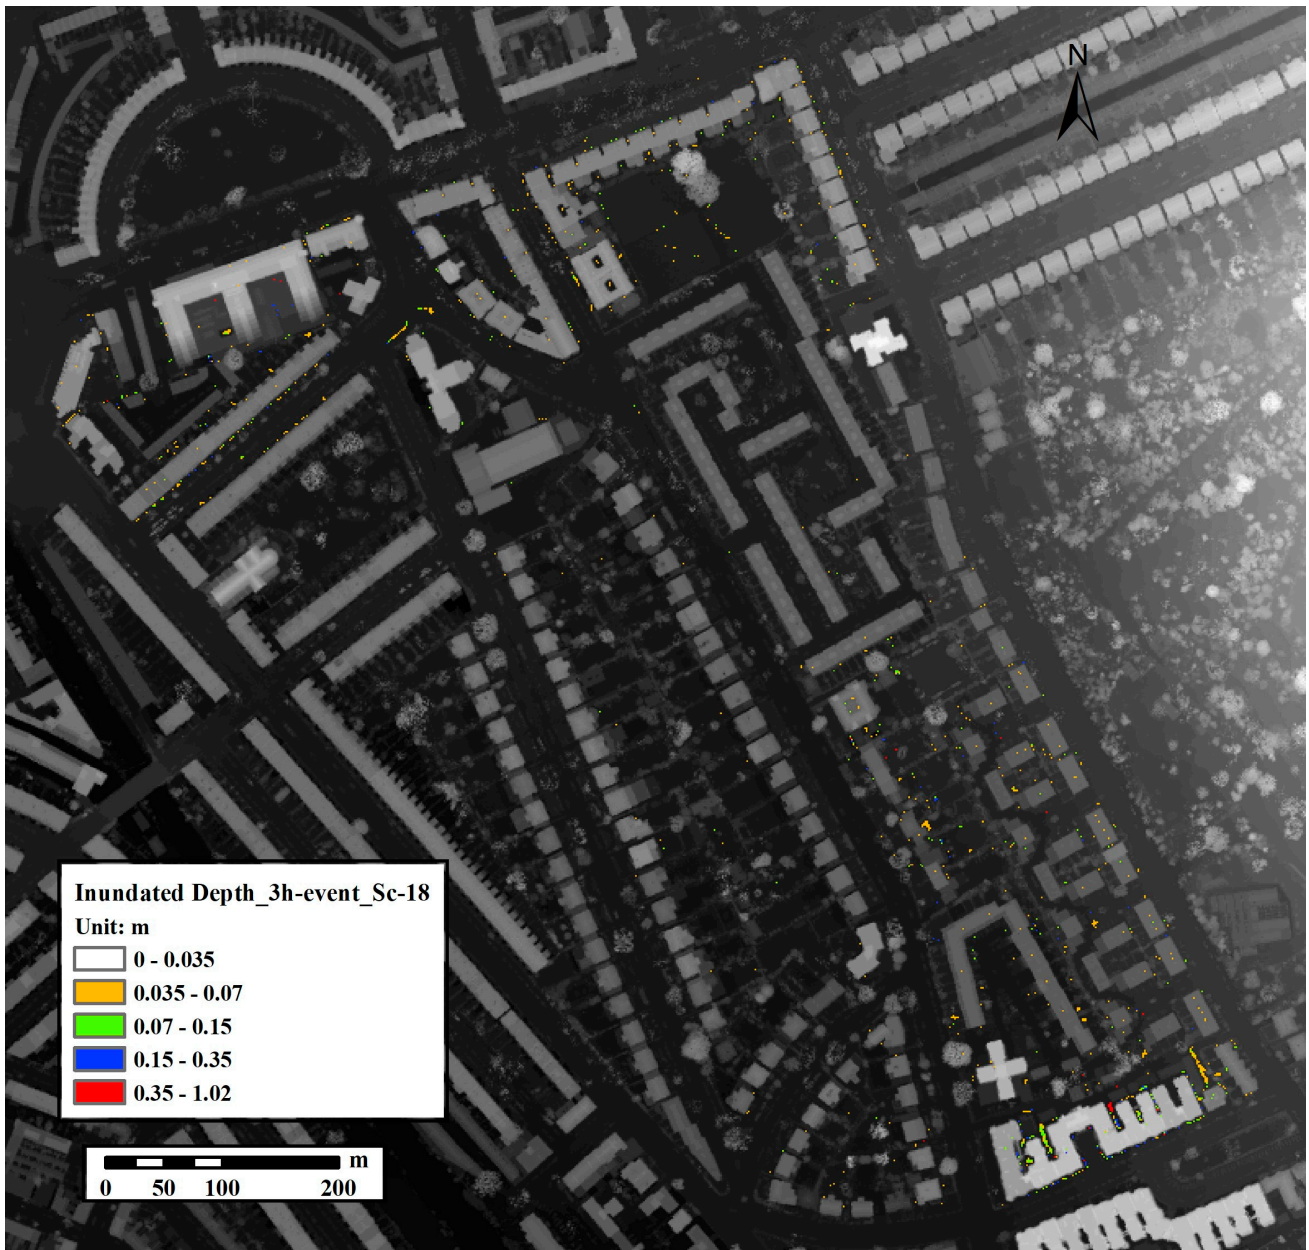

**Fig. S75.** Flood map of scenario 18 at the time of 4h (3-hour rainfall event)

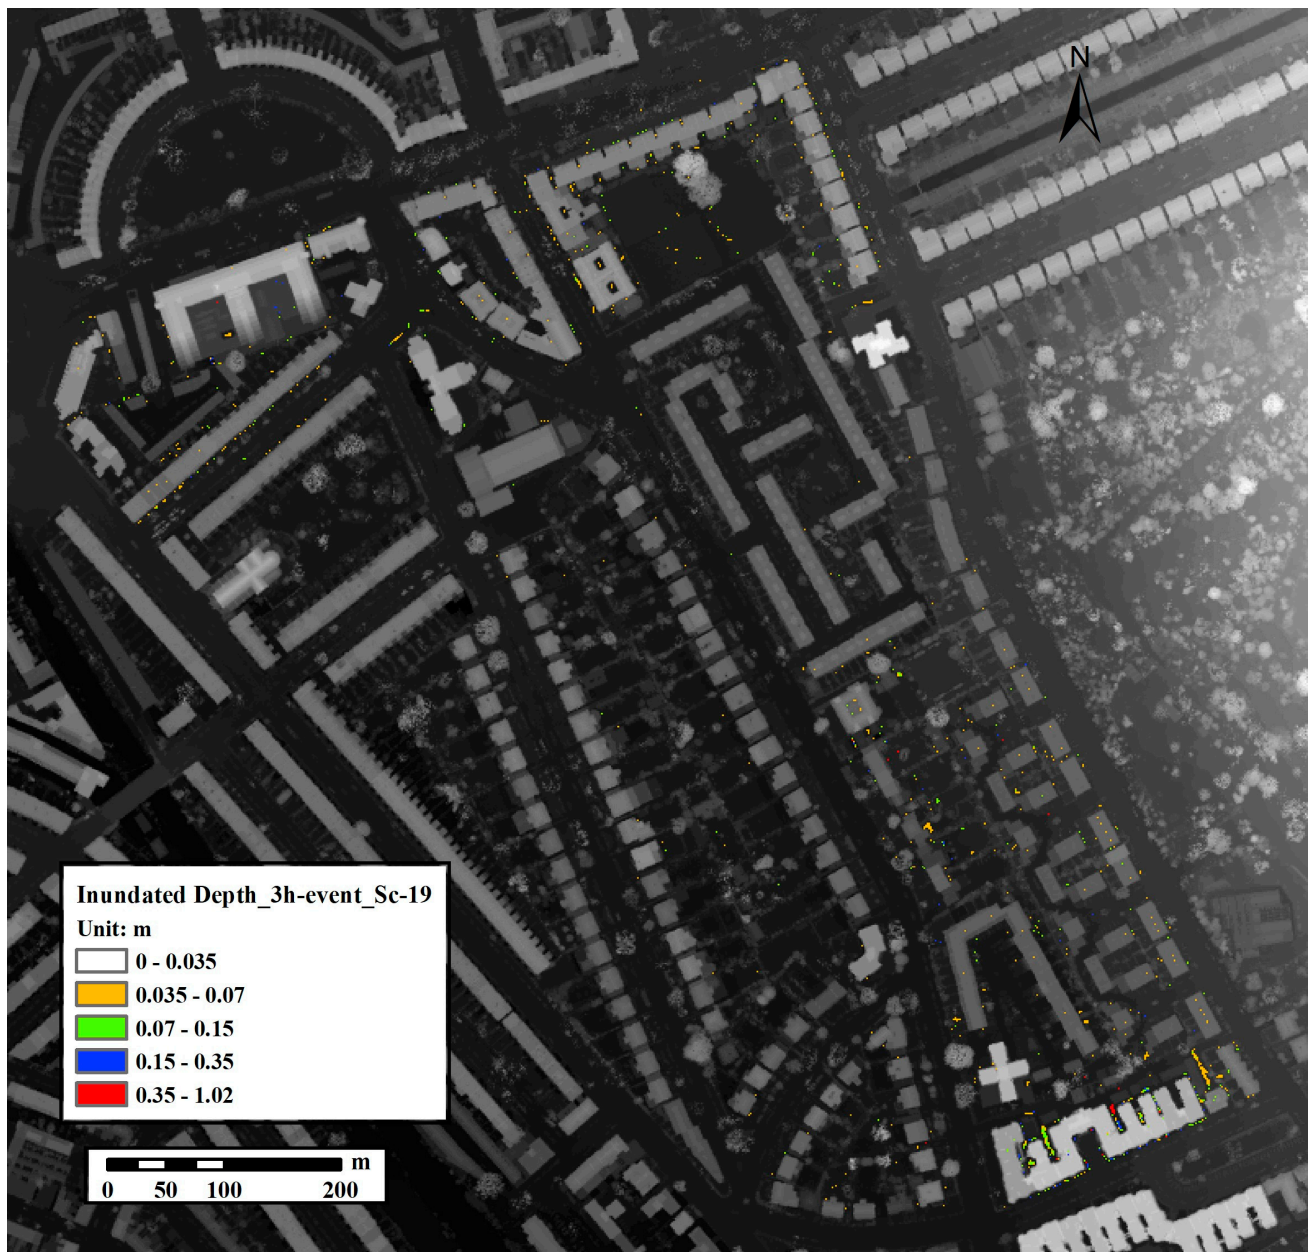

**Fig. S76.** Flood map of scenario 19 at the time of 4h (3-hour rainfall event)

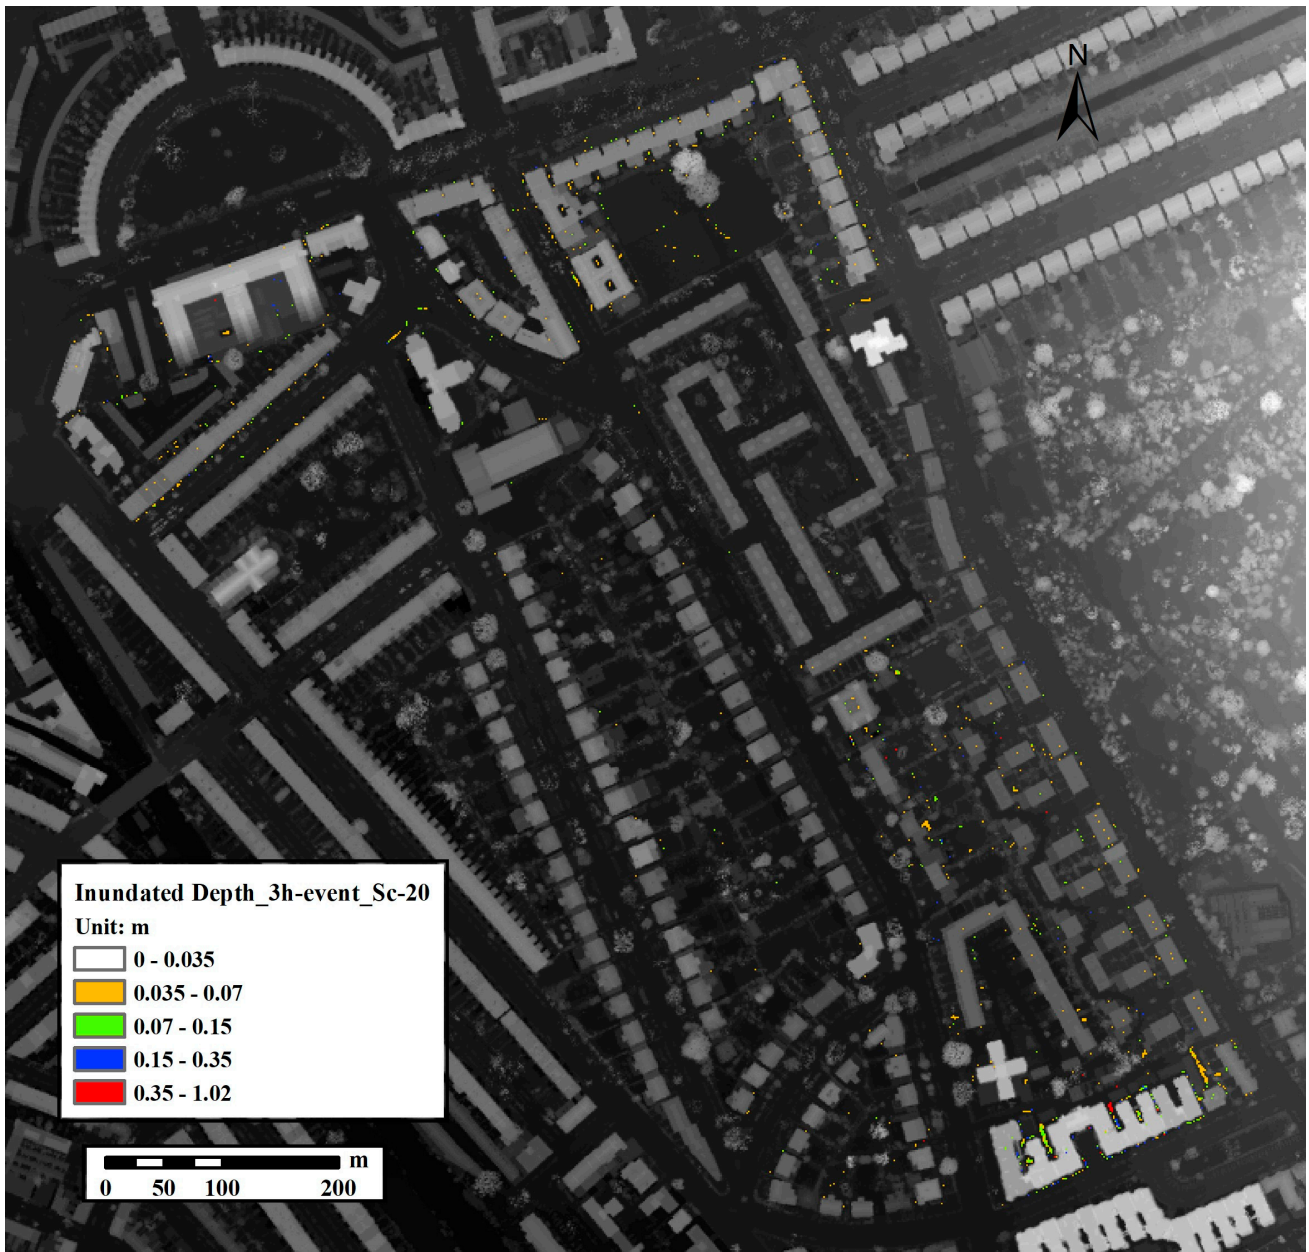

**Fig. S77.** Flood map of scenario 20 at the time of 4h (3-hour rainfall event)

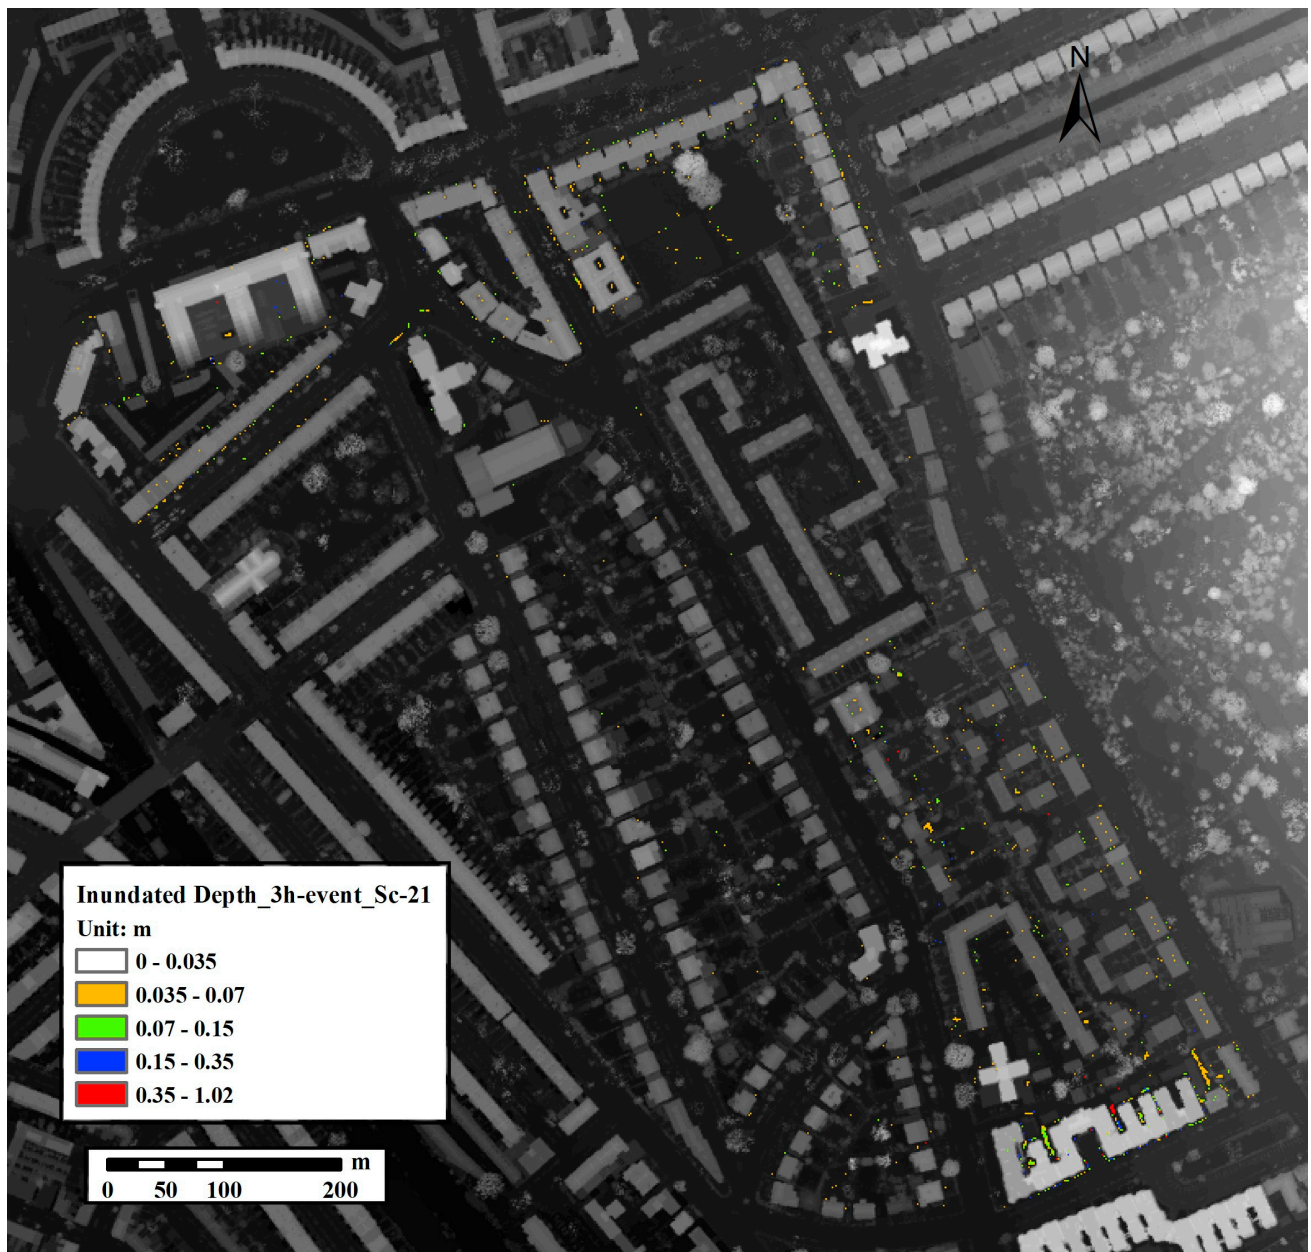

**Fig. S78.** Flood map of scenario 21 at the time of 4h (3-hour rainfall event)

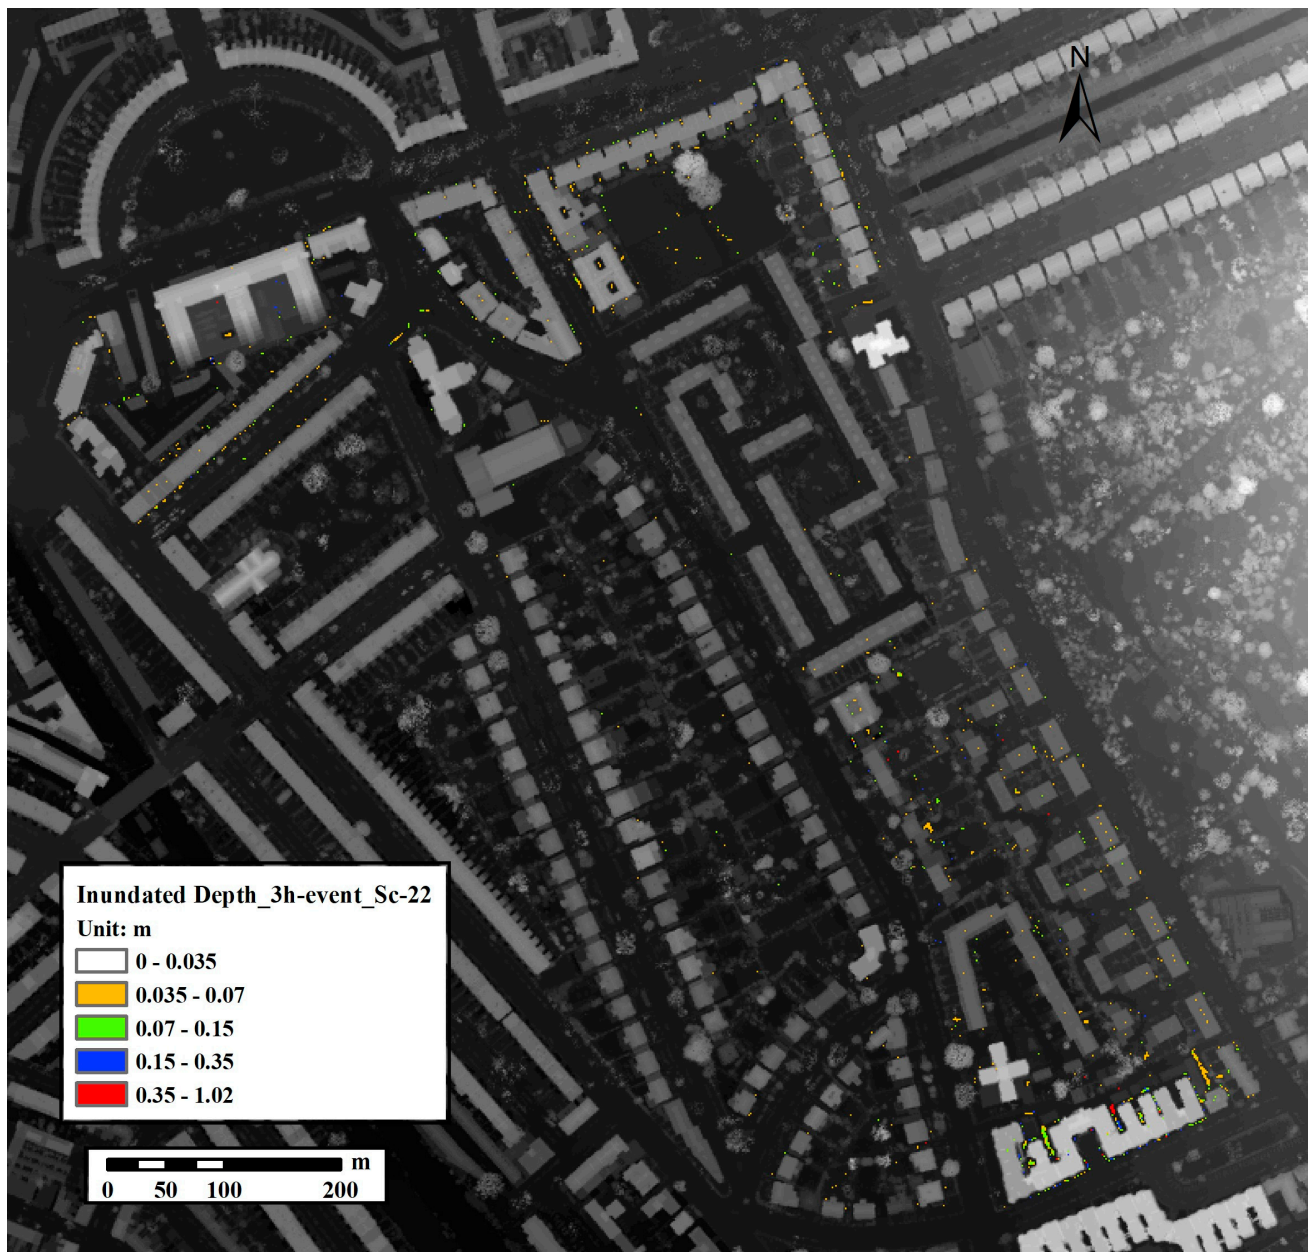

**Fig. S79.** Flood map of scenario 22 at the time of 4h (3-hour rainfall event)

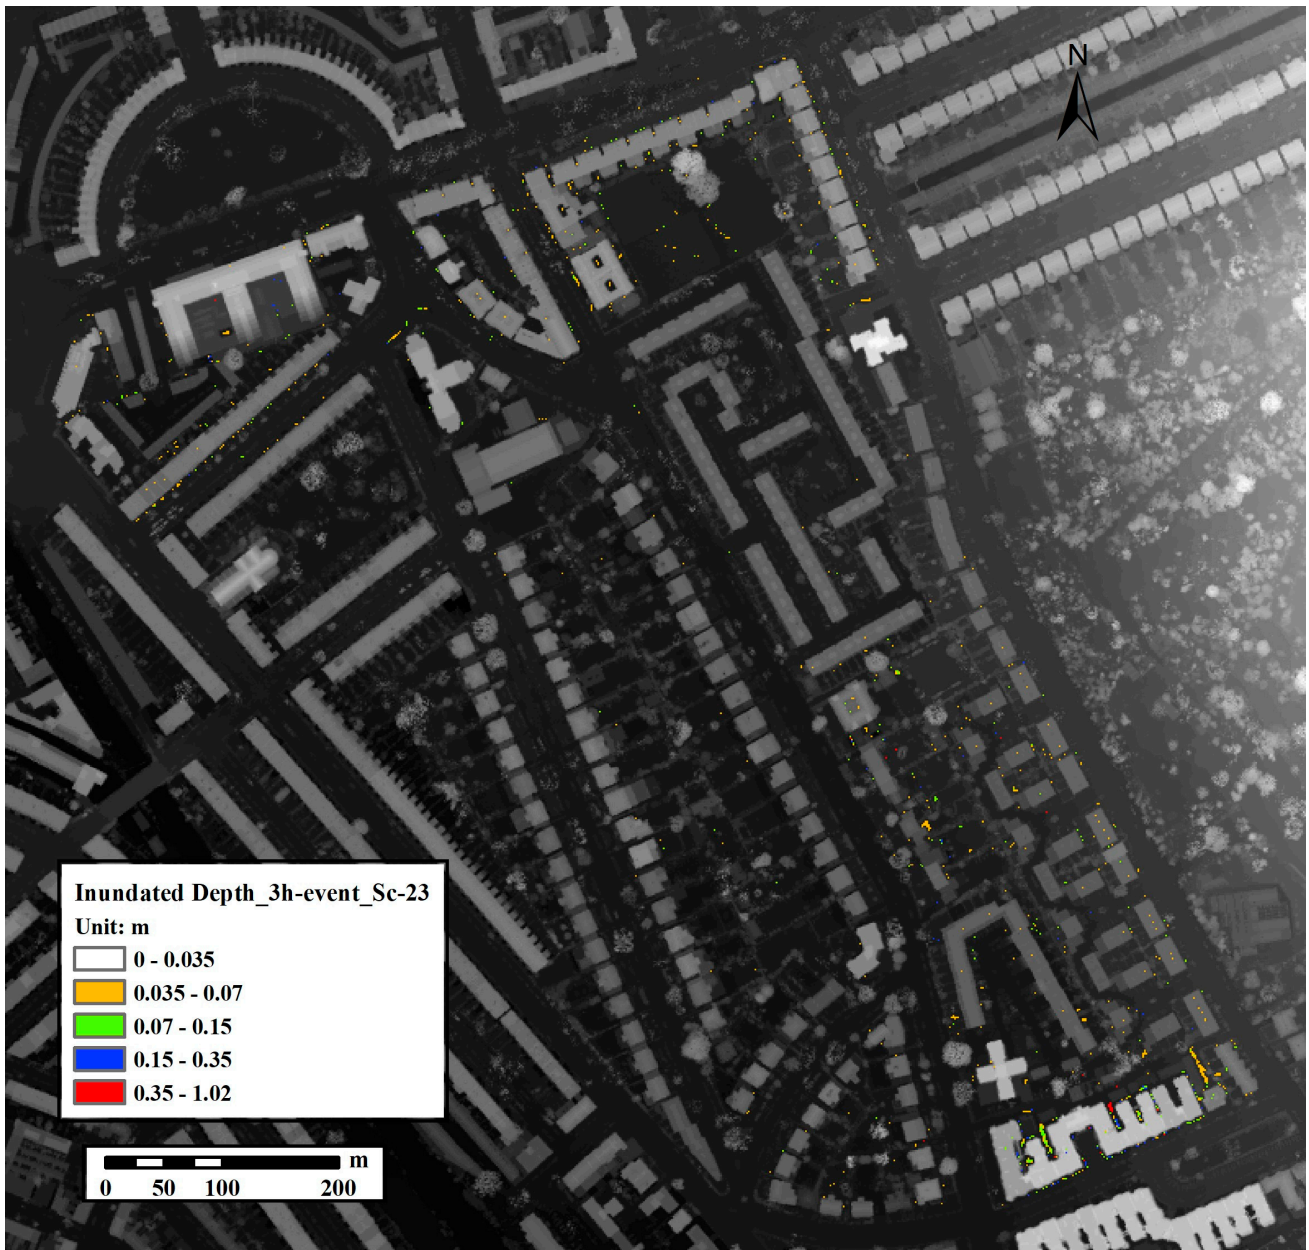

**Fig. S80.** Flood map of scenario 23 at the time of 4h (3-hour rainfall event)

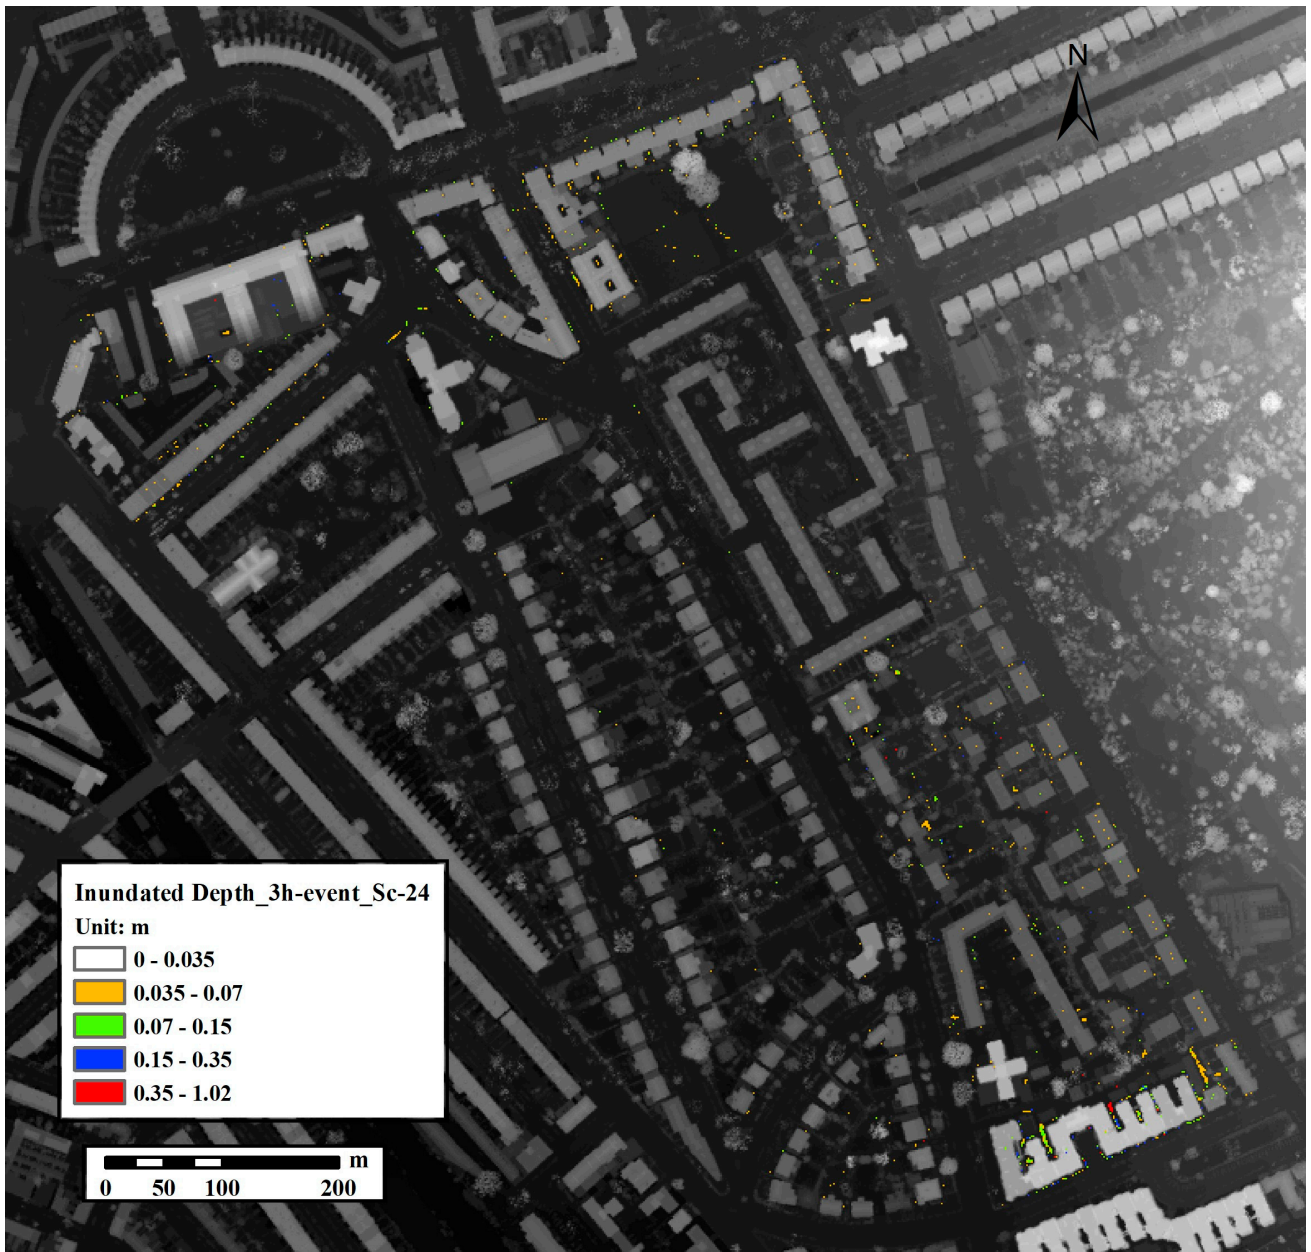

**Fig. S81.** Flood map of scenario 24 at the time of 4h (3-hour rainfall event)

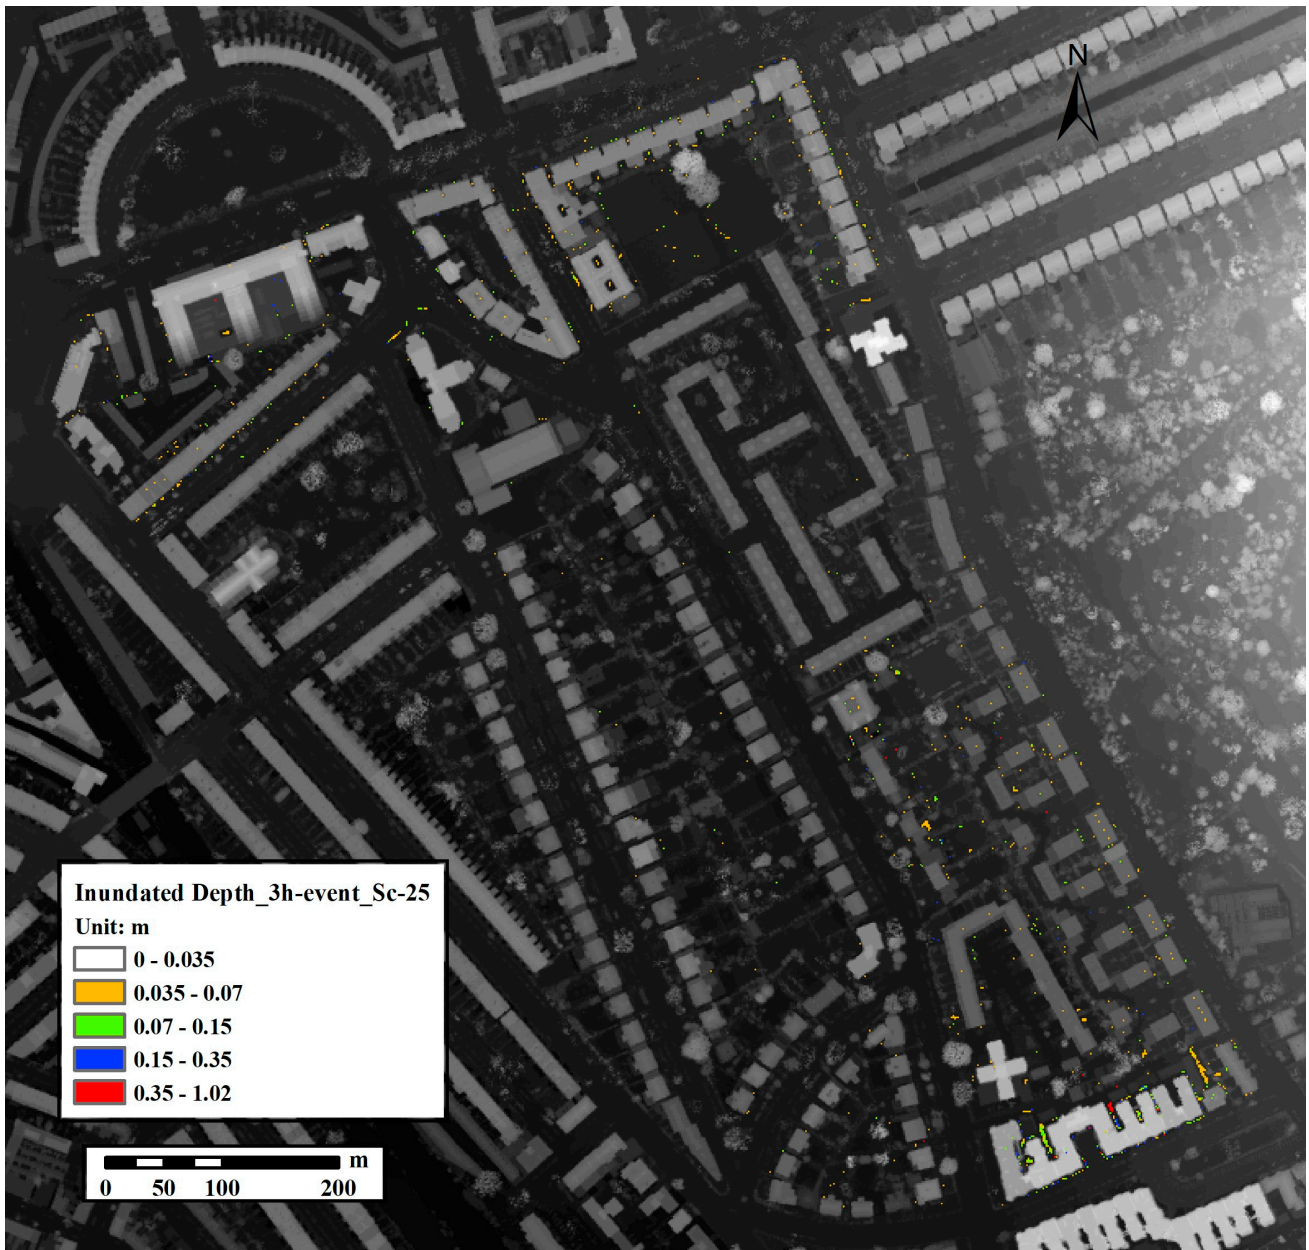

**Fig. S82.** Flood map of scenario 25 at the time of 4h (3-hour rainfall event)

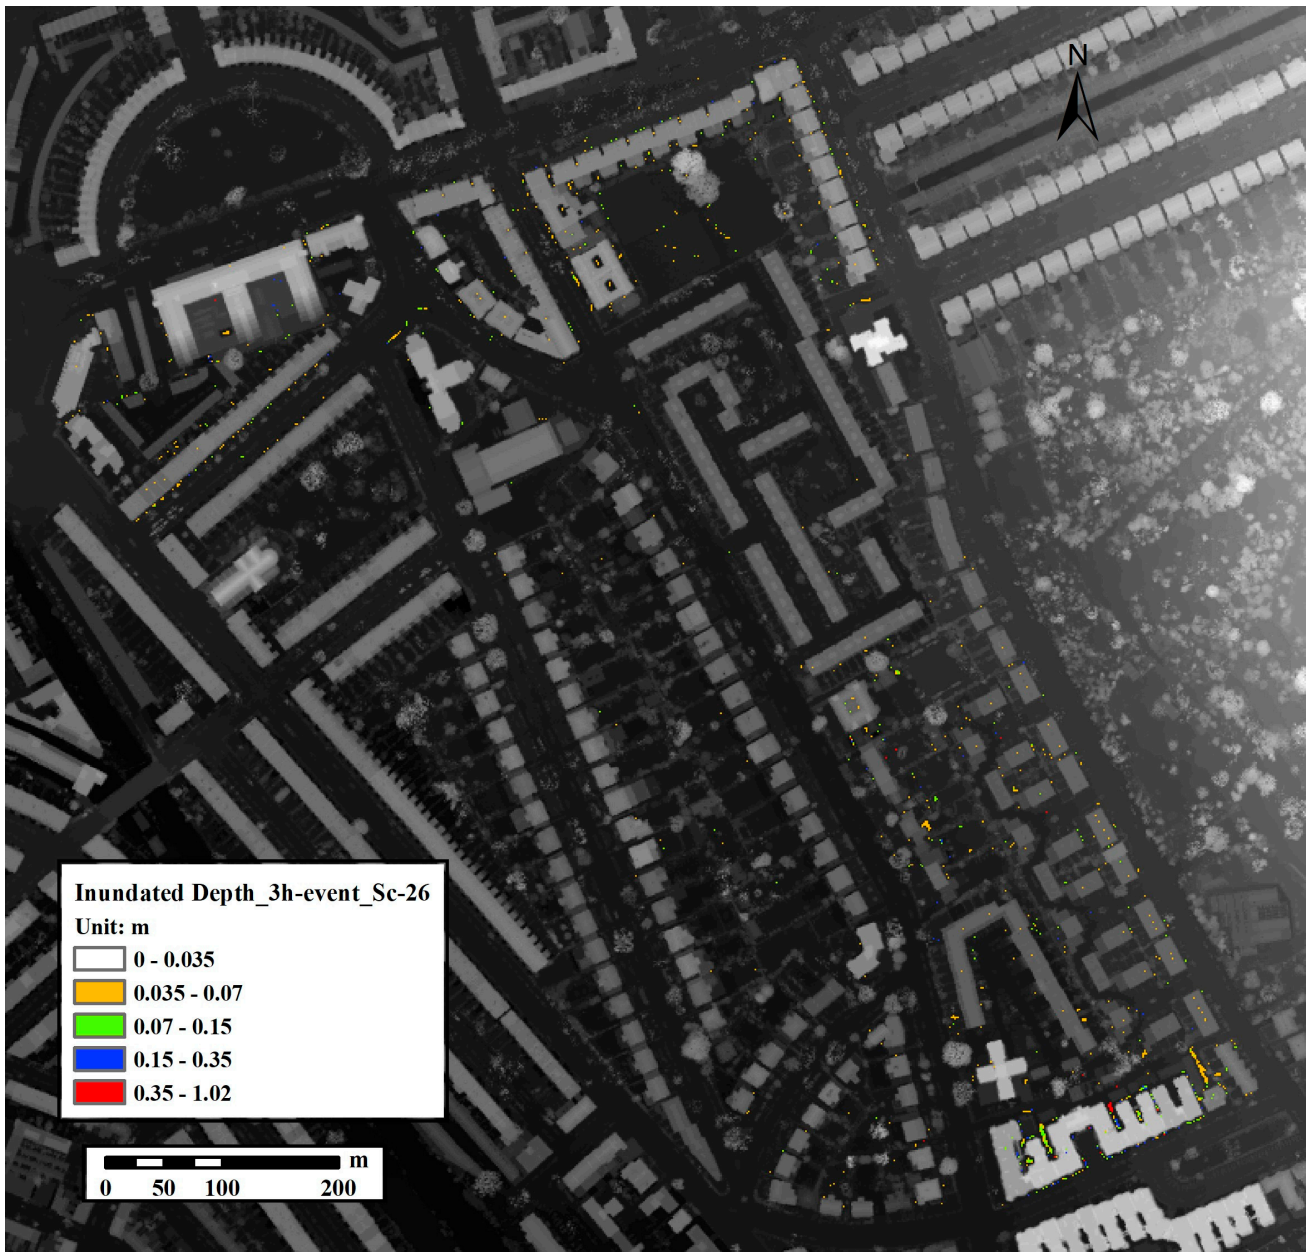

**Fig. S83.** Flood map of scenario 26 at the time of 4h (3-hour rainfall event)

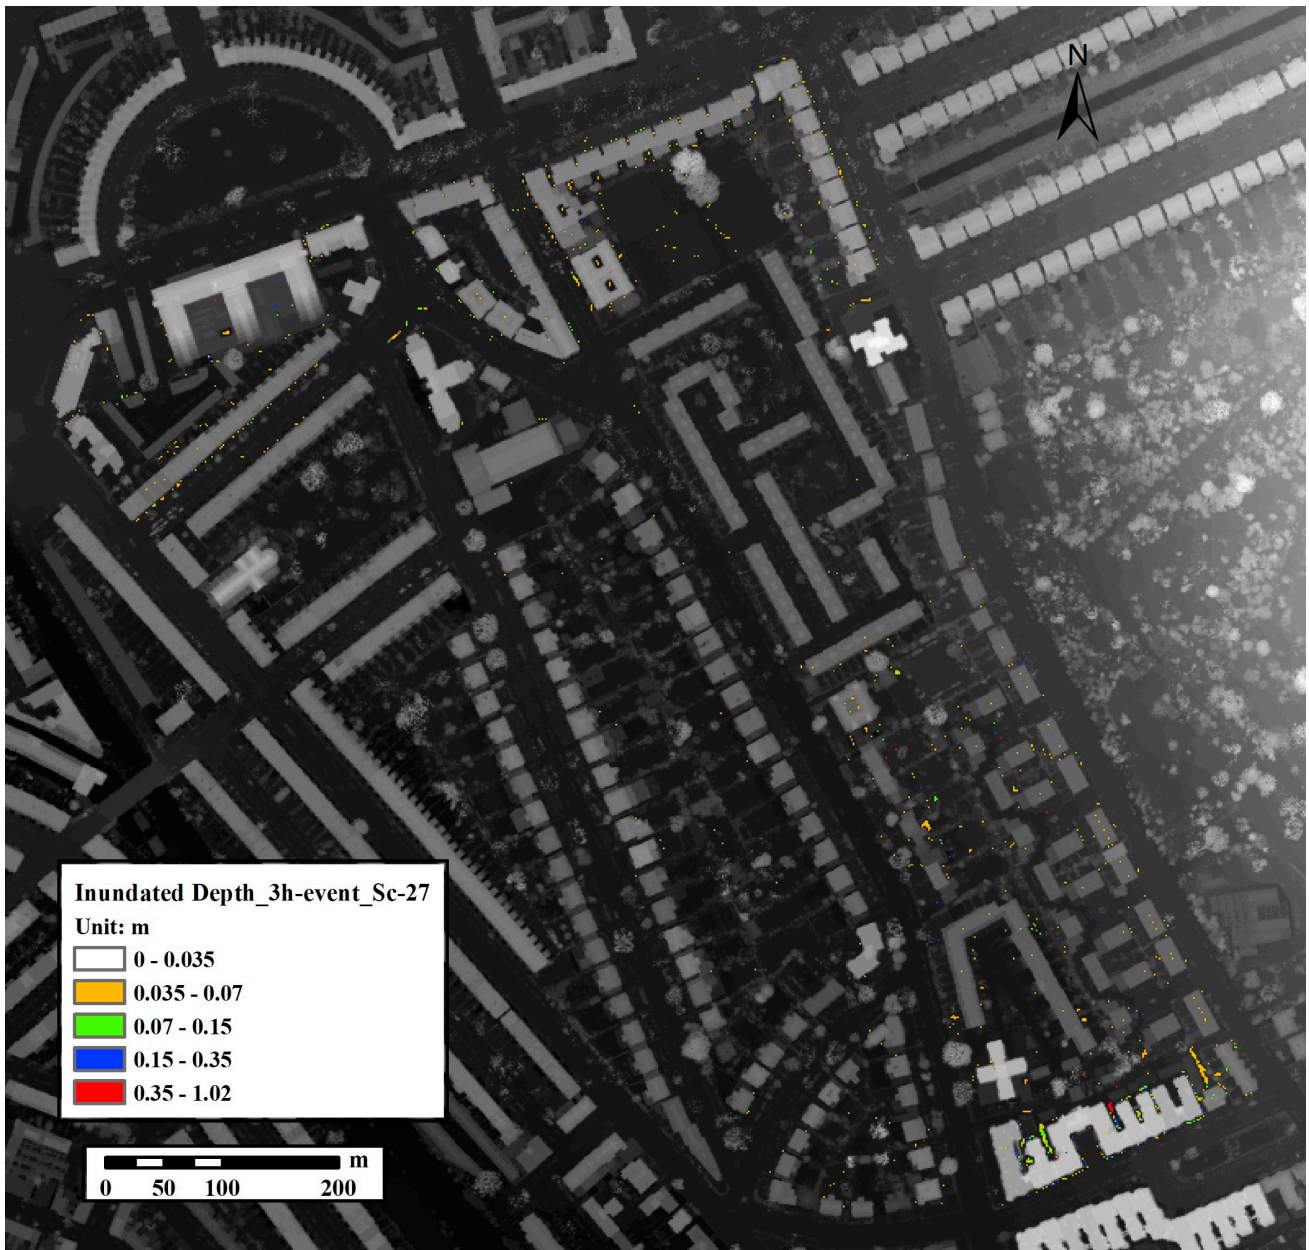

**Fig. S84.** Flood map of scenario 27 at the time of 4h (3-hour rainfall event)
