# Supplementary material for: Investigating the Impact of Spatial Distribution of Sustainable Drainage System (SuDS) Components on Their Flood Mitigation Performance in Communities with High Groundwater Levels
Source: MDPI journal article supplement (doi:10.3390/w14091367), 2022-04-22
Supplement: s1 [file s1]

Archive with 1 entries (1 files):
- water-1652301-supplementary.pdf
